# Supplementary material for: Groebke multicomponent reaction and subsequent nucleophilic aromatic substitution for a convenient synthesis of 3,8-diaminoimidazo[1,2-a]pyrazines as potential kinase inhibitors
Source: Royal Society of Chemistry journal article supplement (doi:10.1039/c1ob05336a), 2011-01-01

# Groebke-Blackburn-Bienaymé multicomponent reaction and subsequent nucleophilic aromatic substitution for a convenient synthesis of 3,8-diaminoimidazo[1,2-a]pyrazines as potential kinase inhibitors

Margherita Guasconi,<sup>#a</sup> Xiaoyun Lu,<sup>#b,c</sup> Alberto Massarotti,<sup>a</sup> Antonio Caldarelli,<sup>a</sup> Elisa Ciraolo,<sup>b</sup> Gian  
5 Cesare Tron,<sup>a</sup> Emilio Hirsch,<sup>b</sup> Giovanni Sorba<sup>a</sup> and Tracey Pirali<sup>\*a</sup>

<sup>a</sup> DiSCAFF, Università degli Studi del Piemonte Orientale, via Bovio 6, 28100 Novara, Italy. Fax: (+39)0321375821; Tel: (+39)0321375853; E-mail: tracey.pirali@pharm.unipmn.it

<sup>b</sup> Molecular Biotechnology Center, Università degli Studi di Torino, 10126 Torino, Italy

<sup>c</sup> Department of Biological Science and Bioengineering, Key Laboratory of Biomedical Information Engineering of  
10 Ministry of Education, School of Life Science and Technology, Xi'an Jiaotong University, Xi'an 710049, Shaanxi, P. R. China

15

## Supporting Information

- proton and carbon NMR spectra

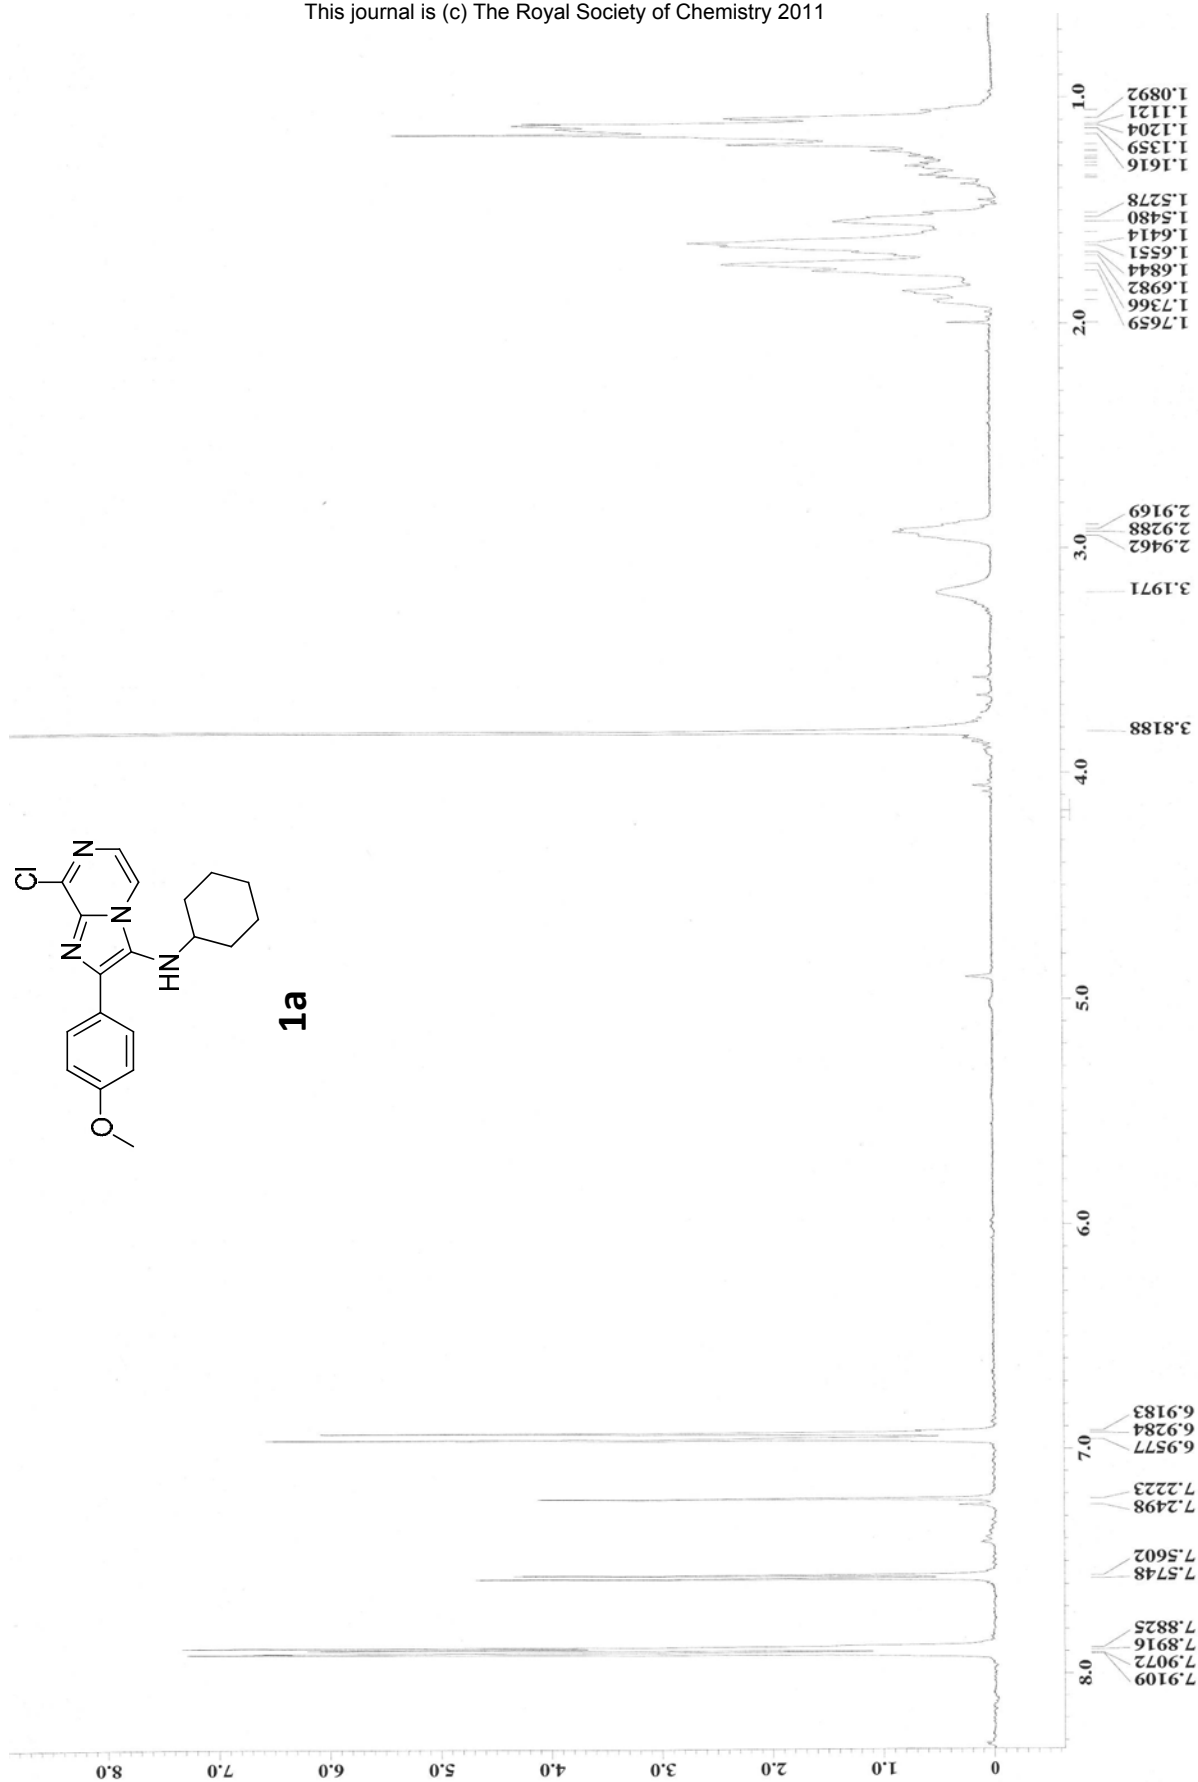

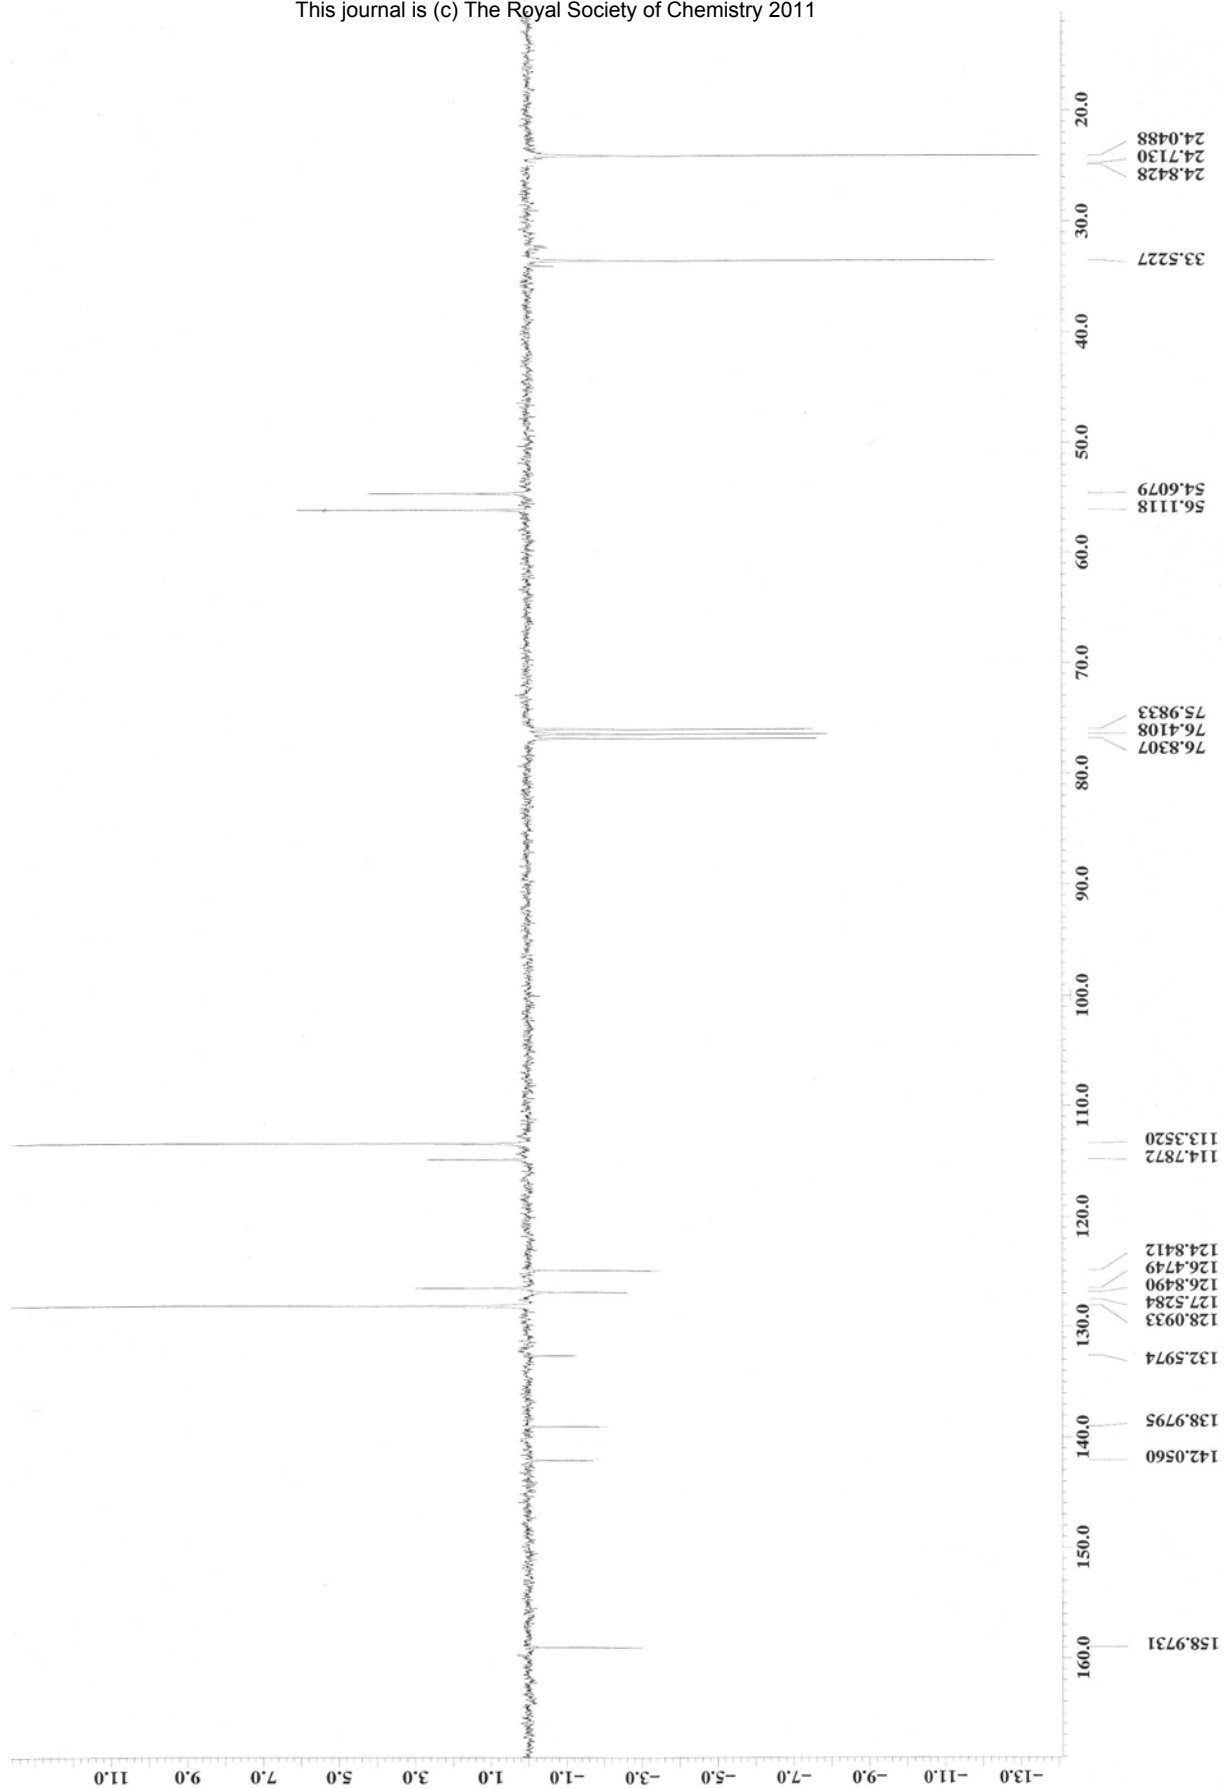

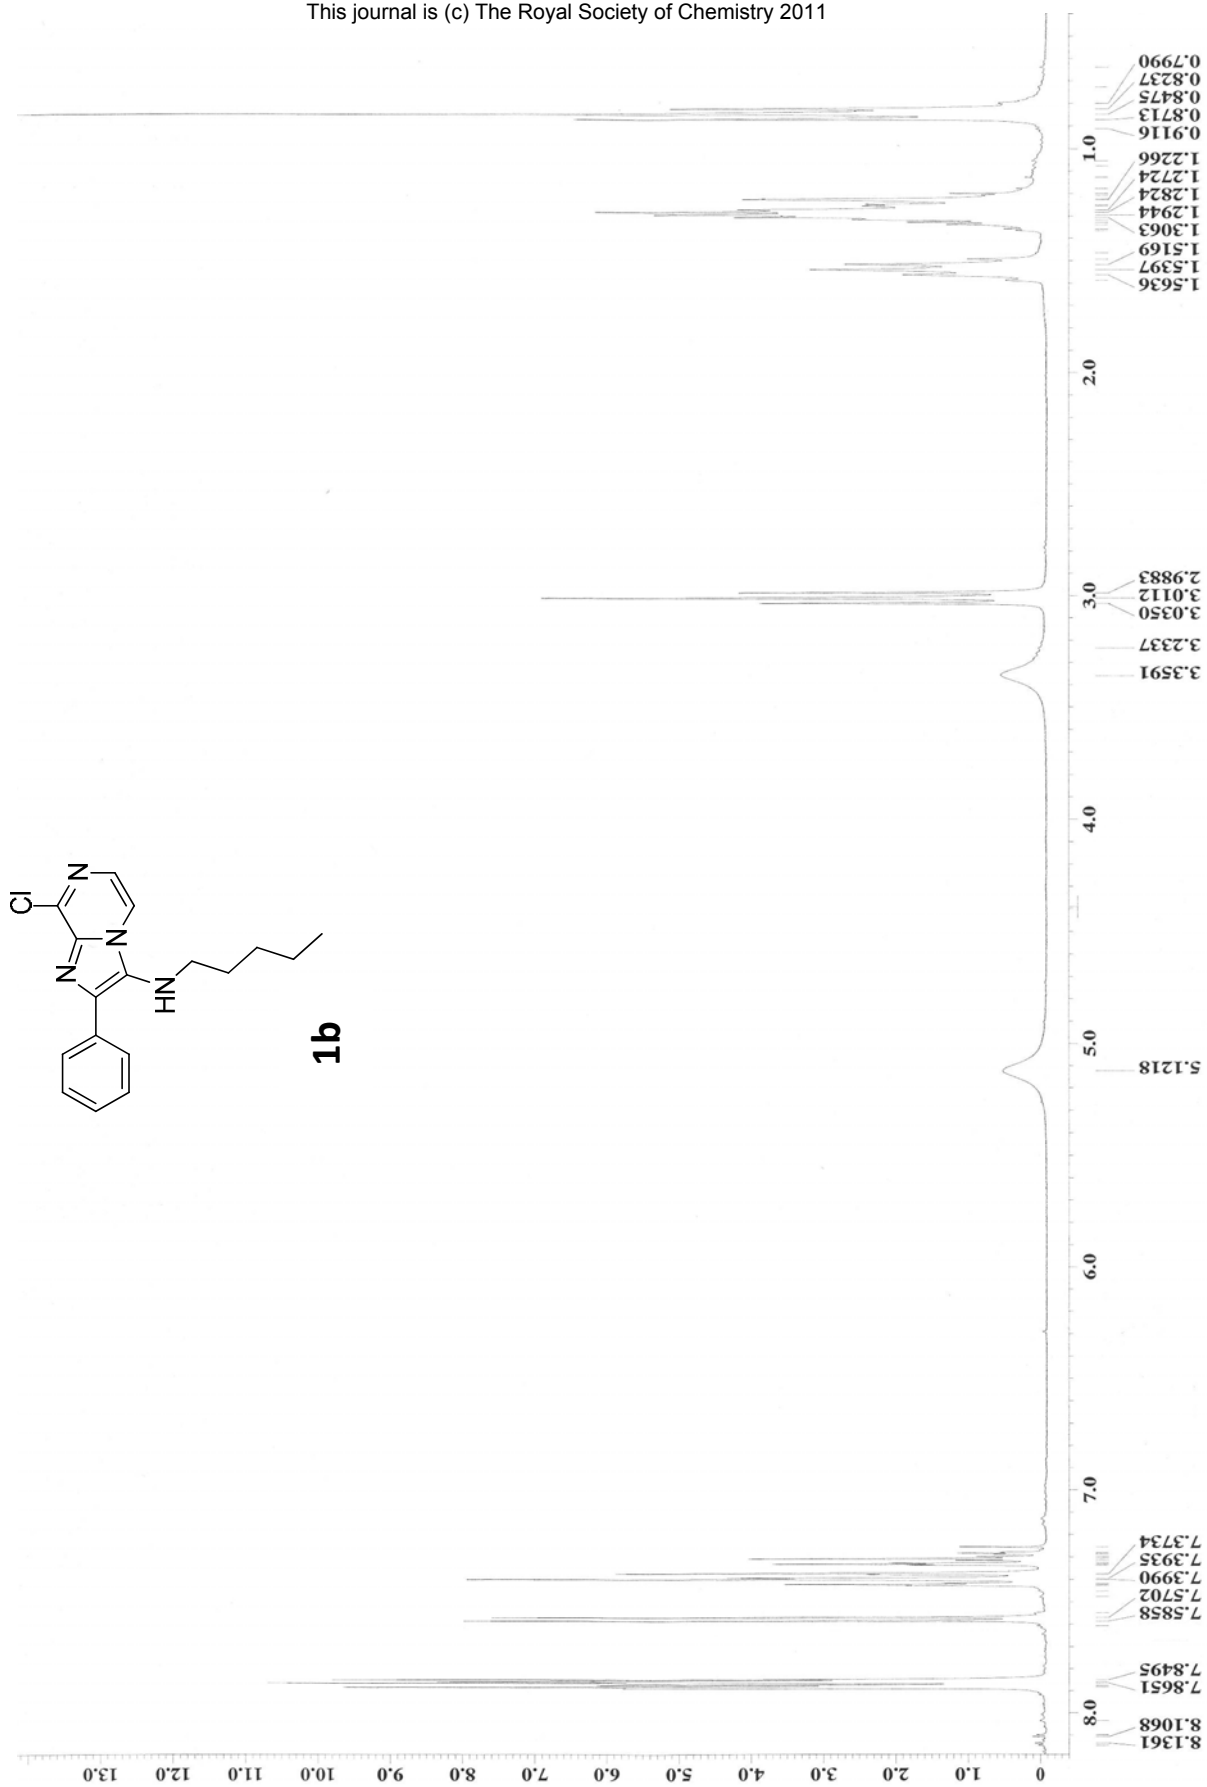

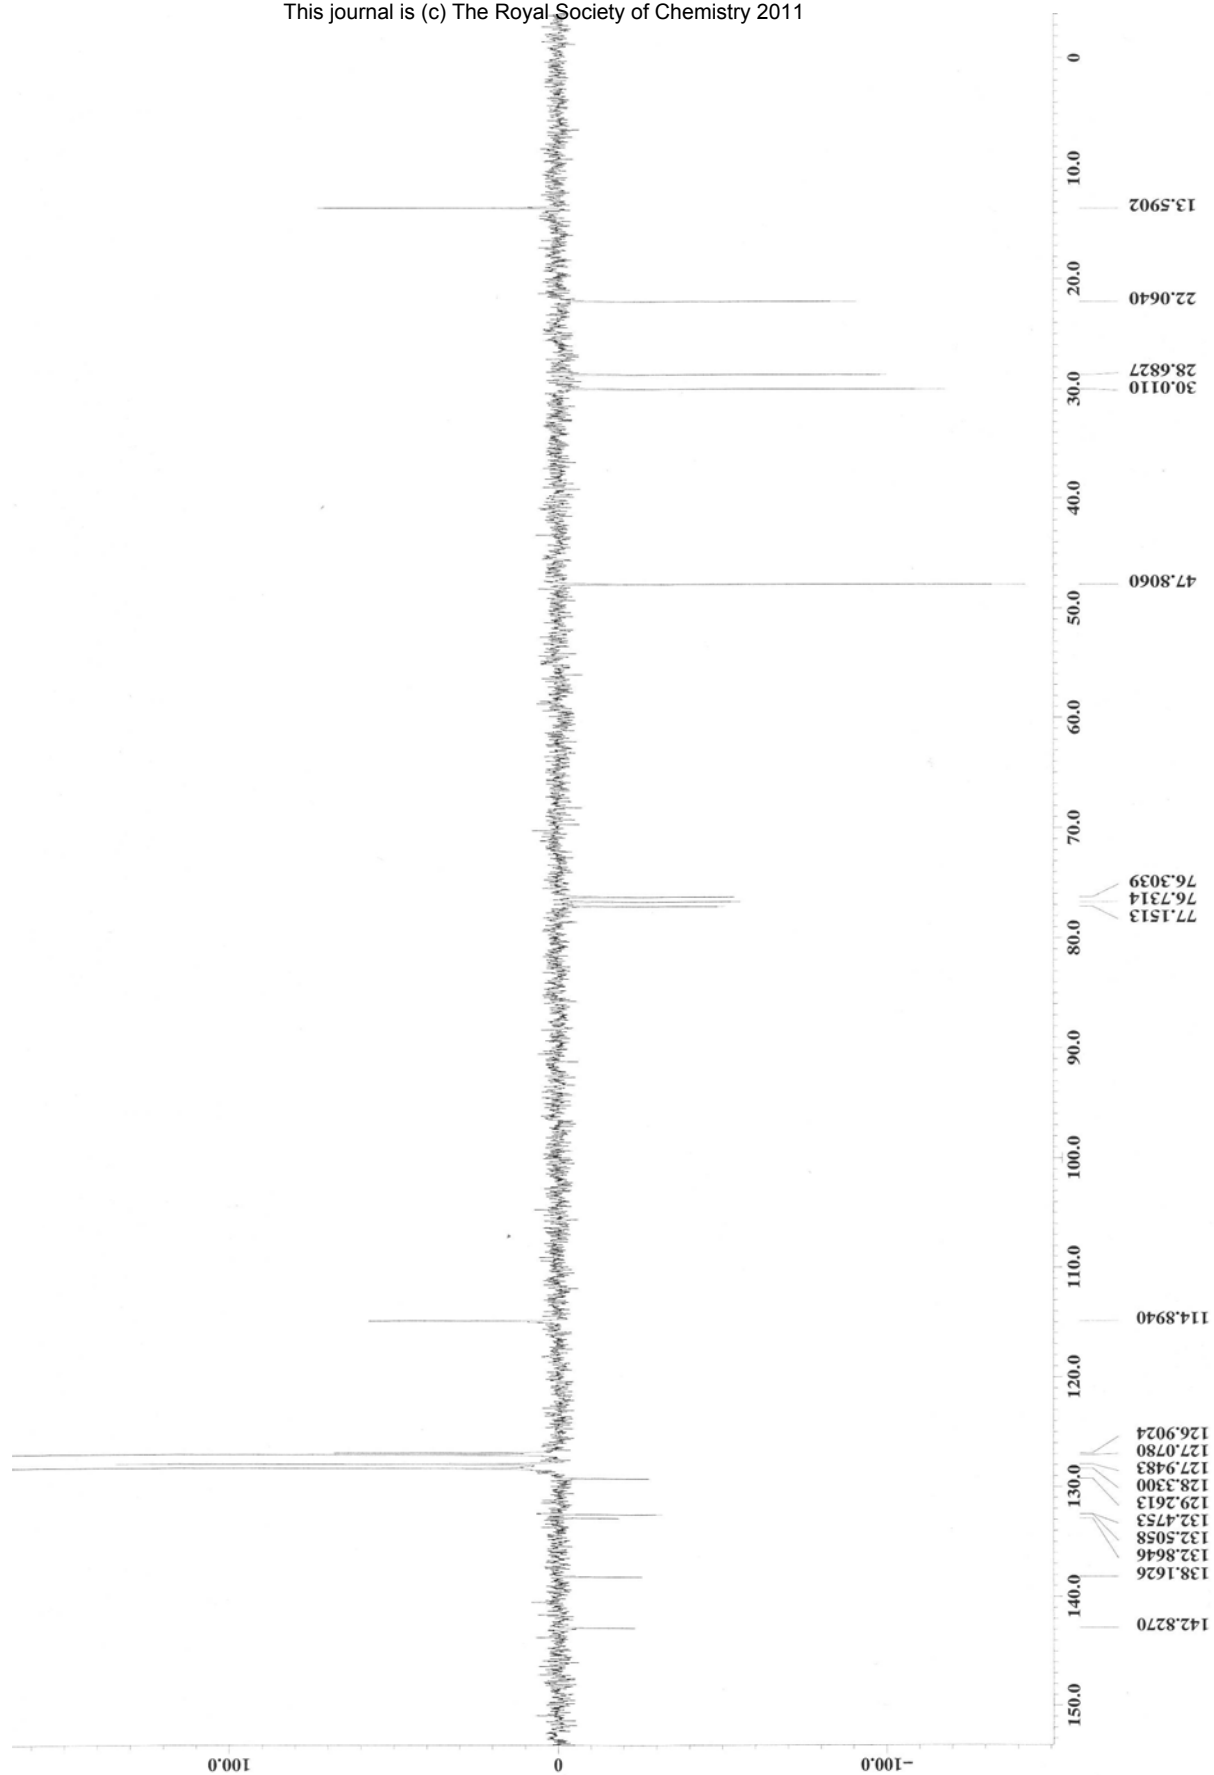

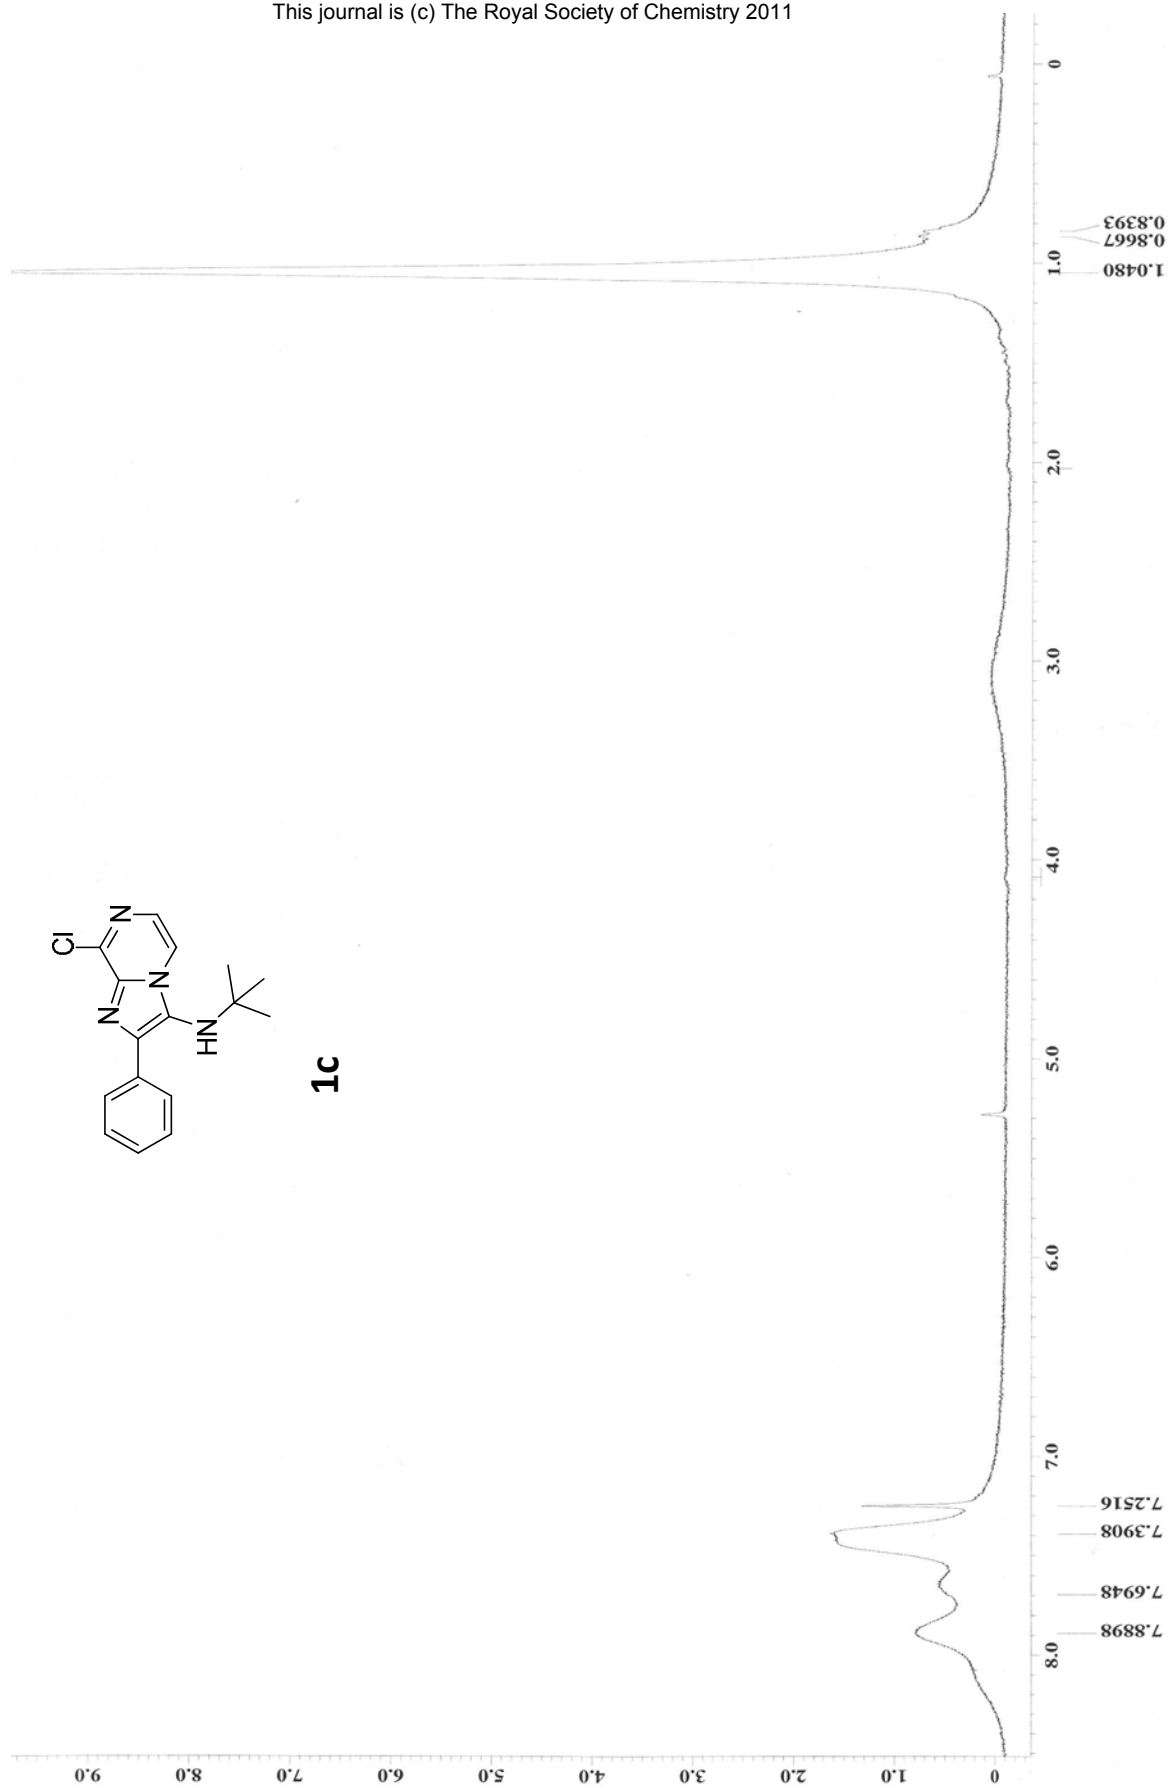

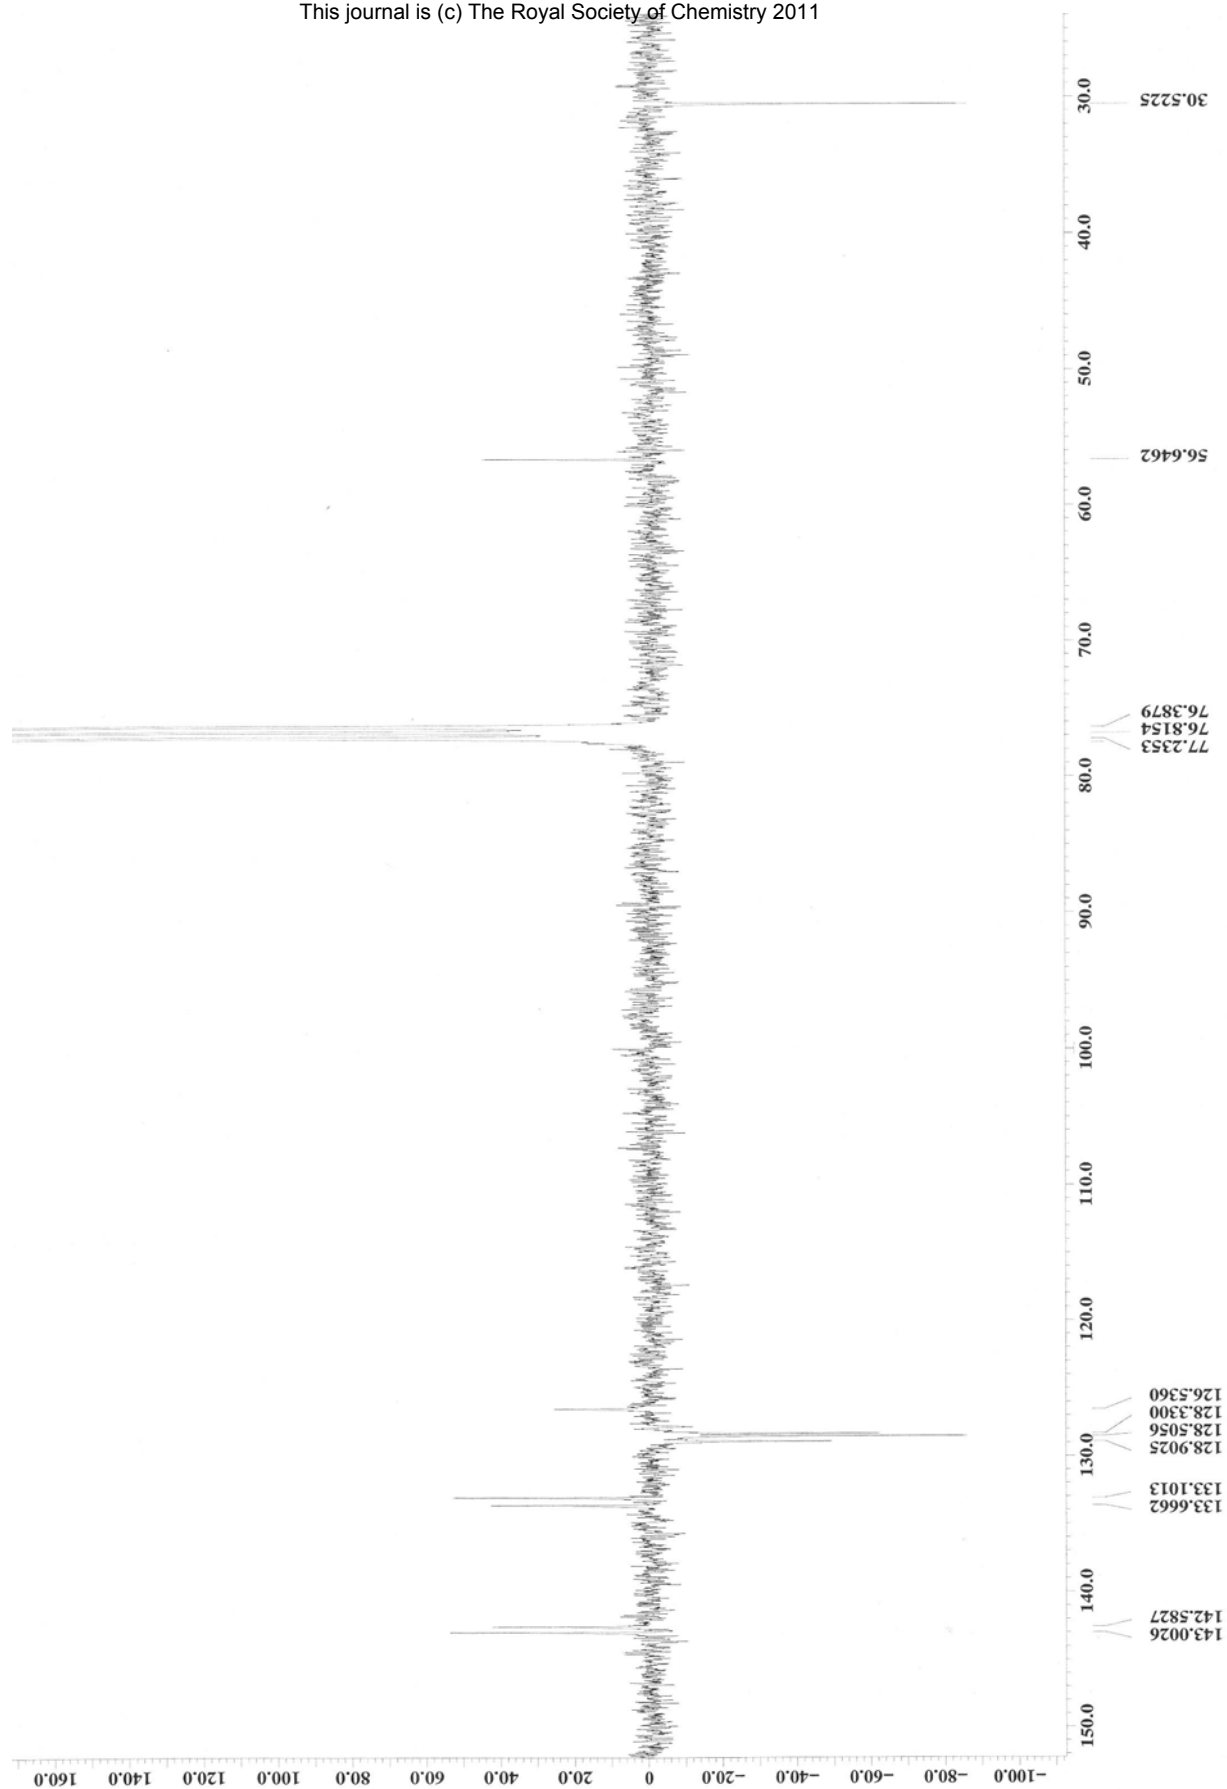

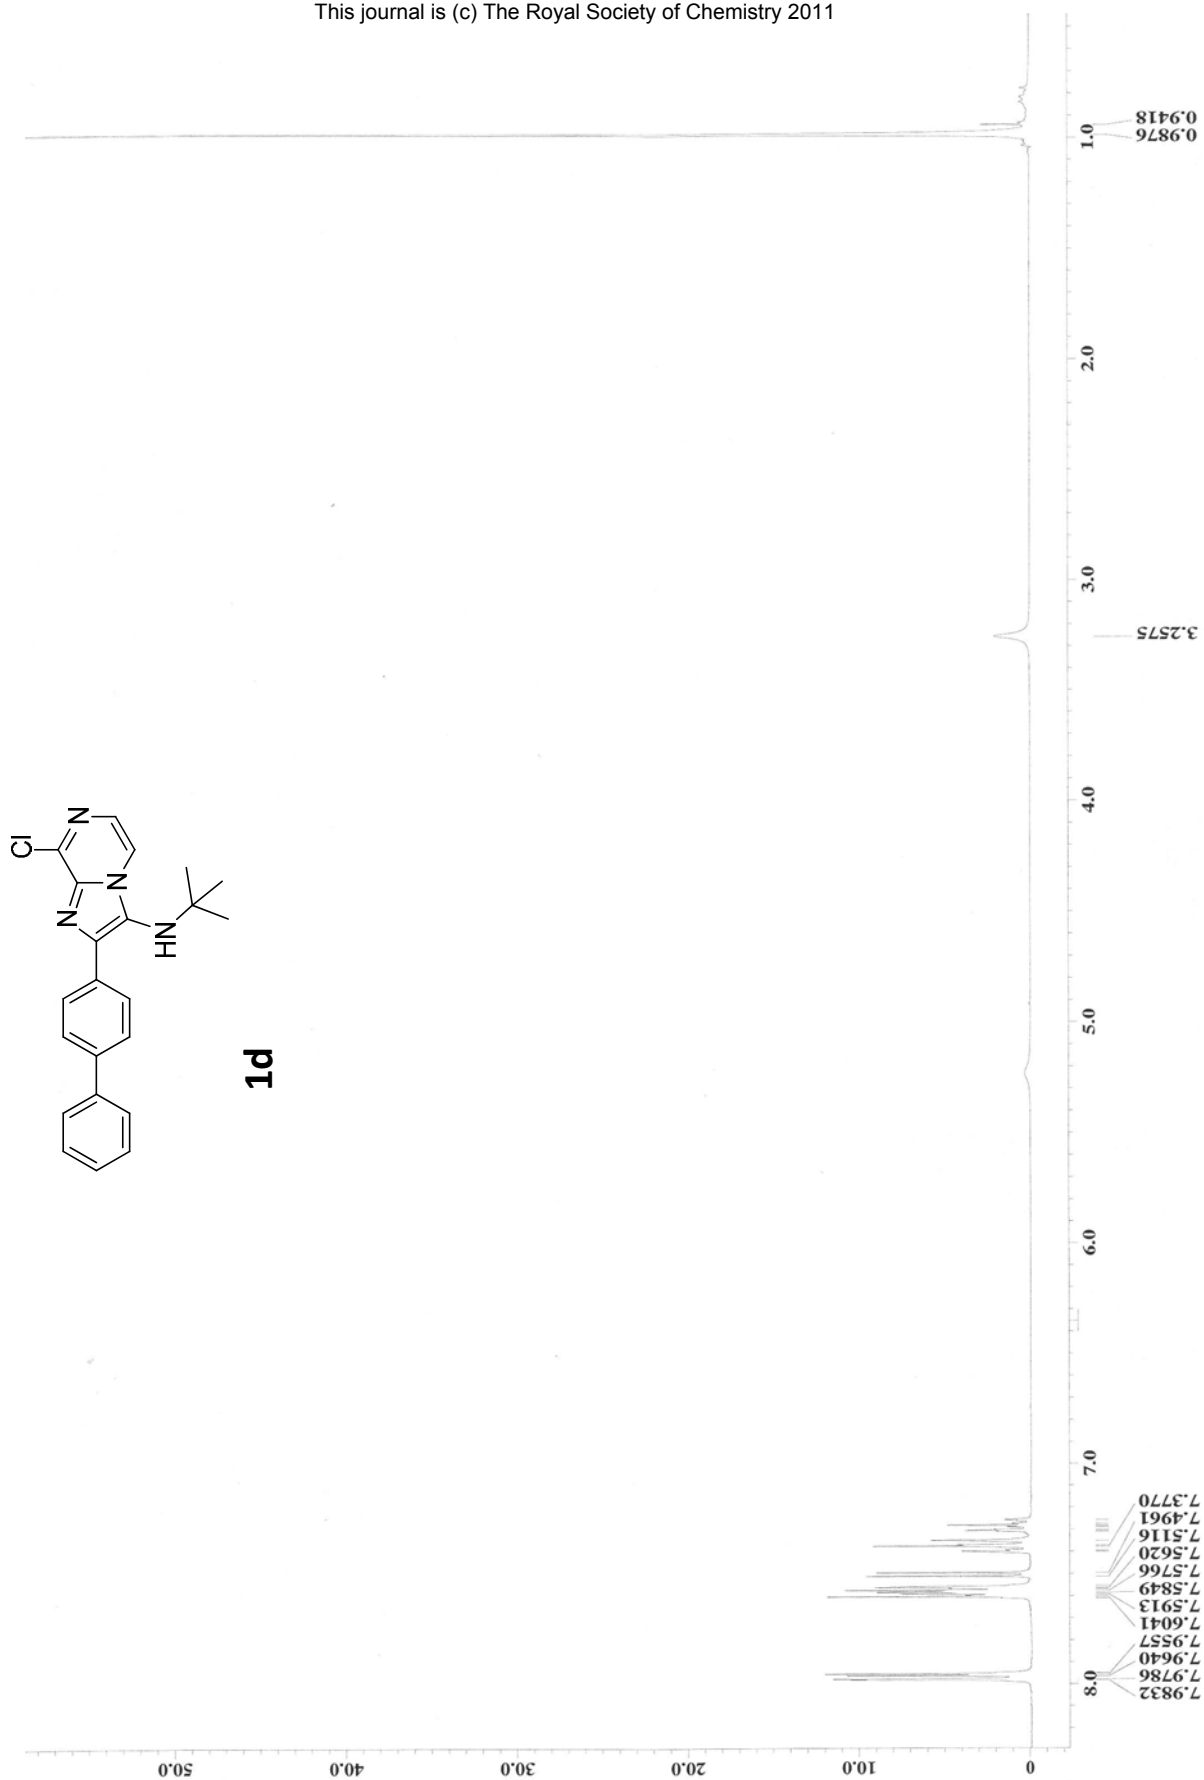



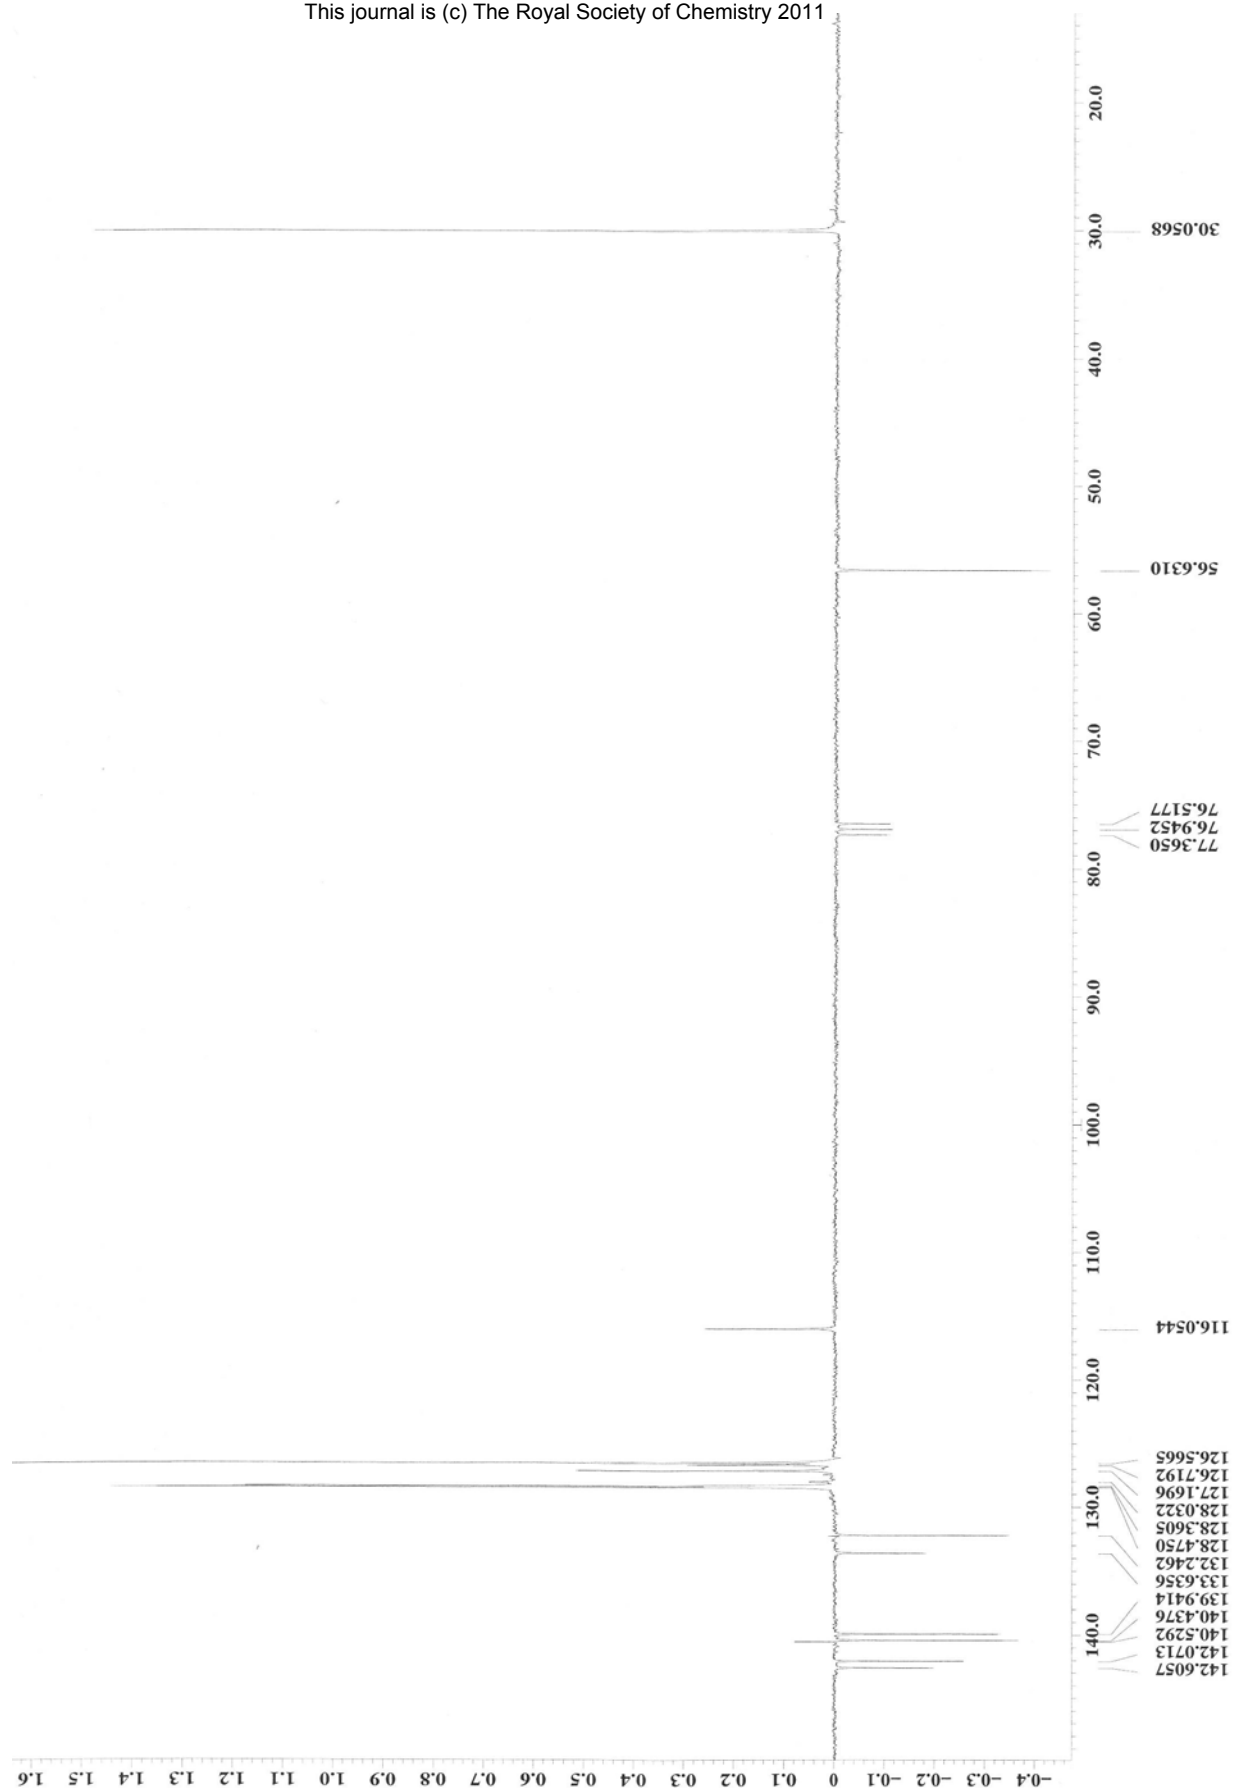

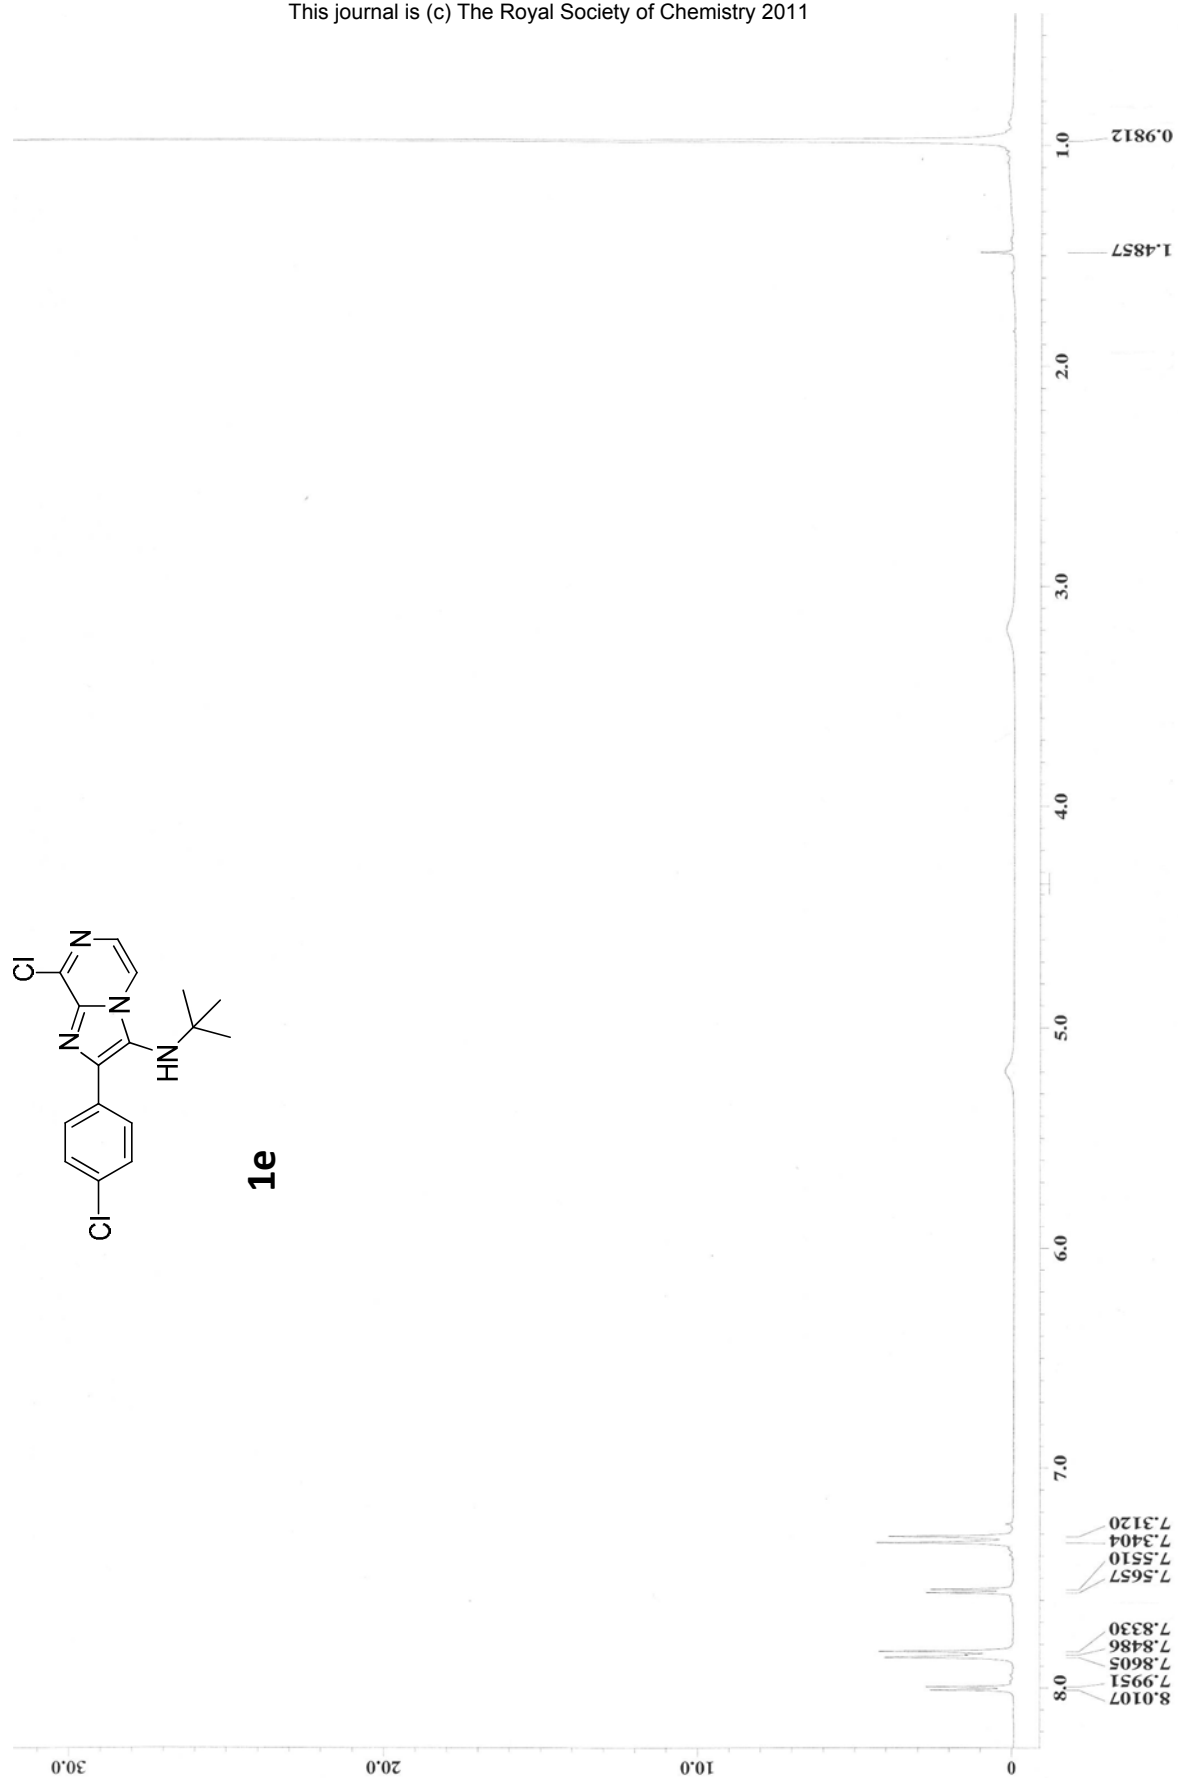

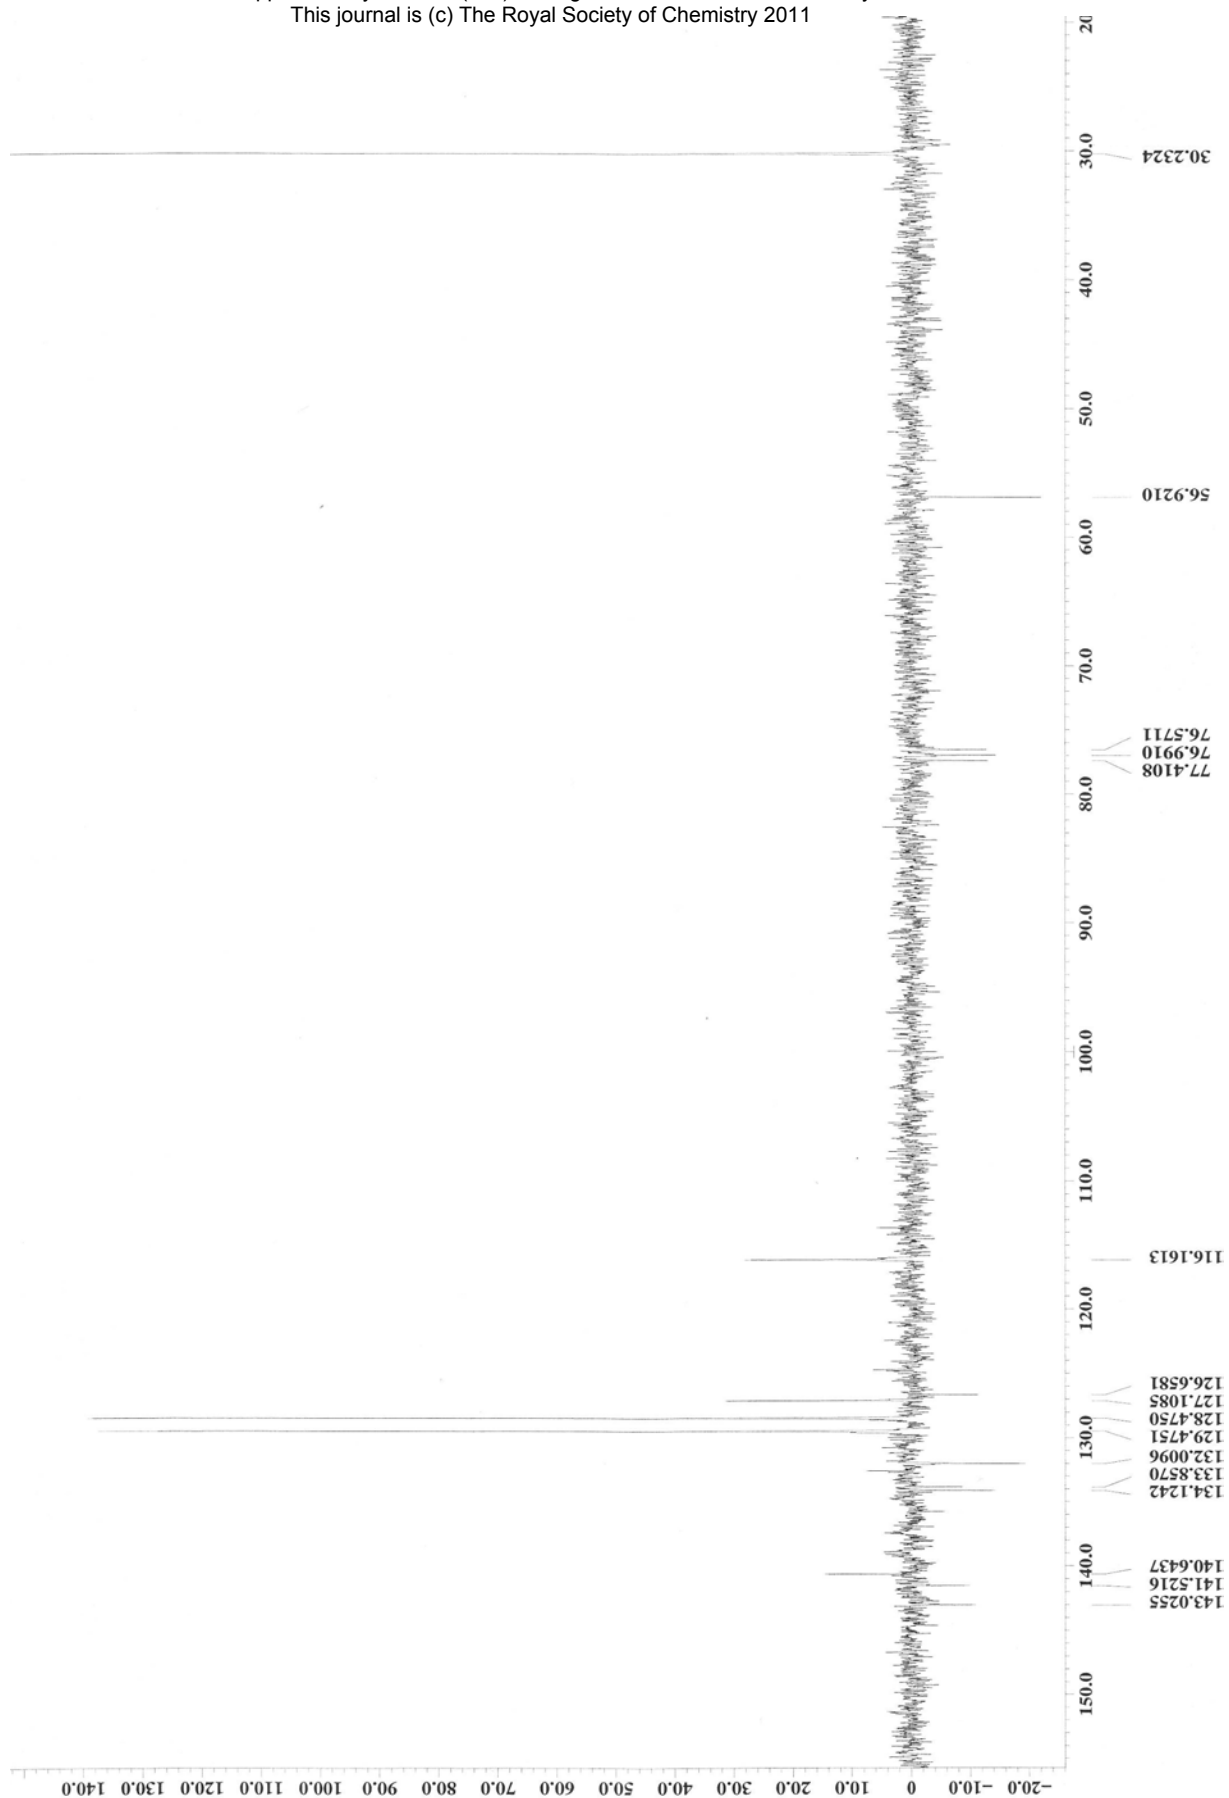

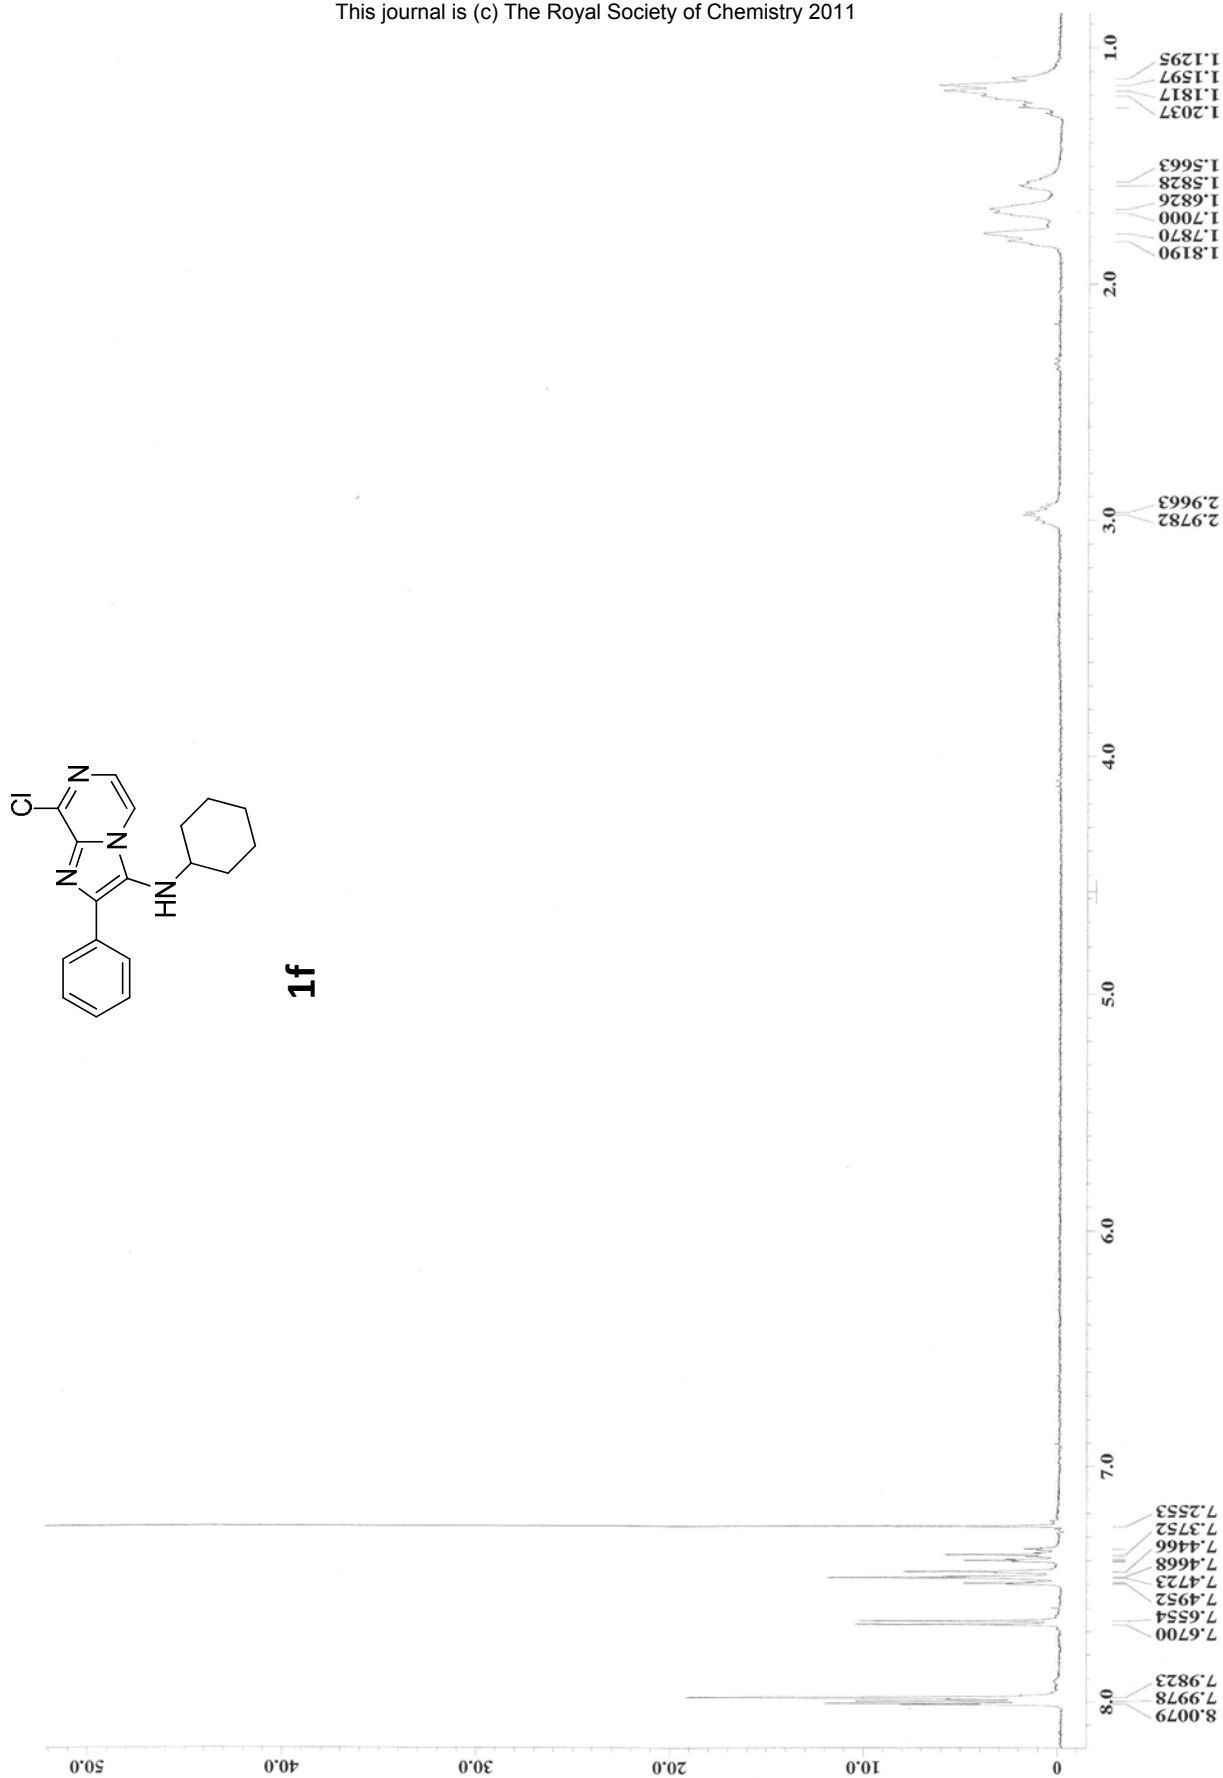

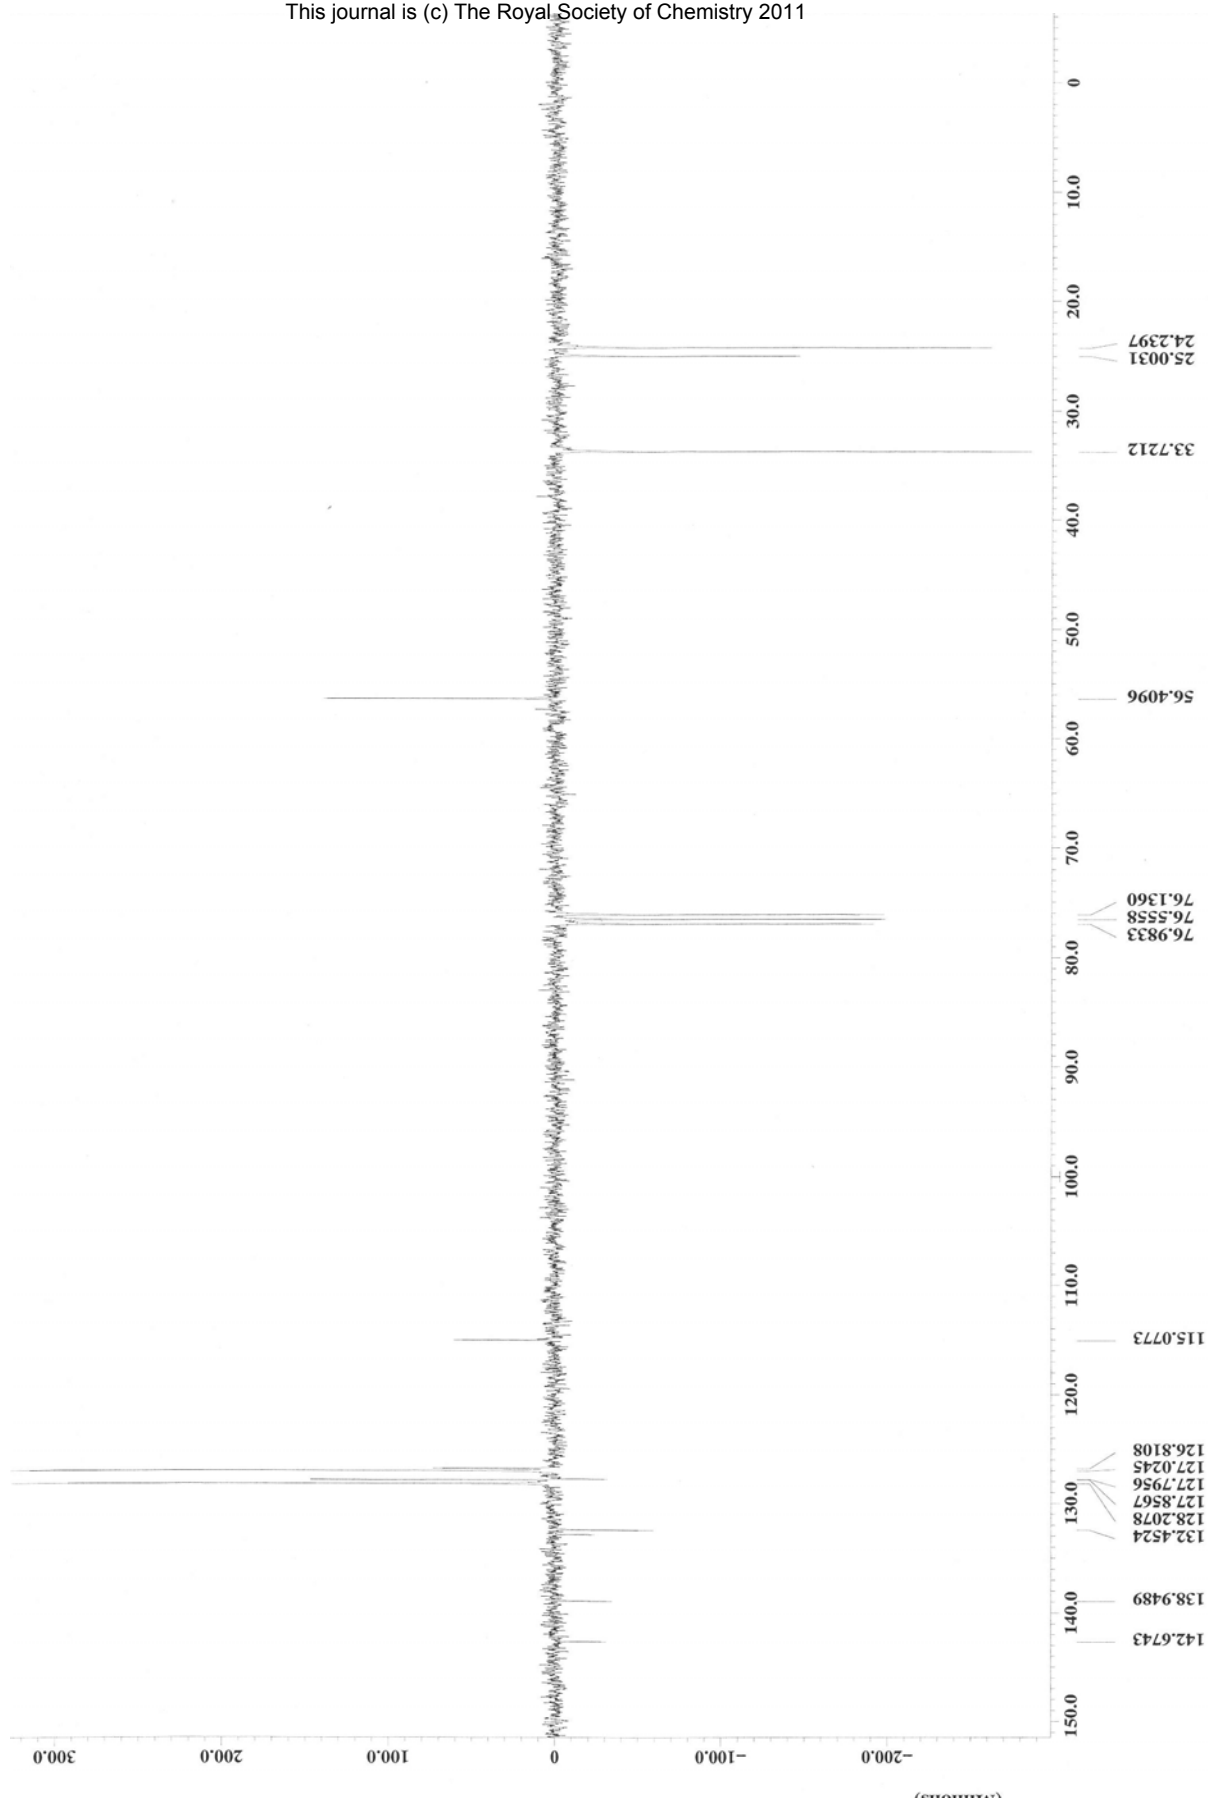

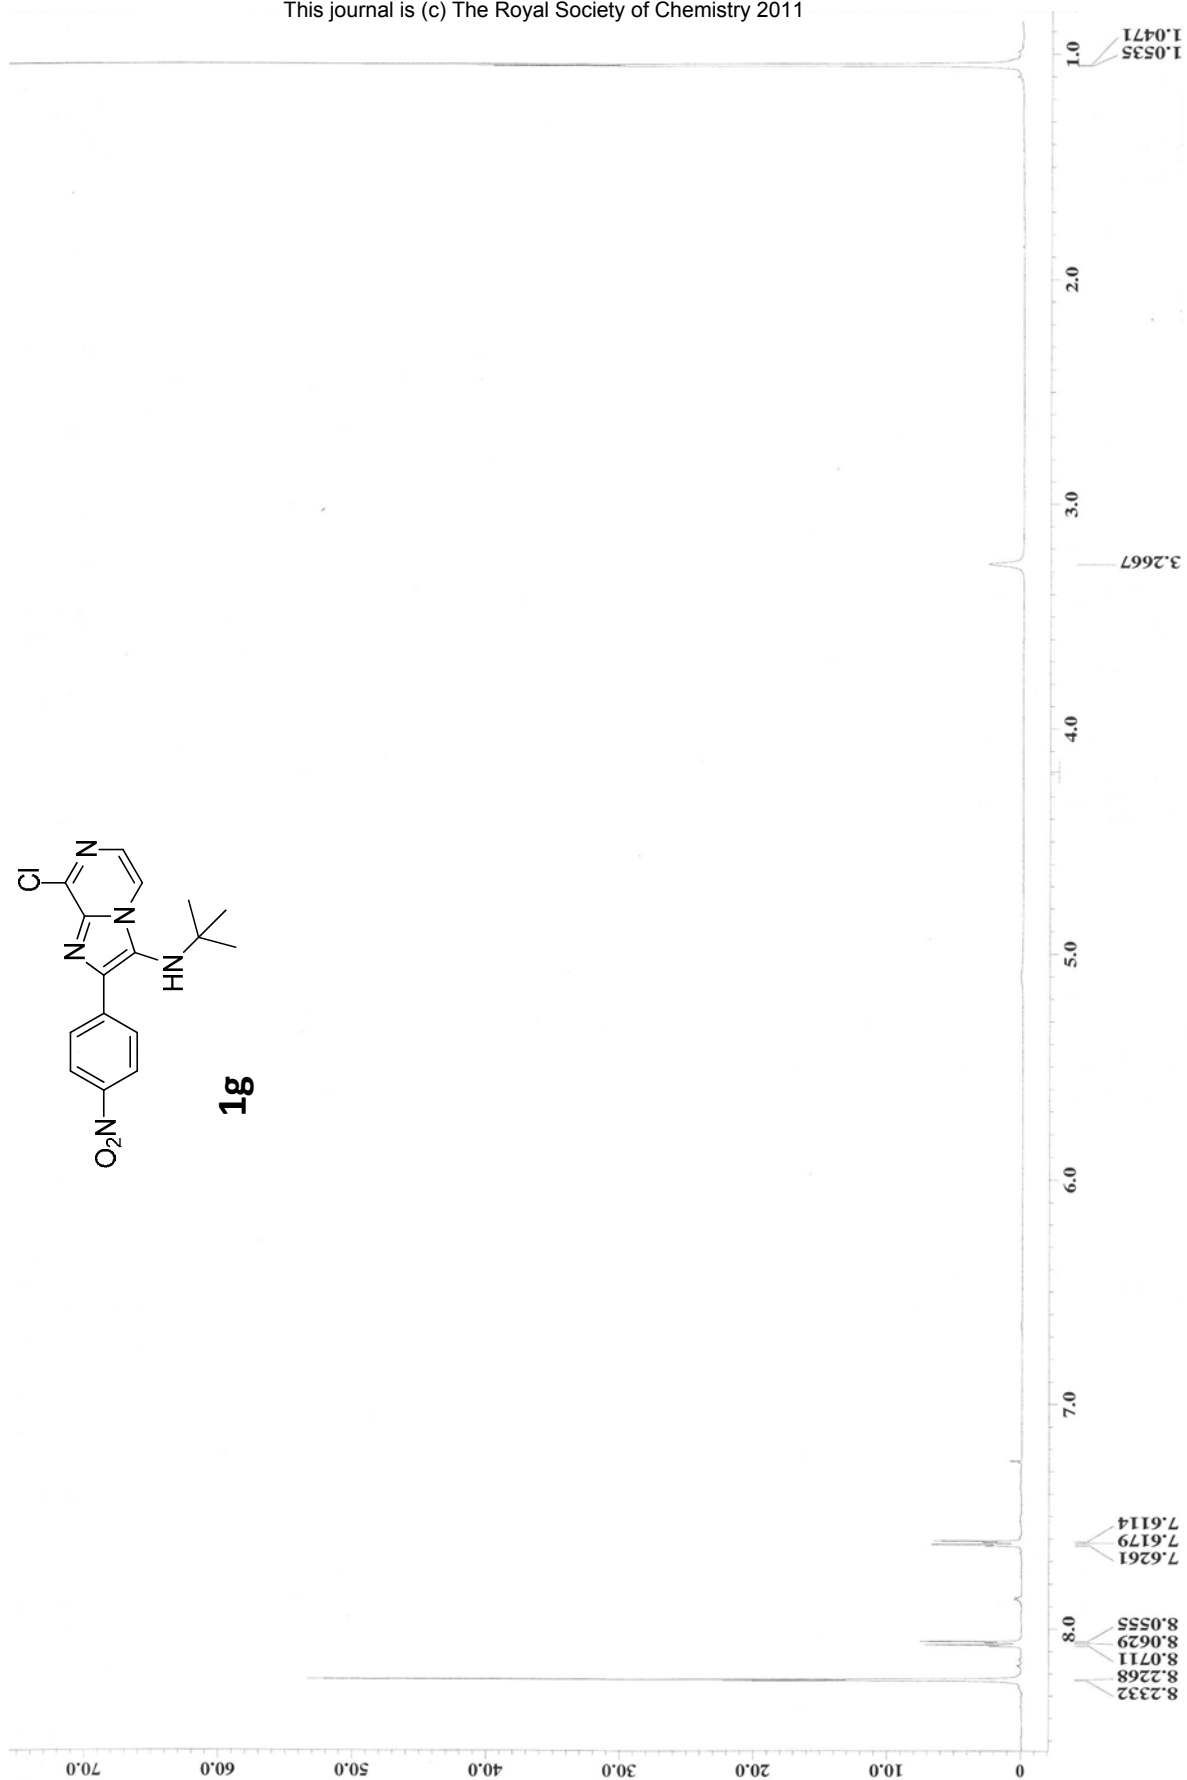

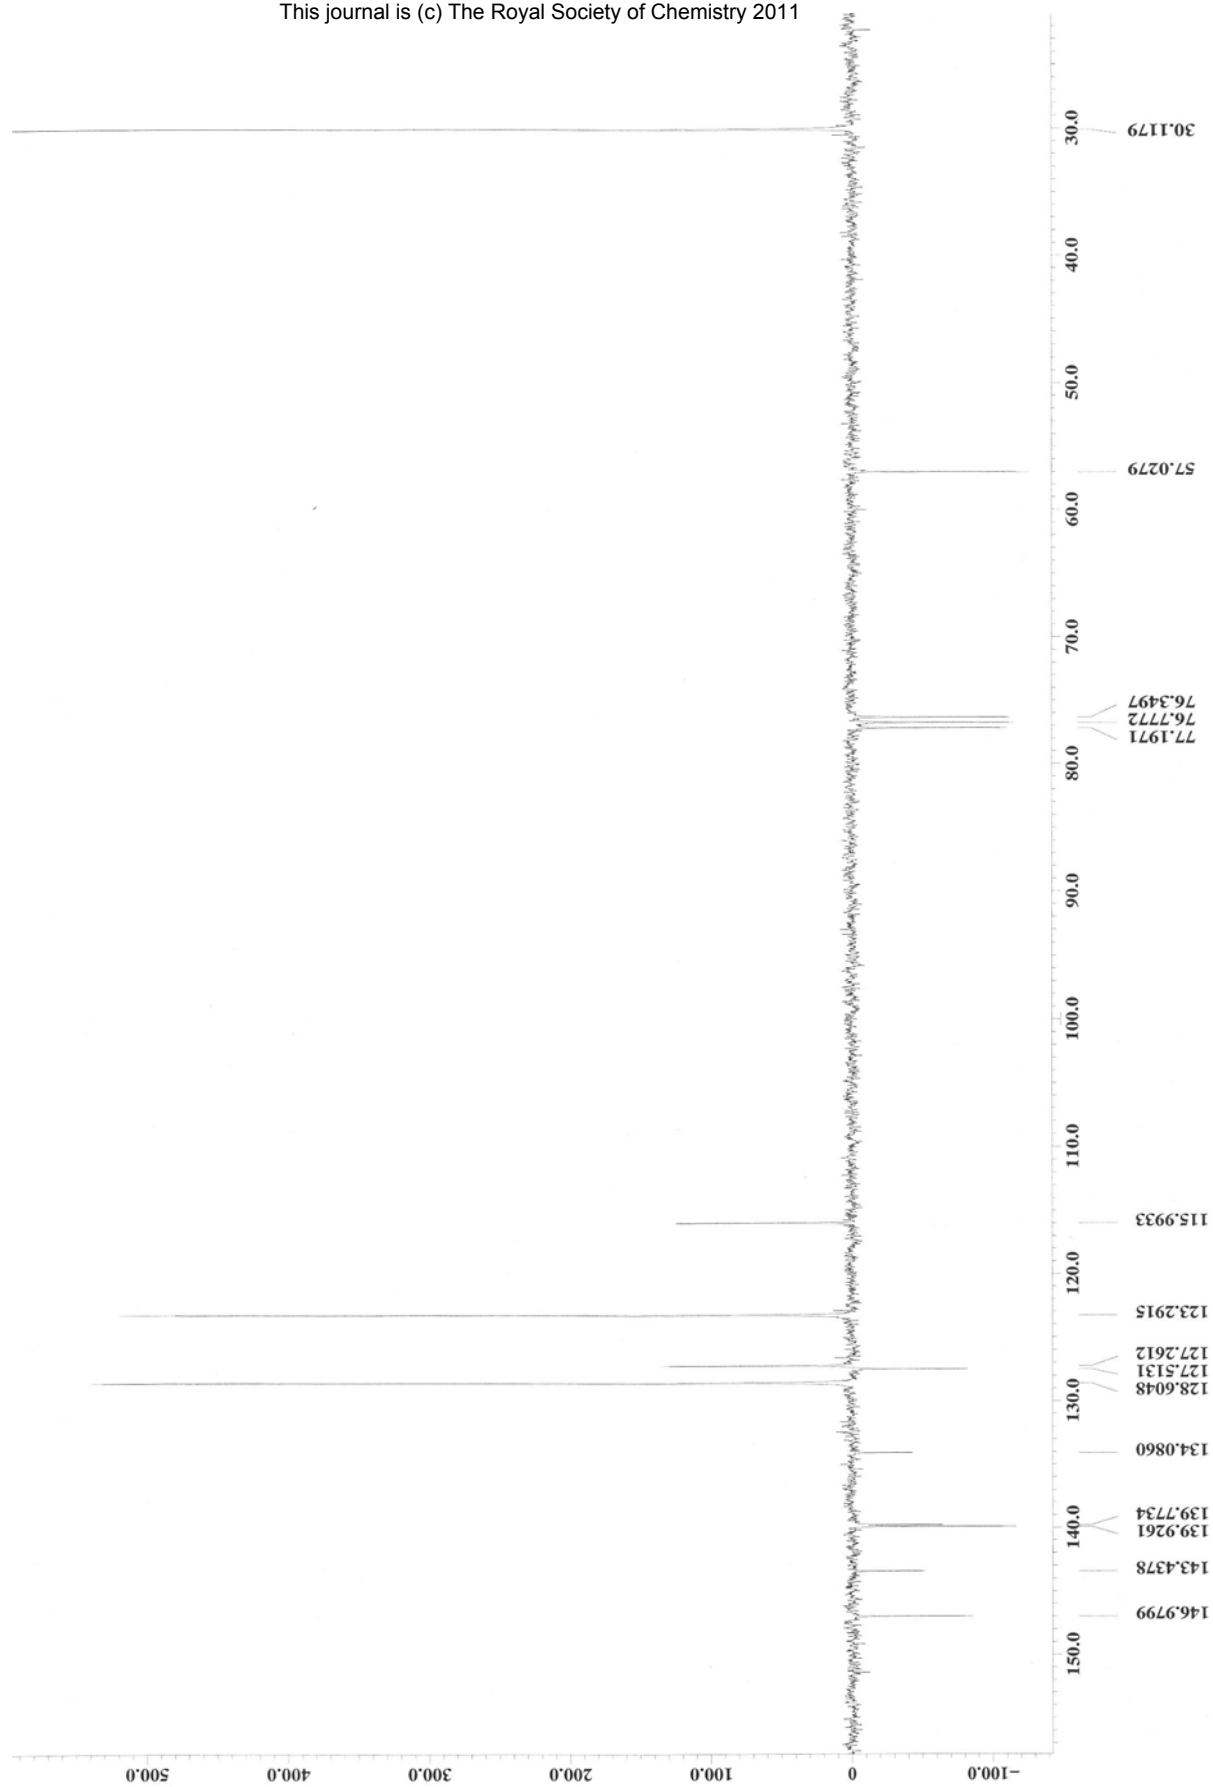

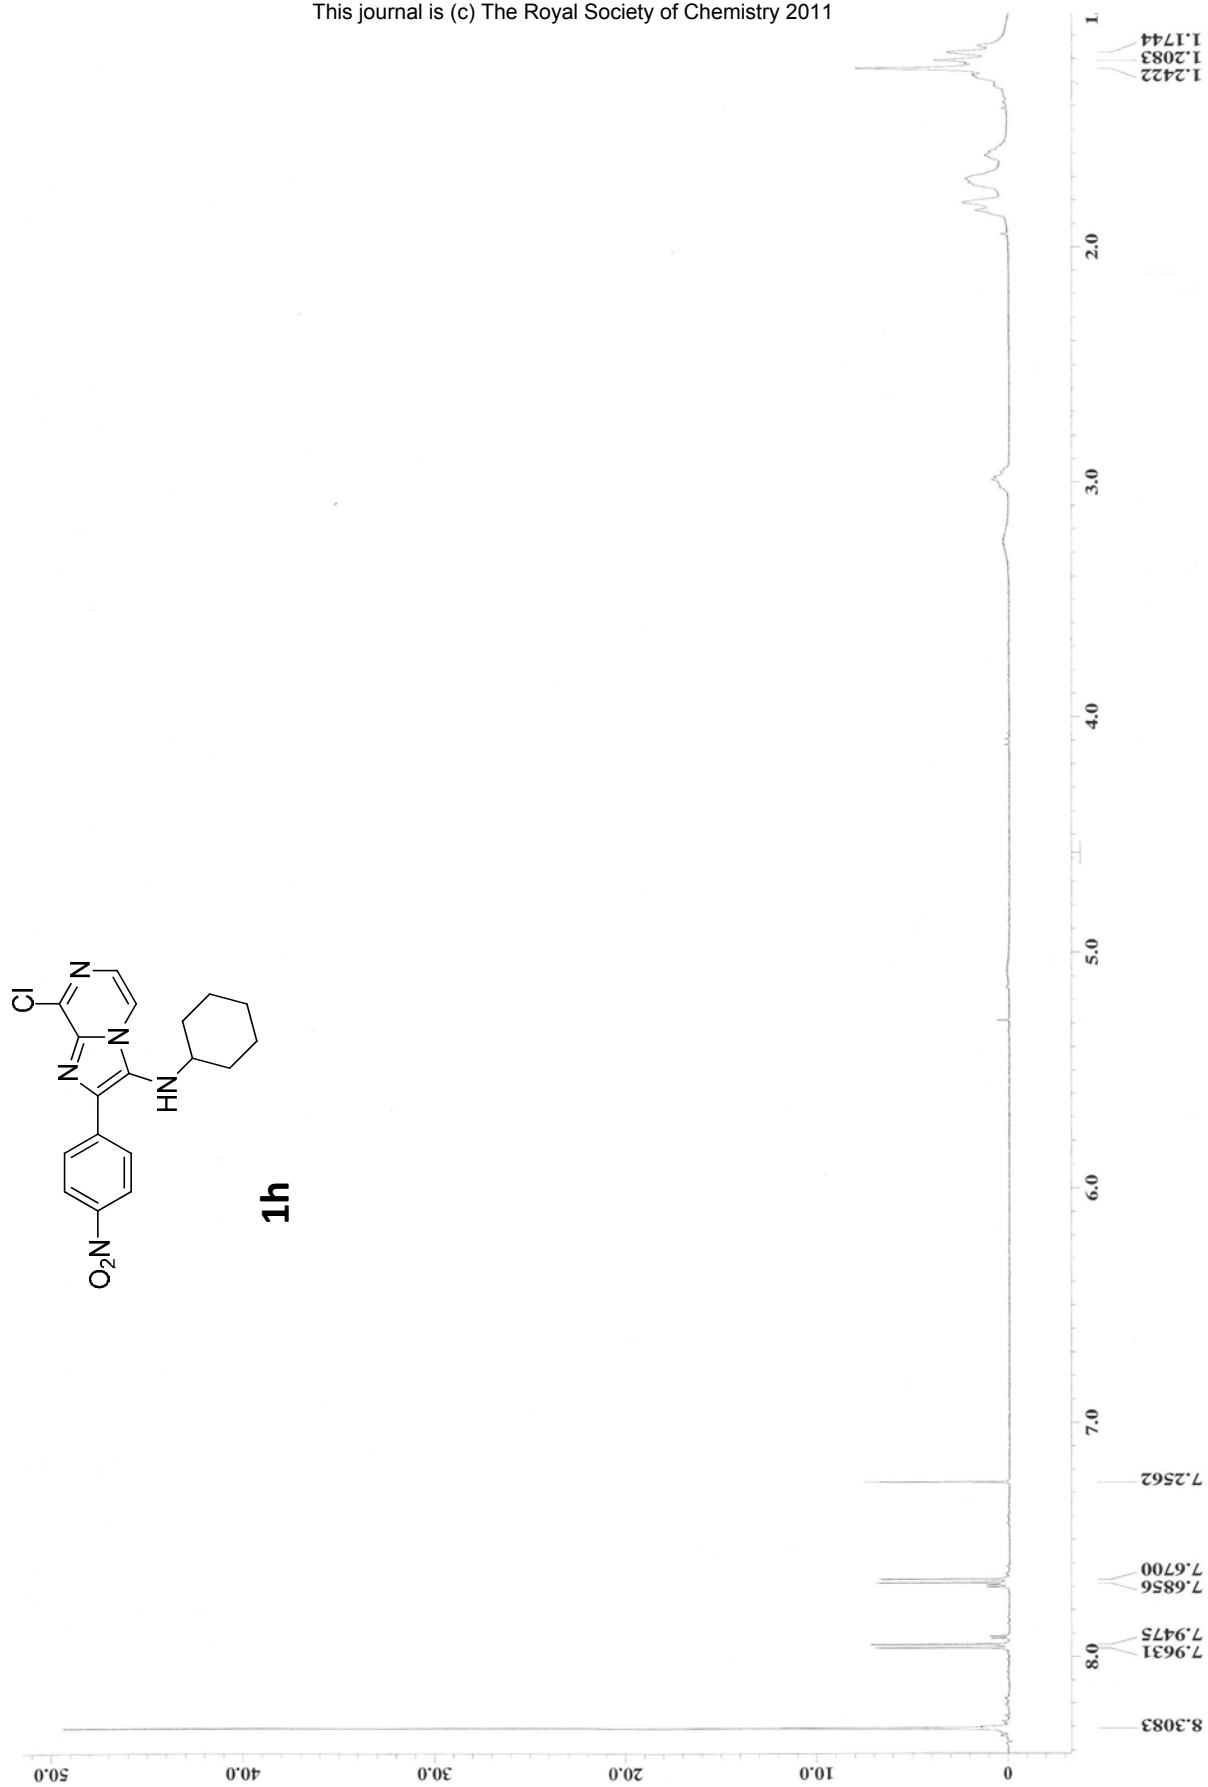



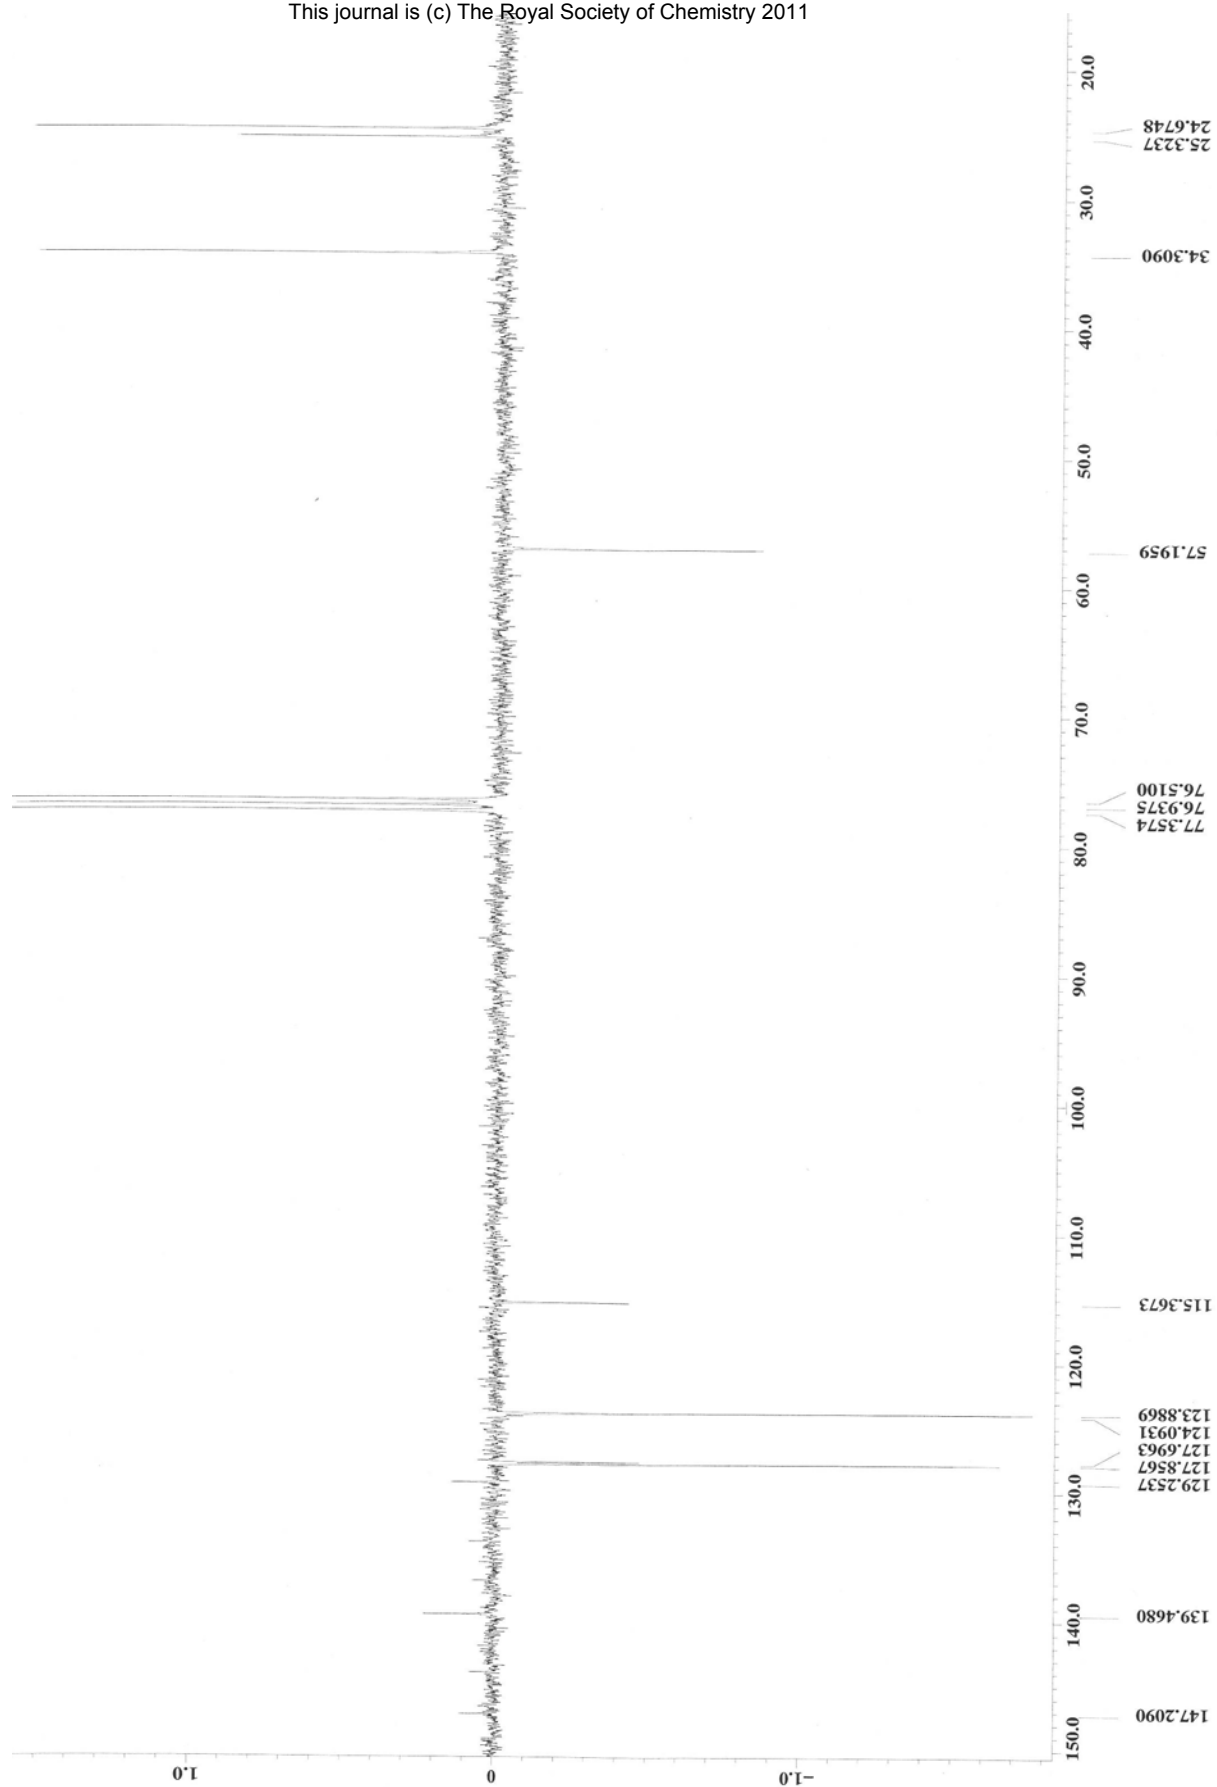

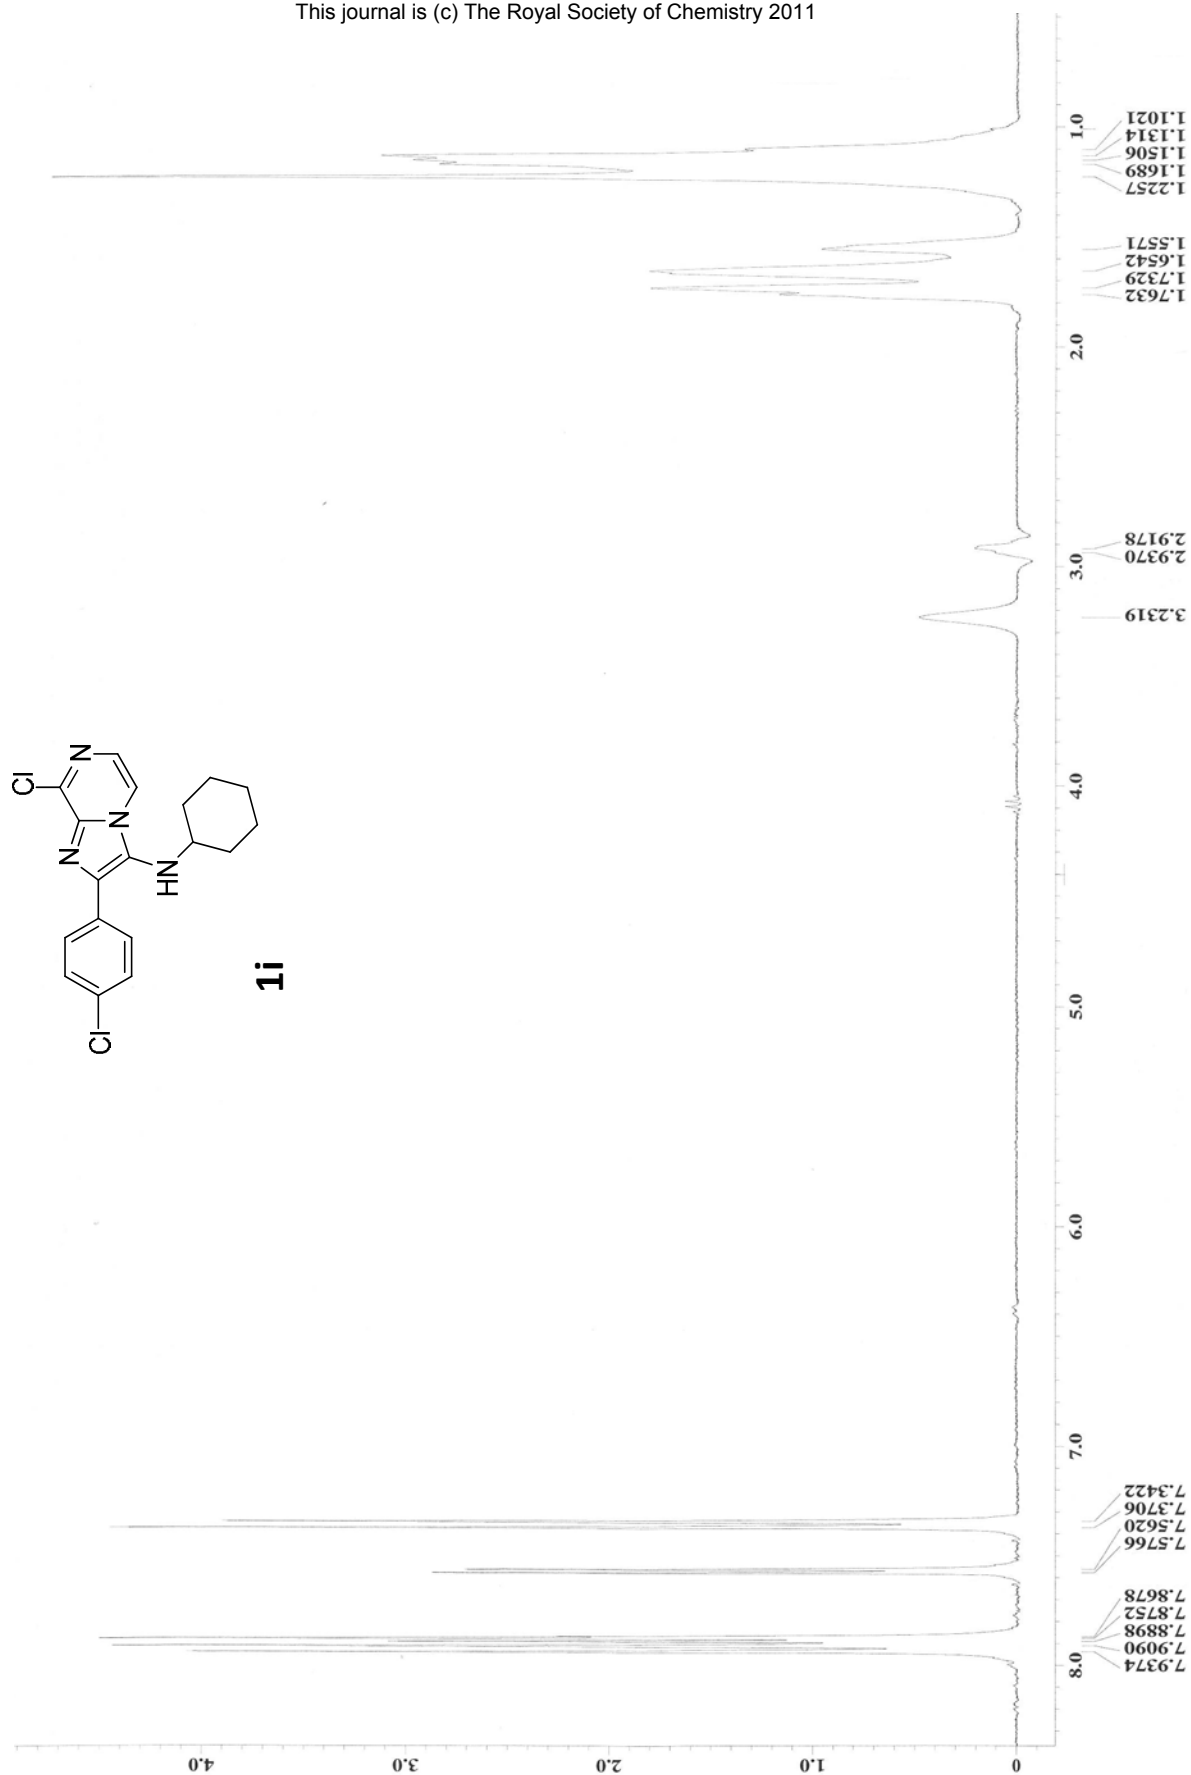

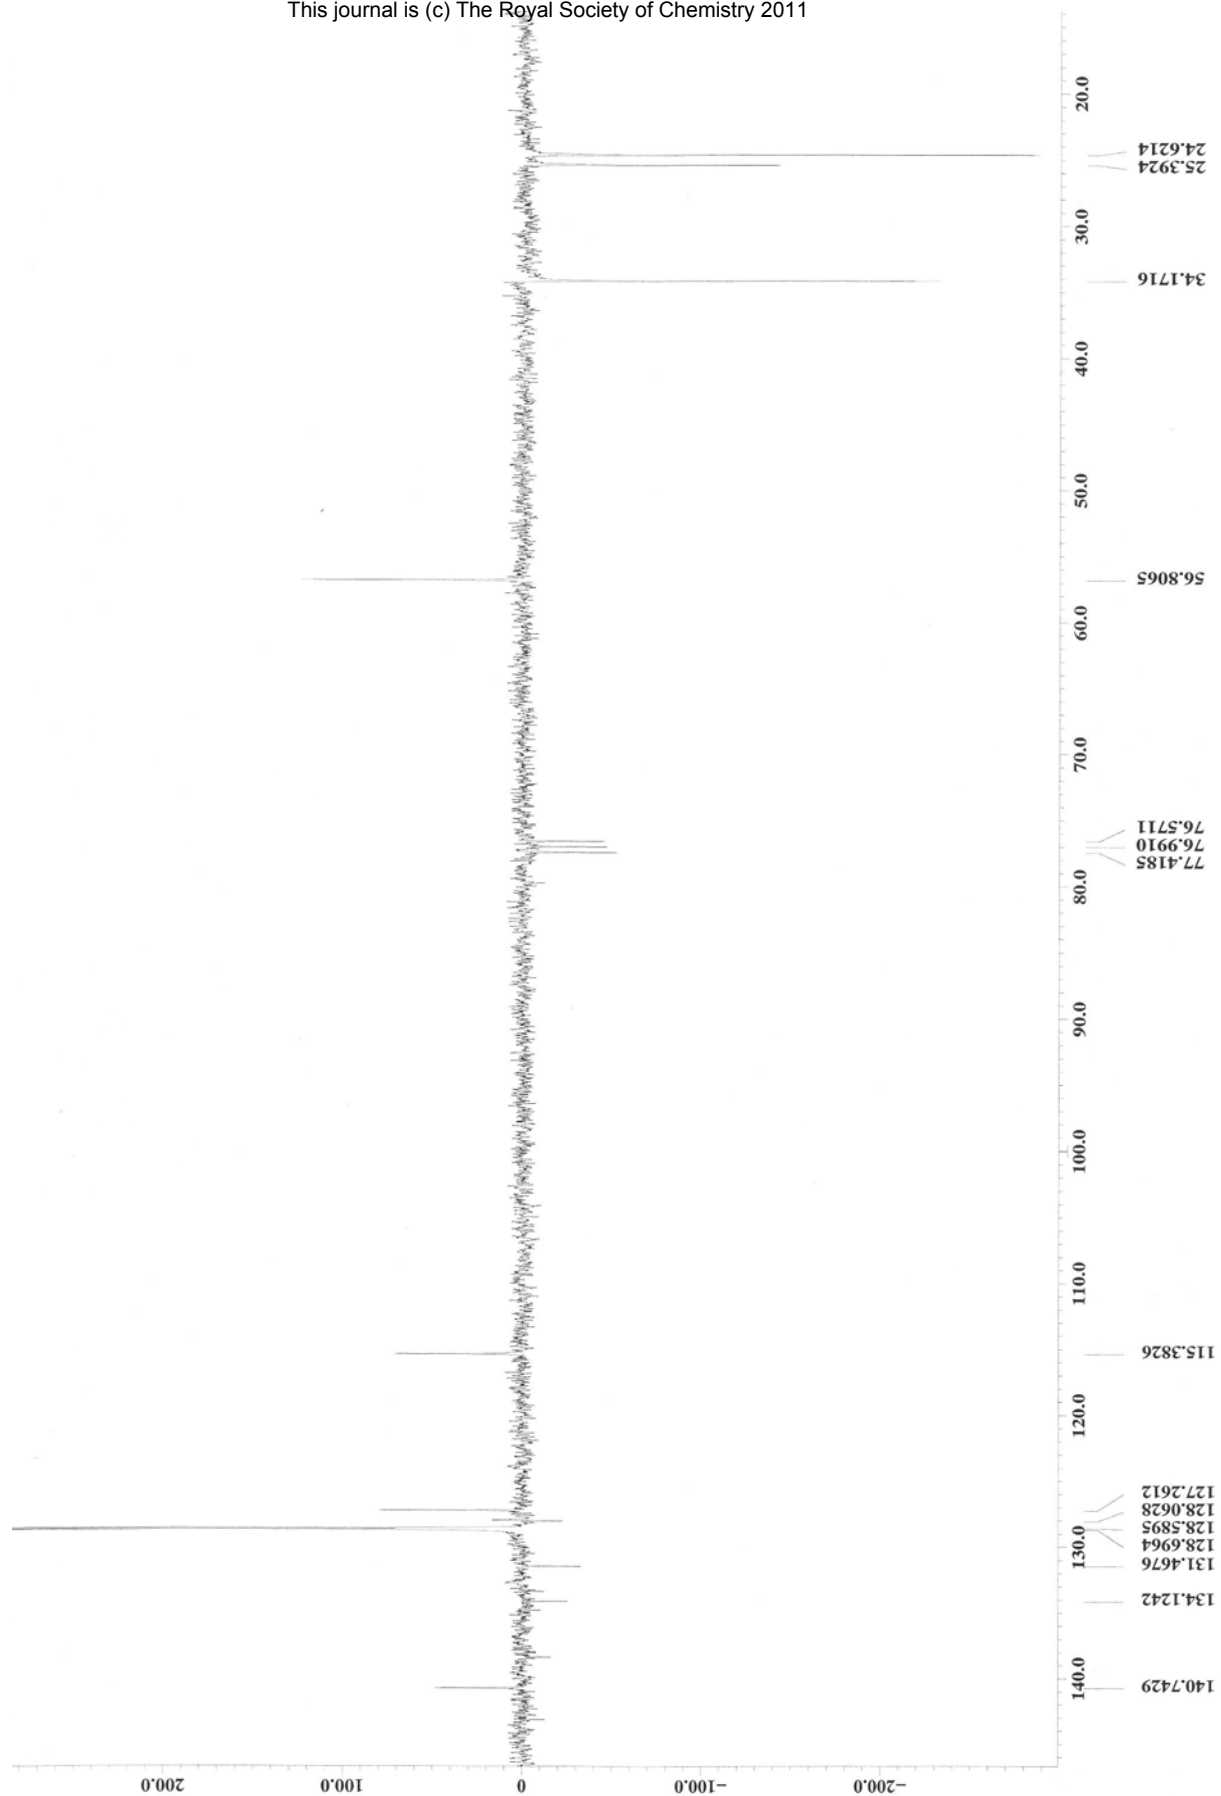

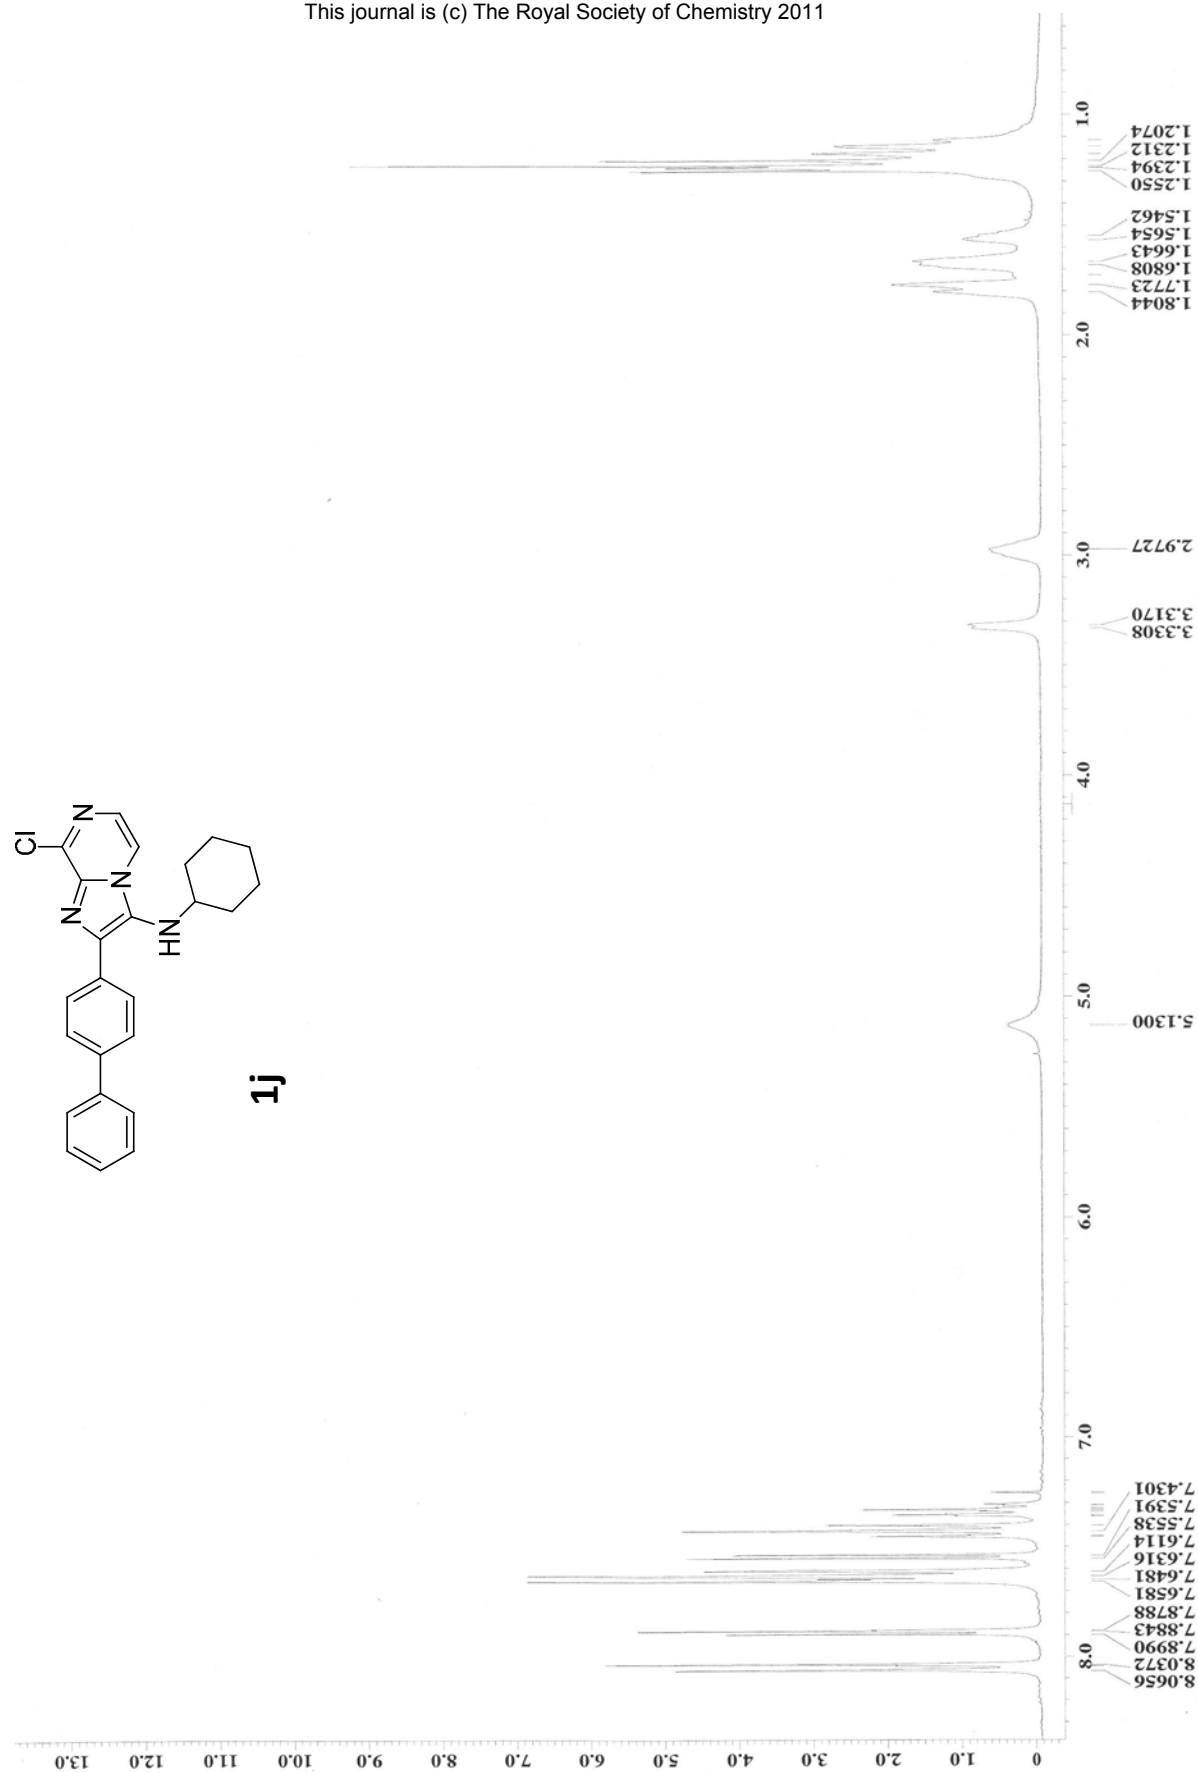

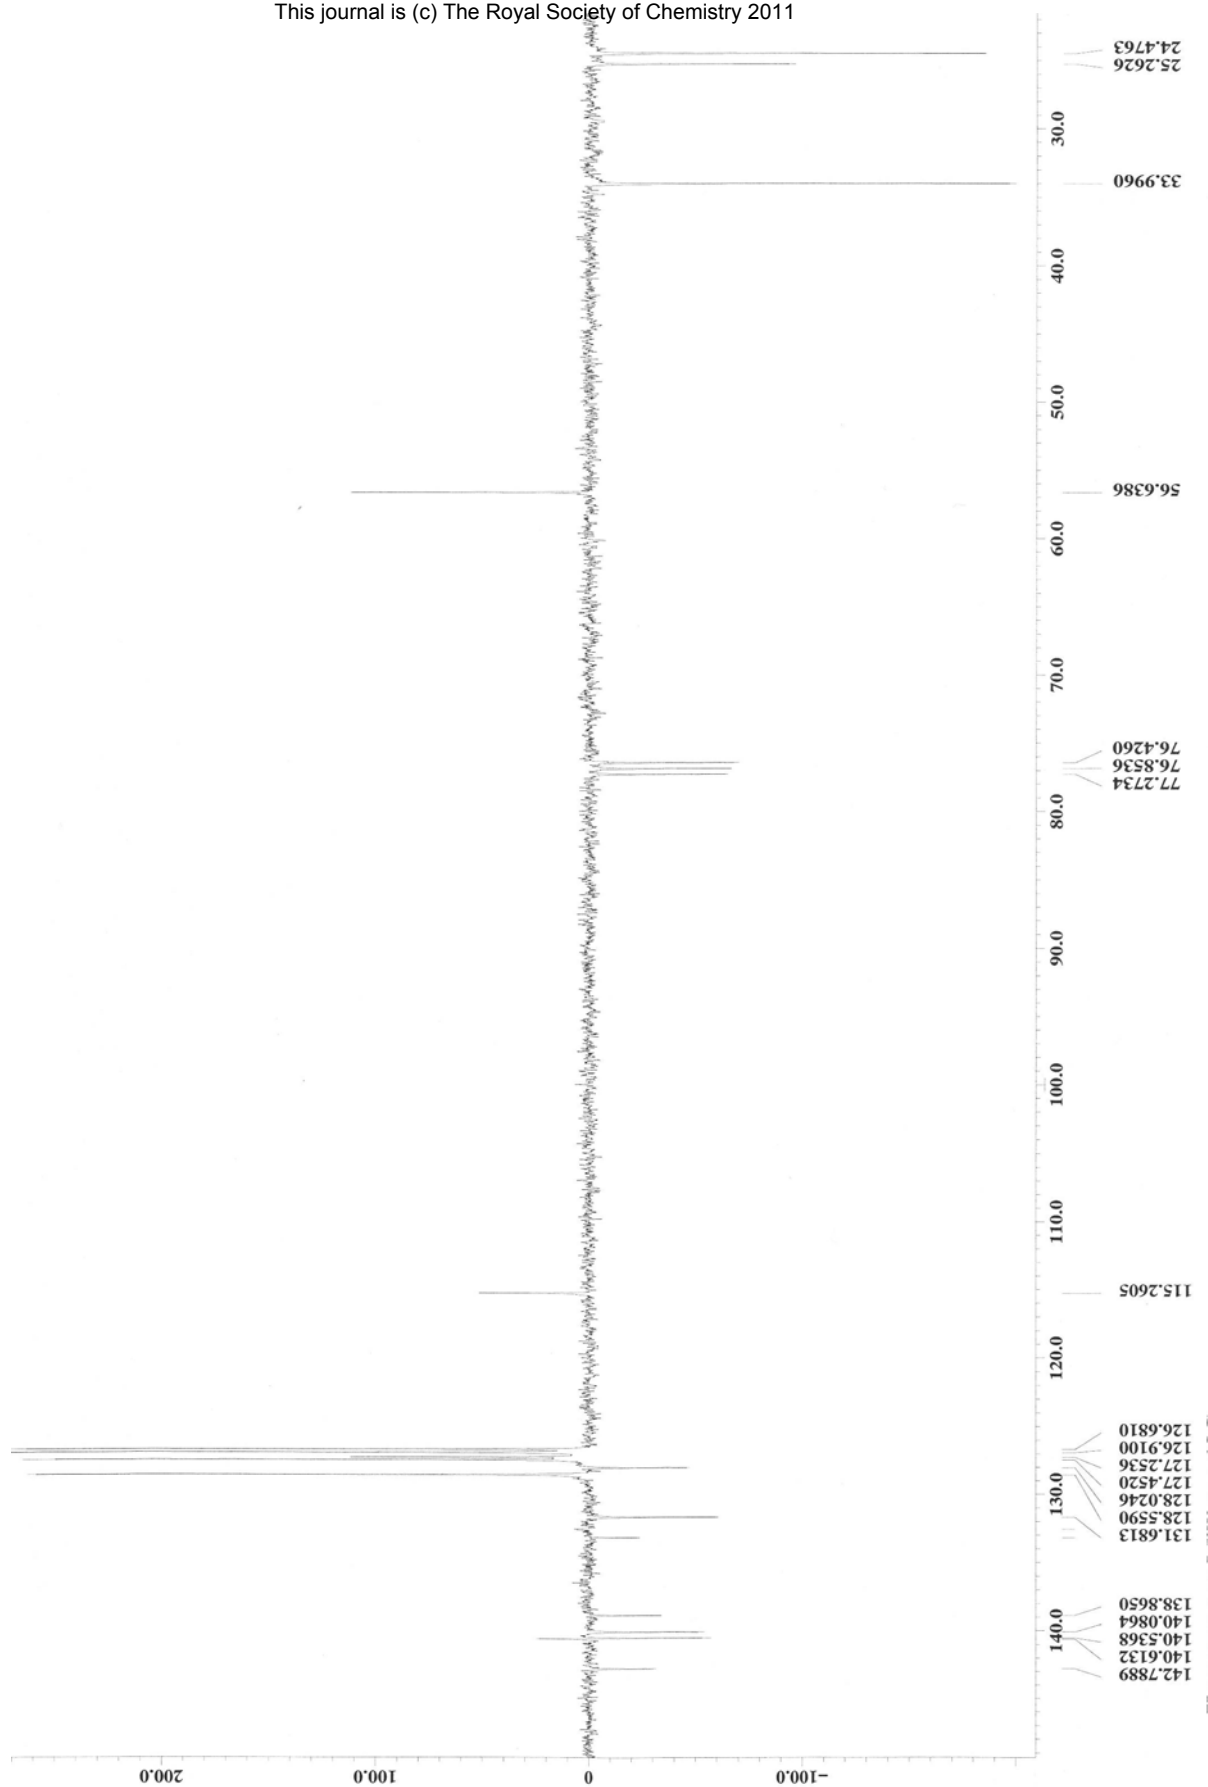

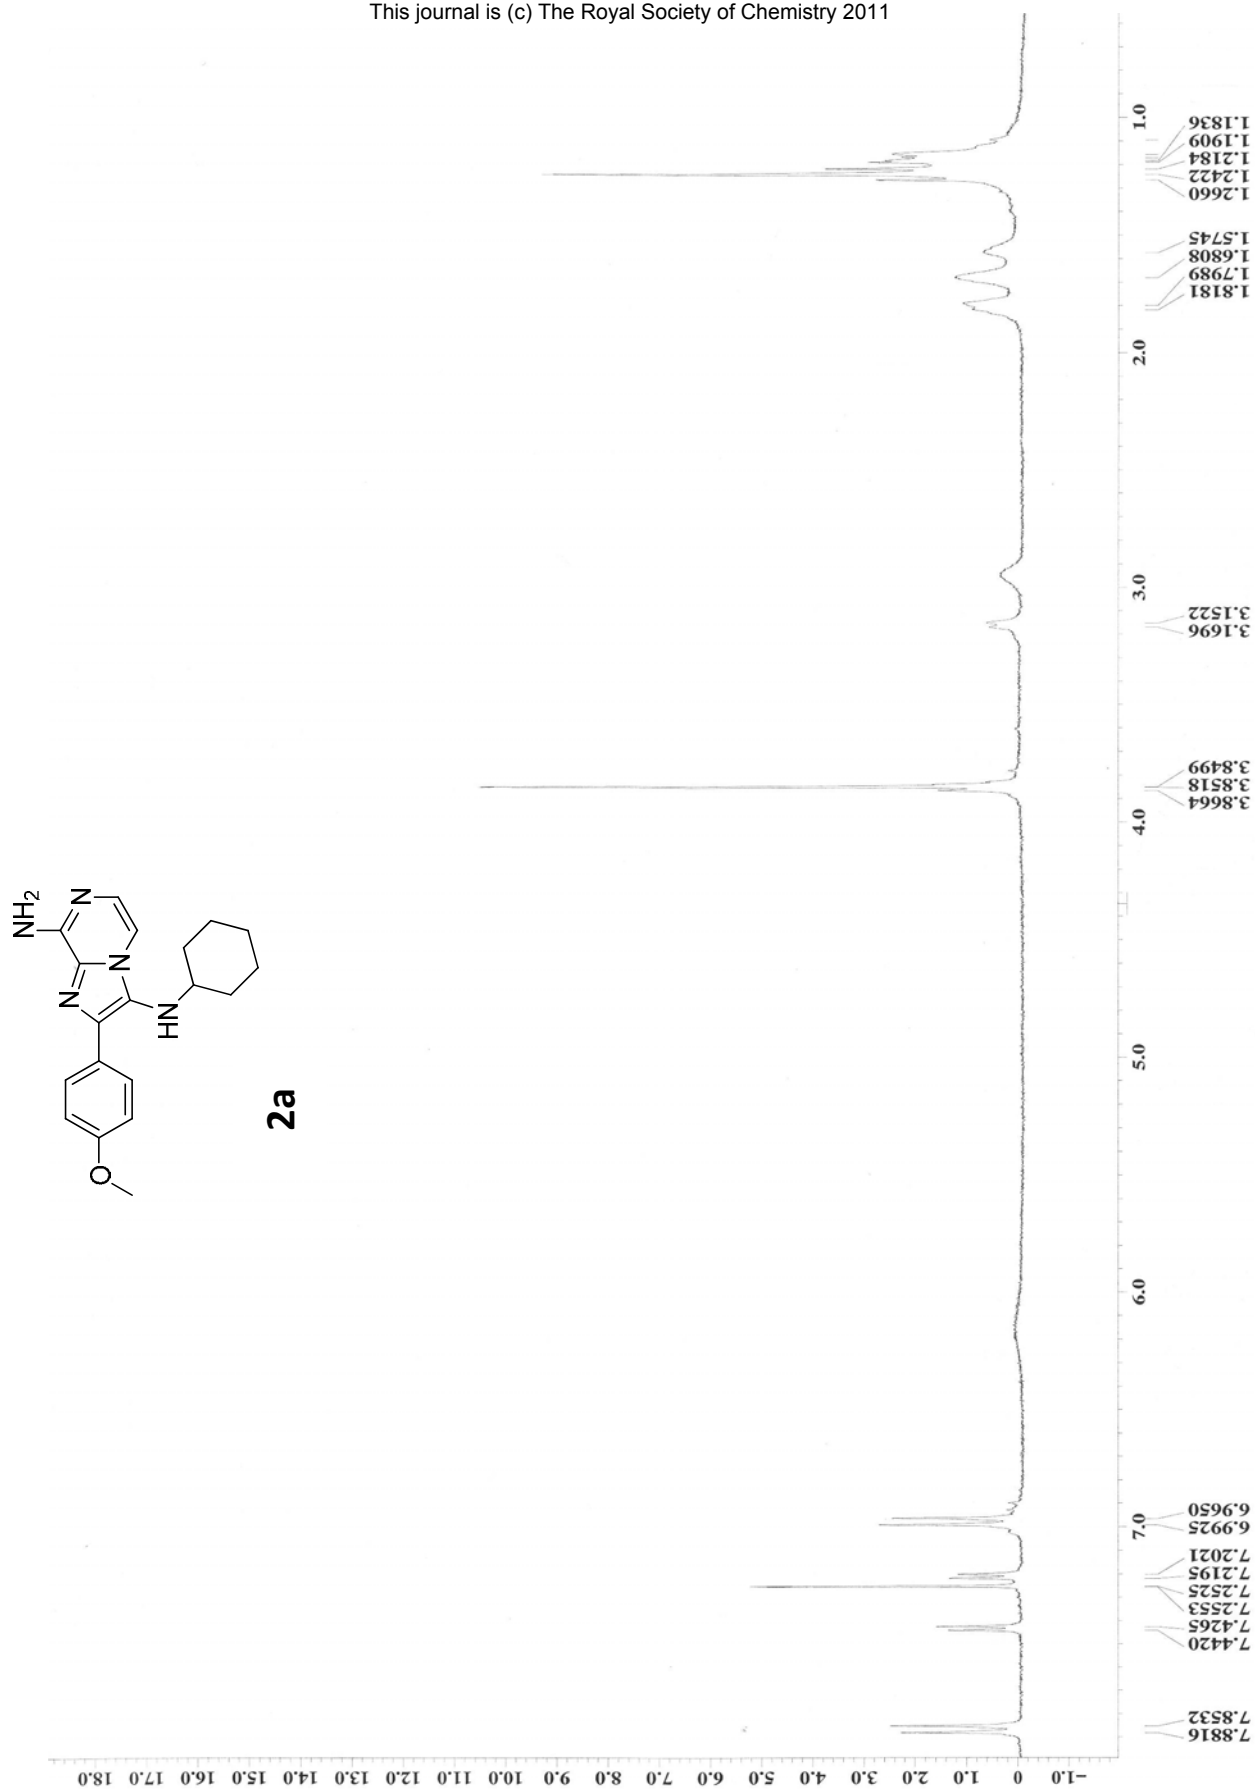

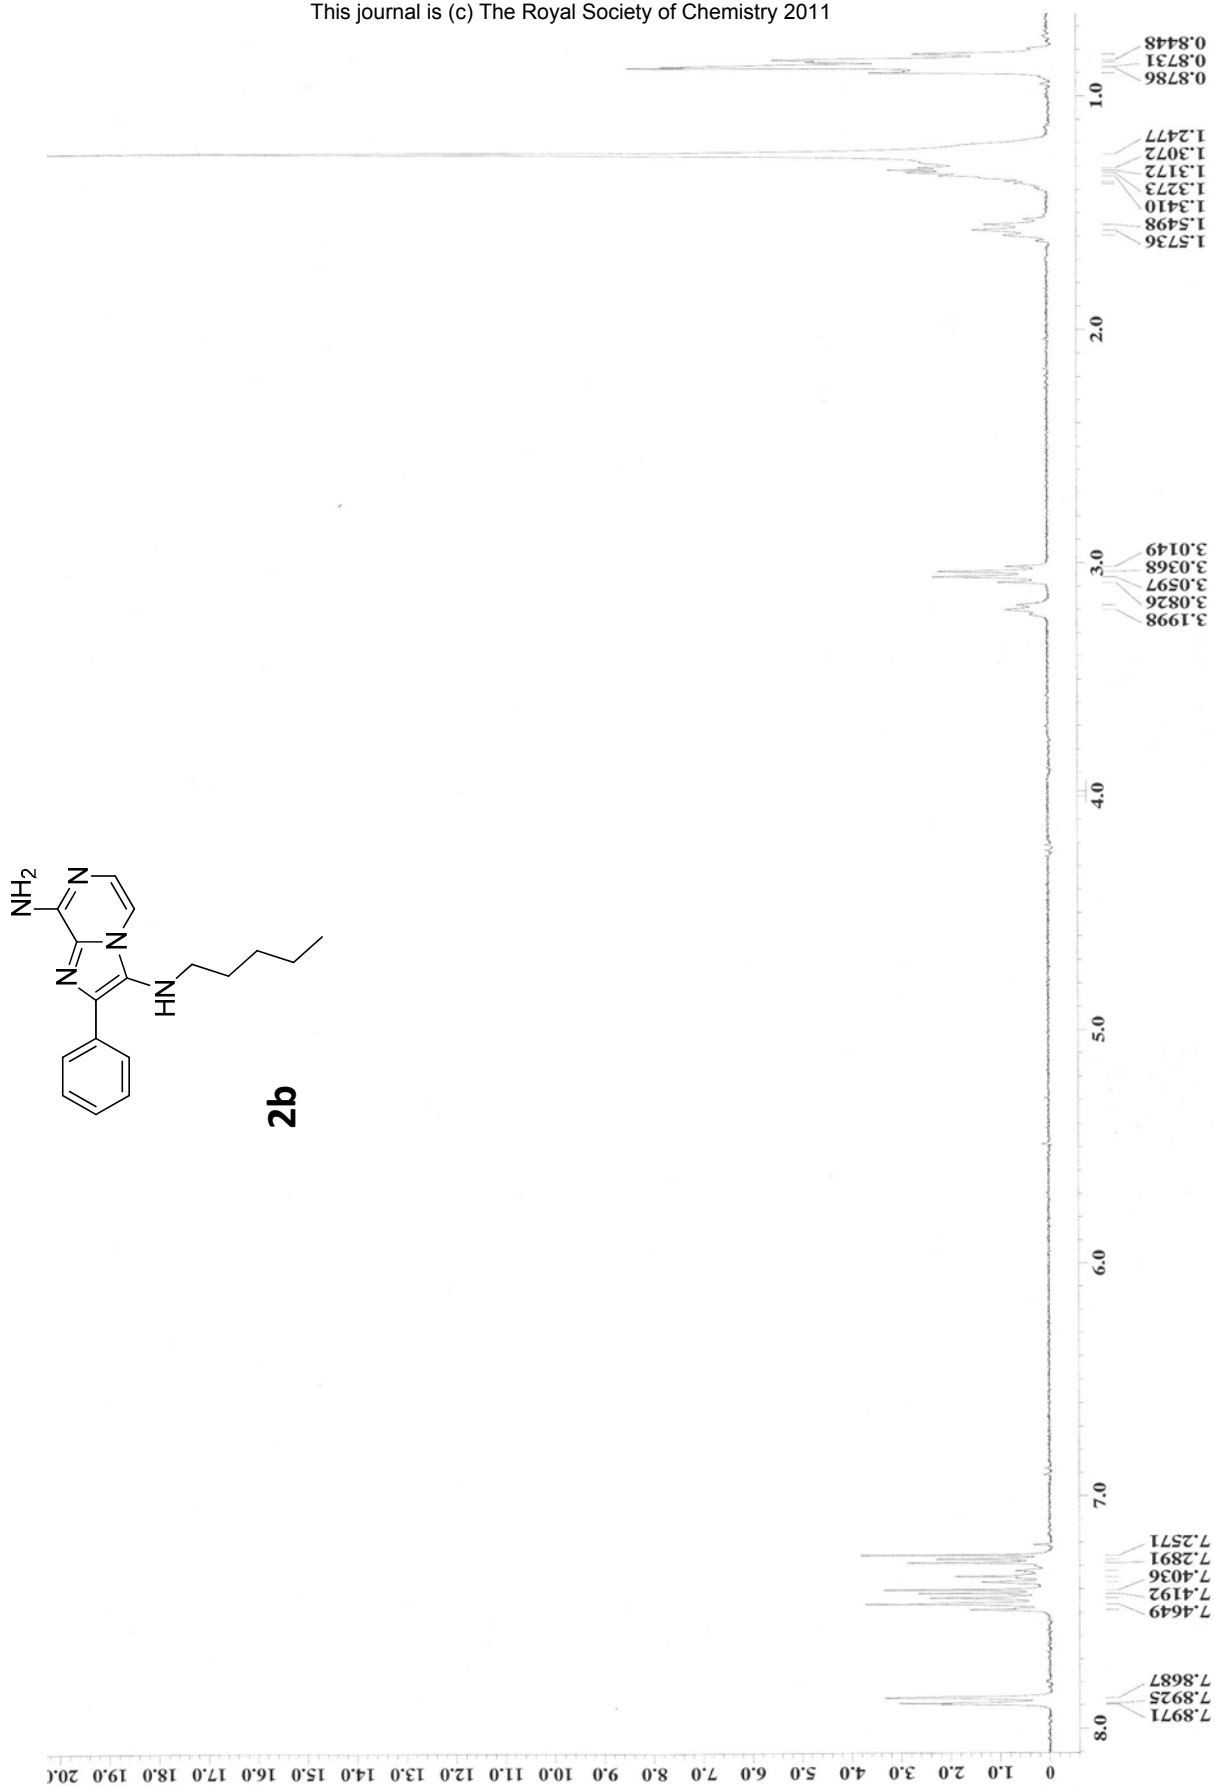

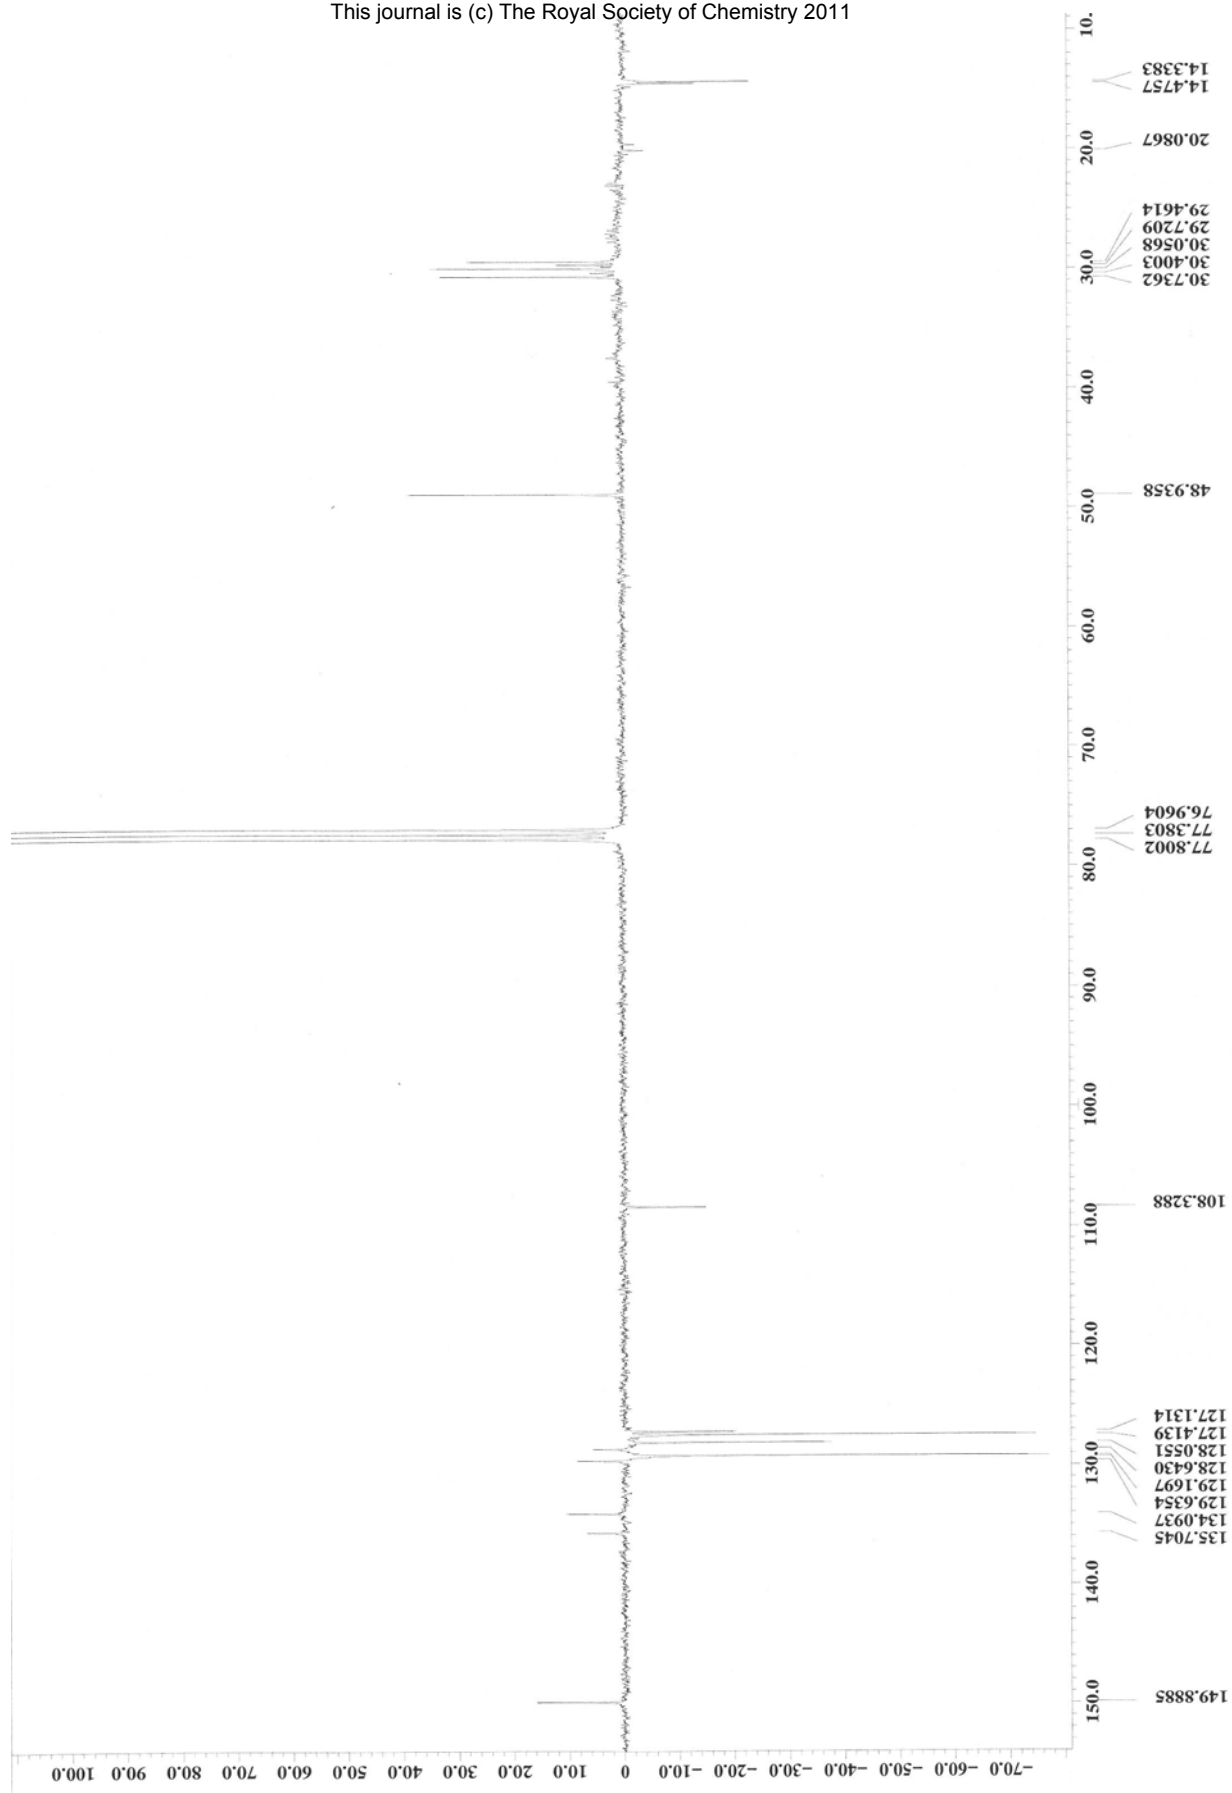



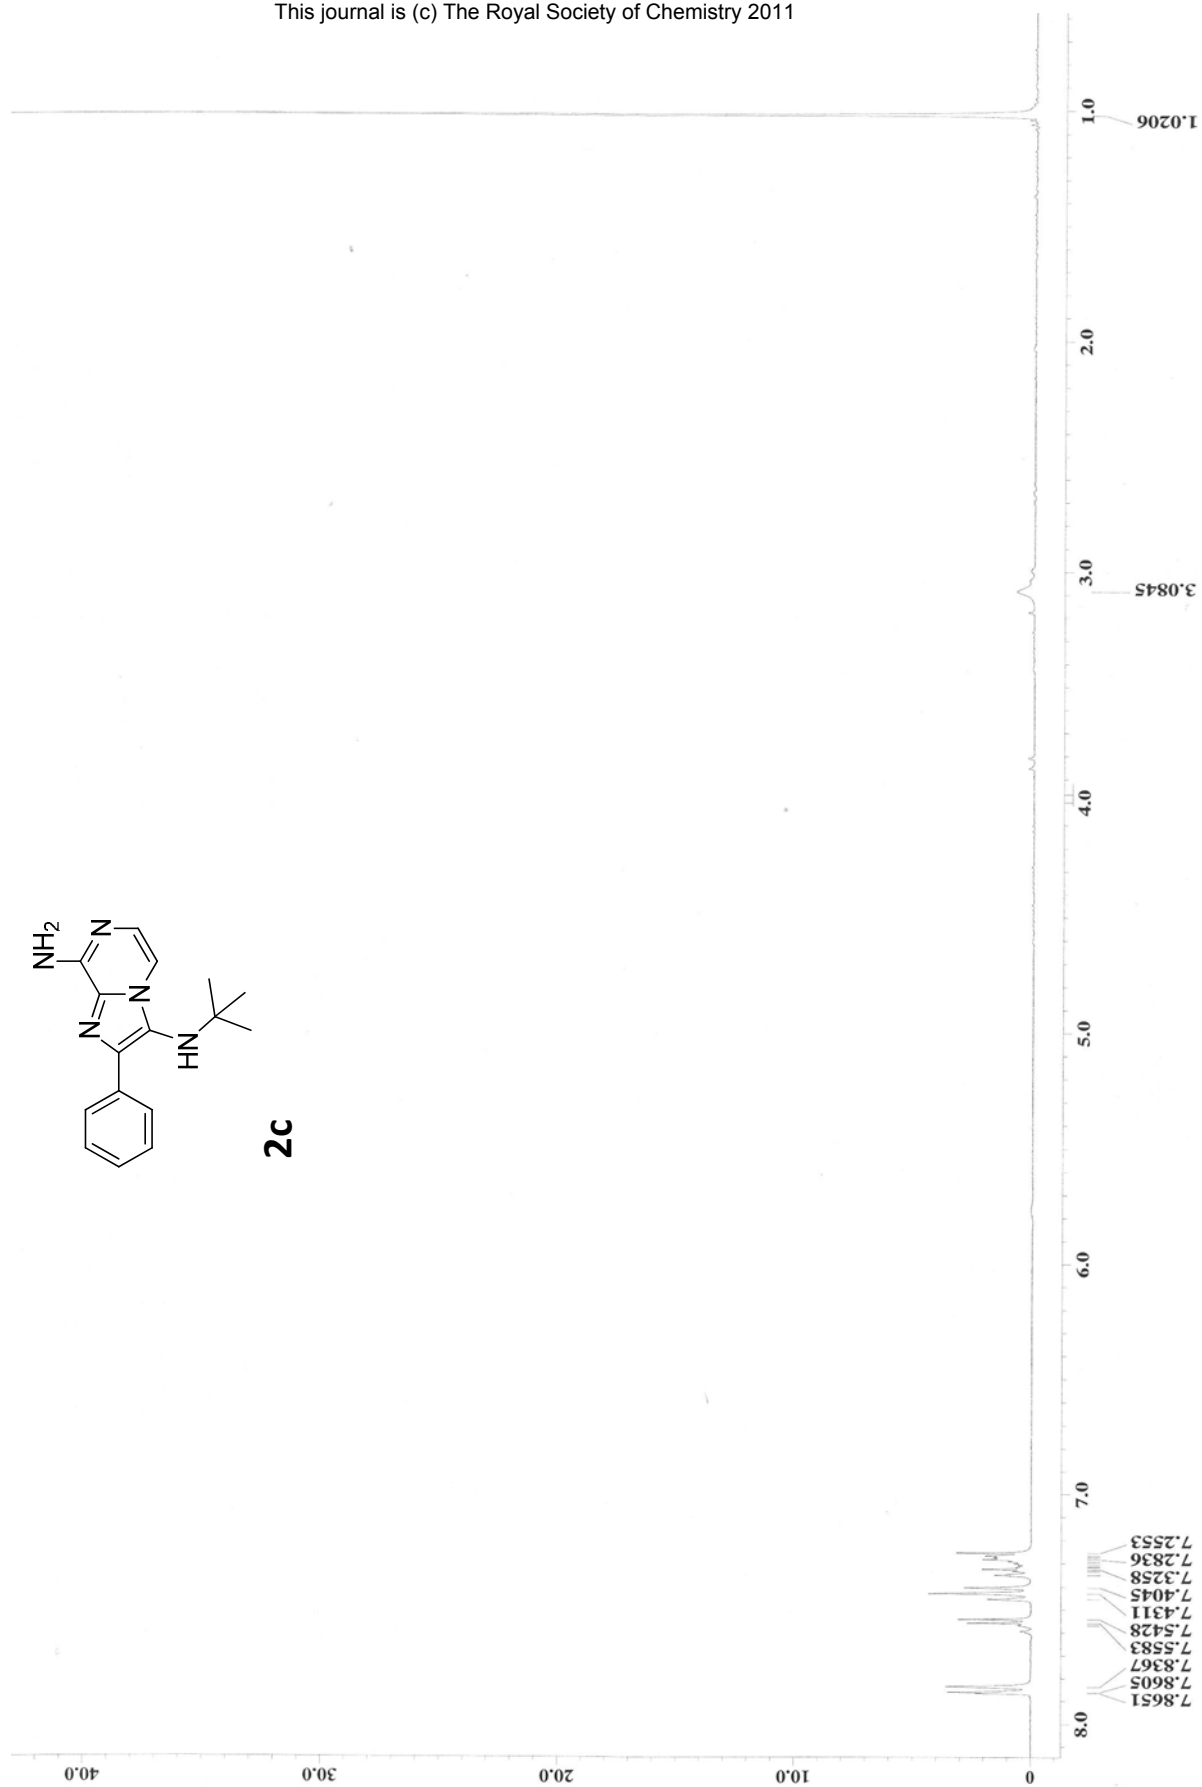

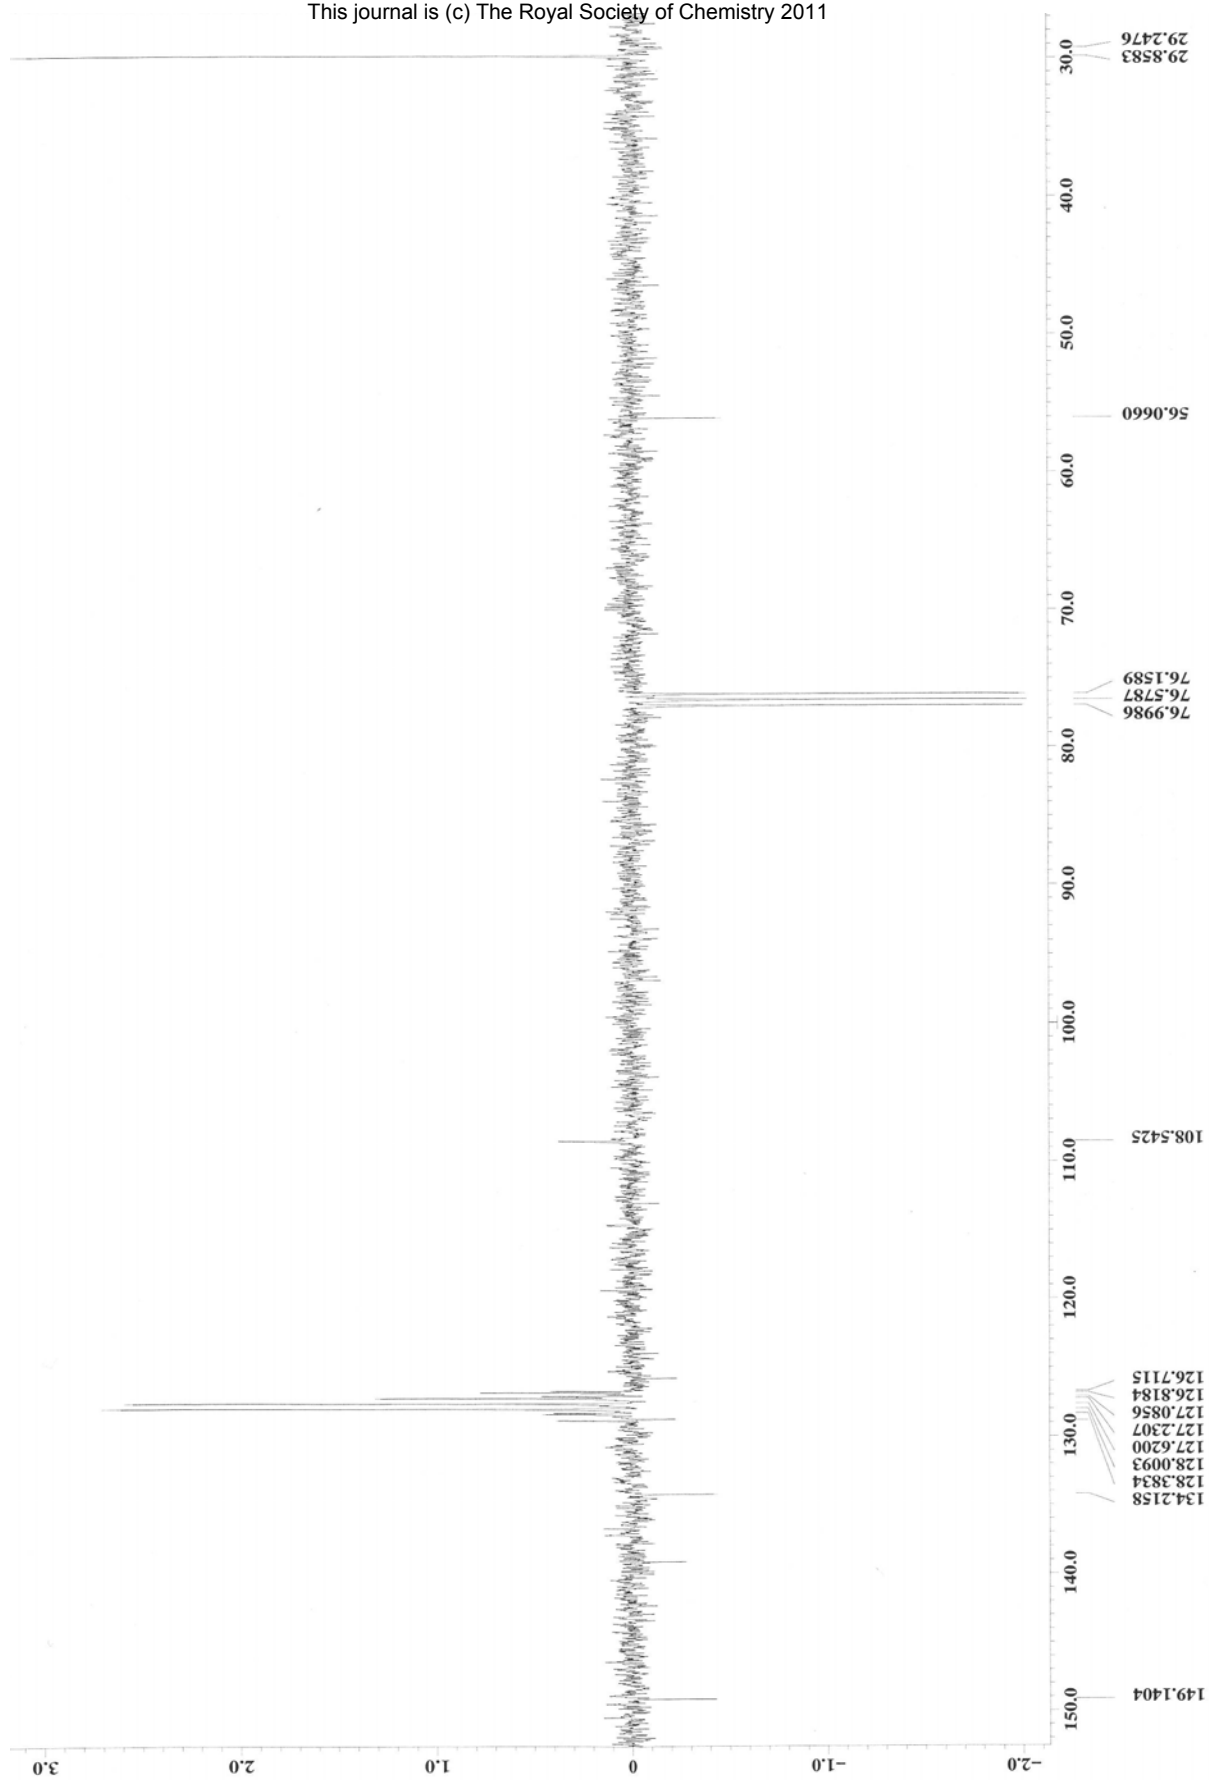

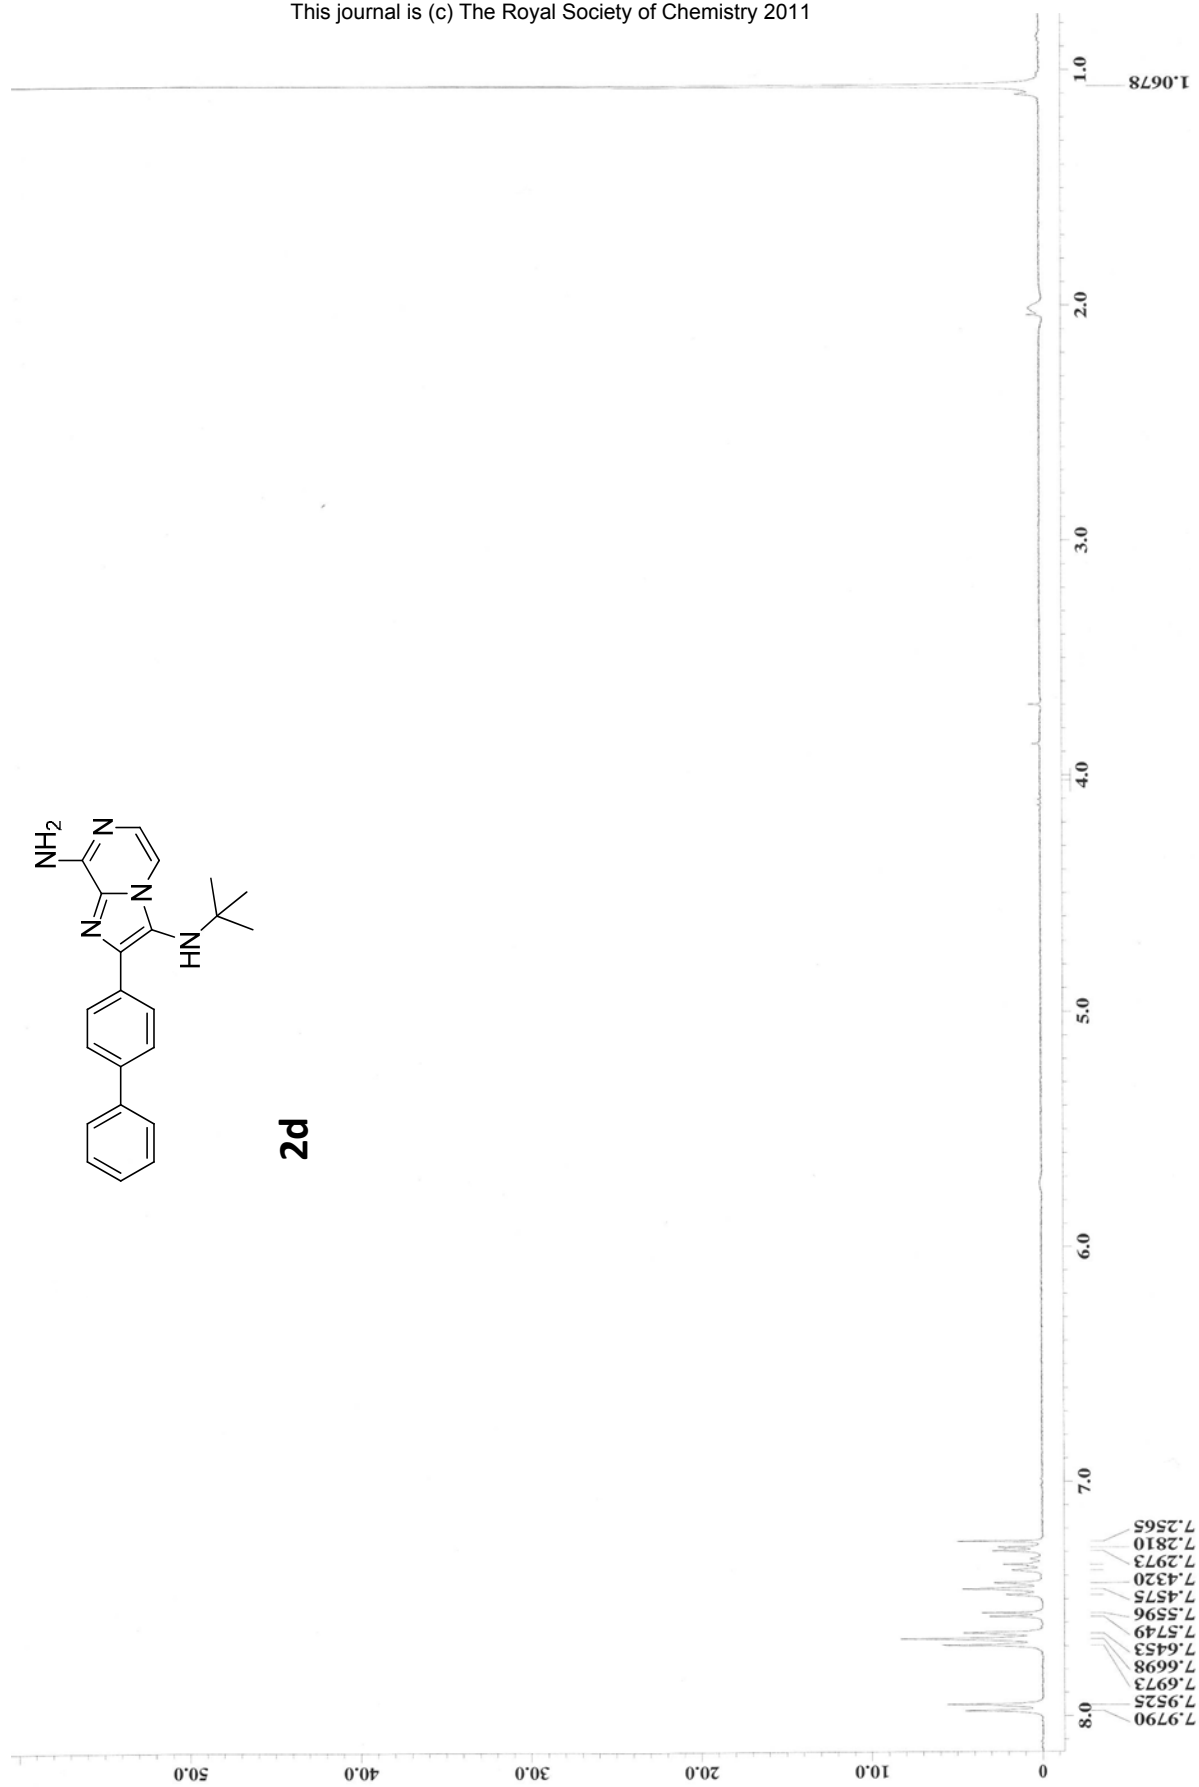

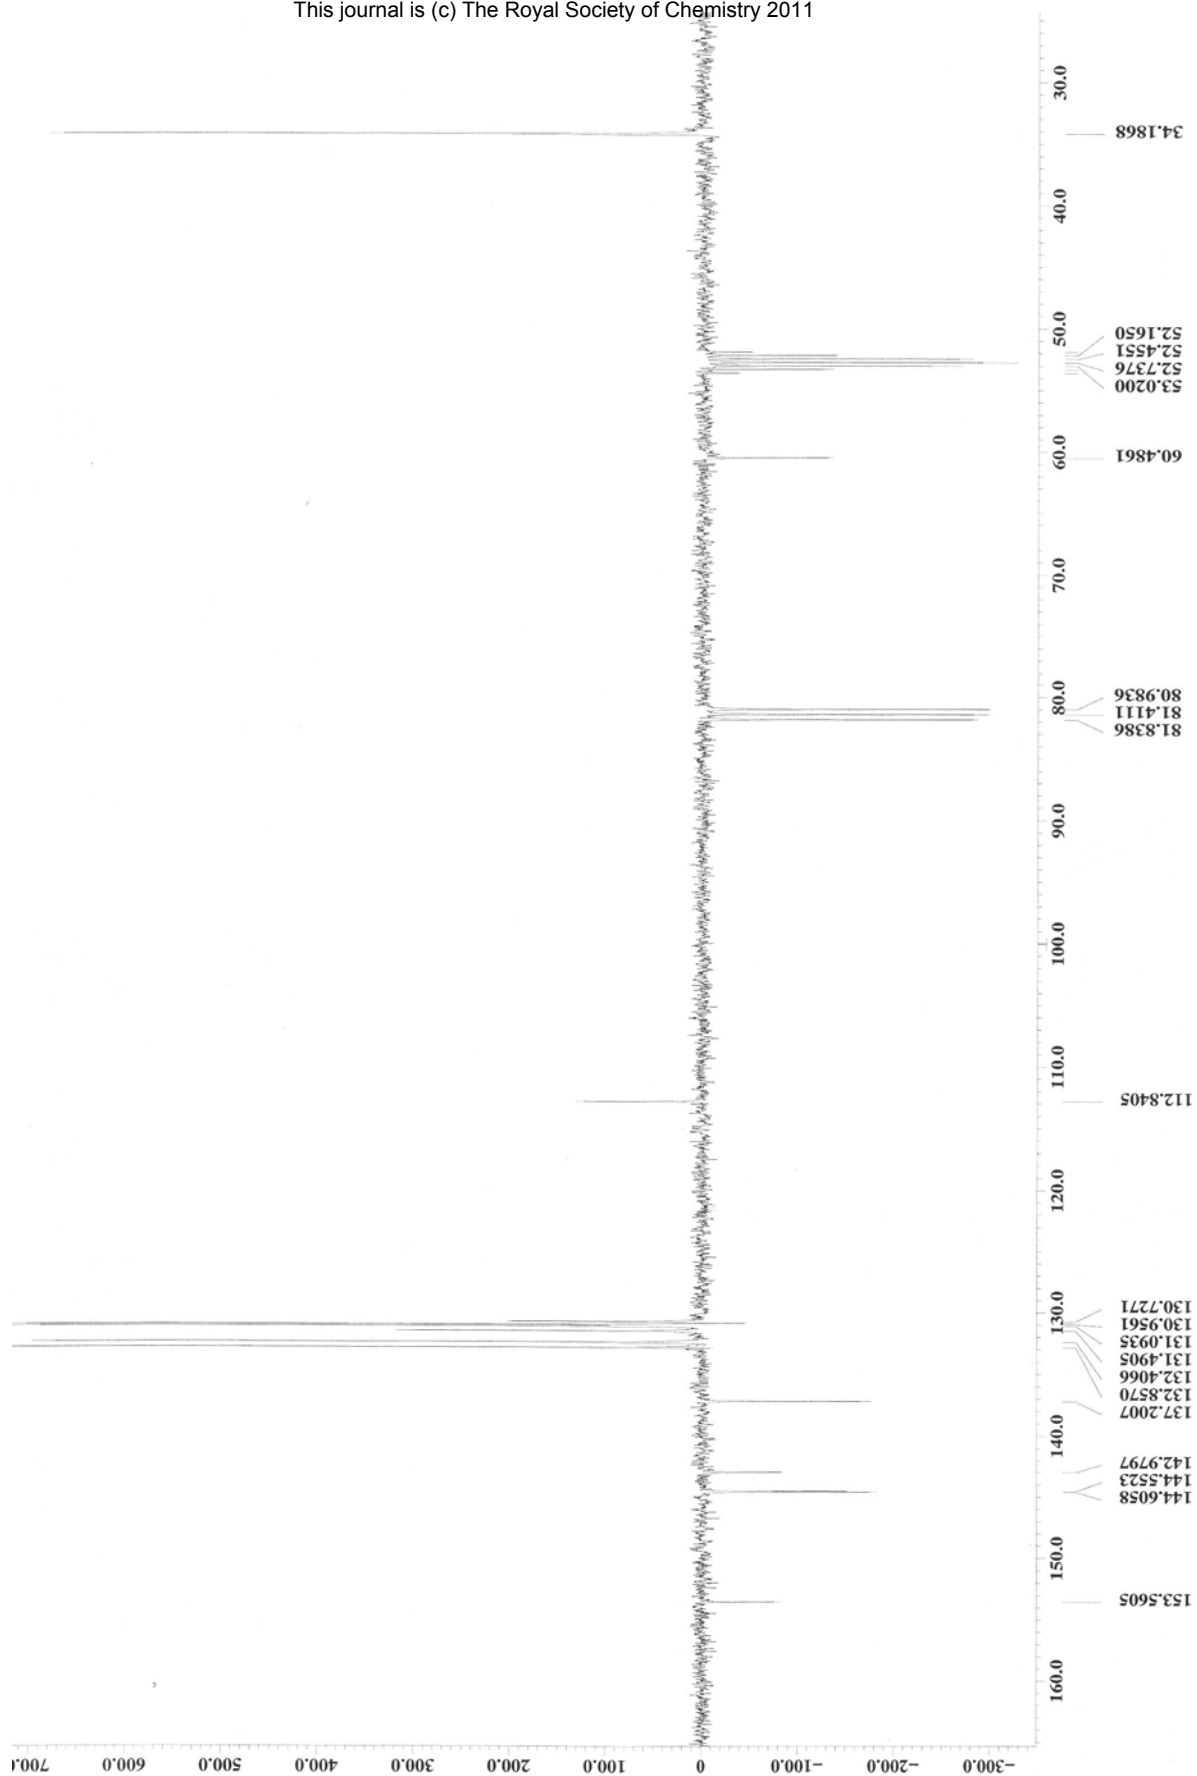



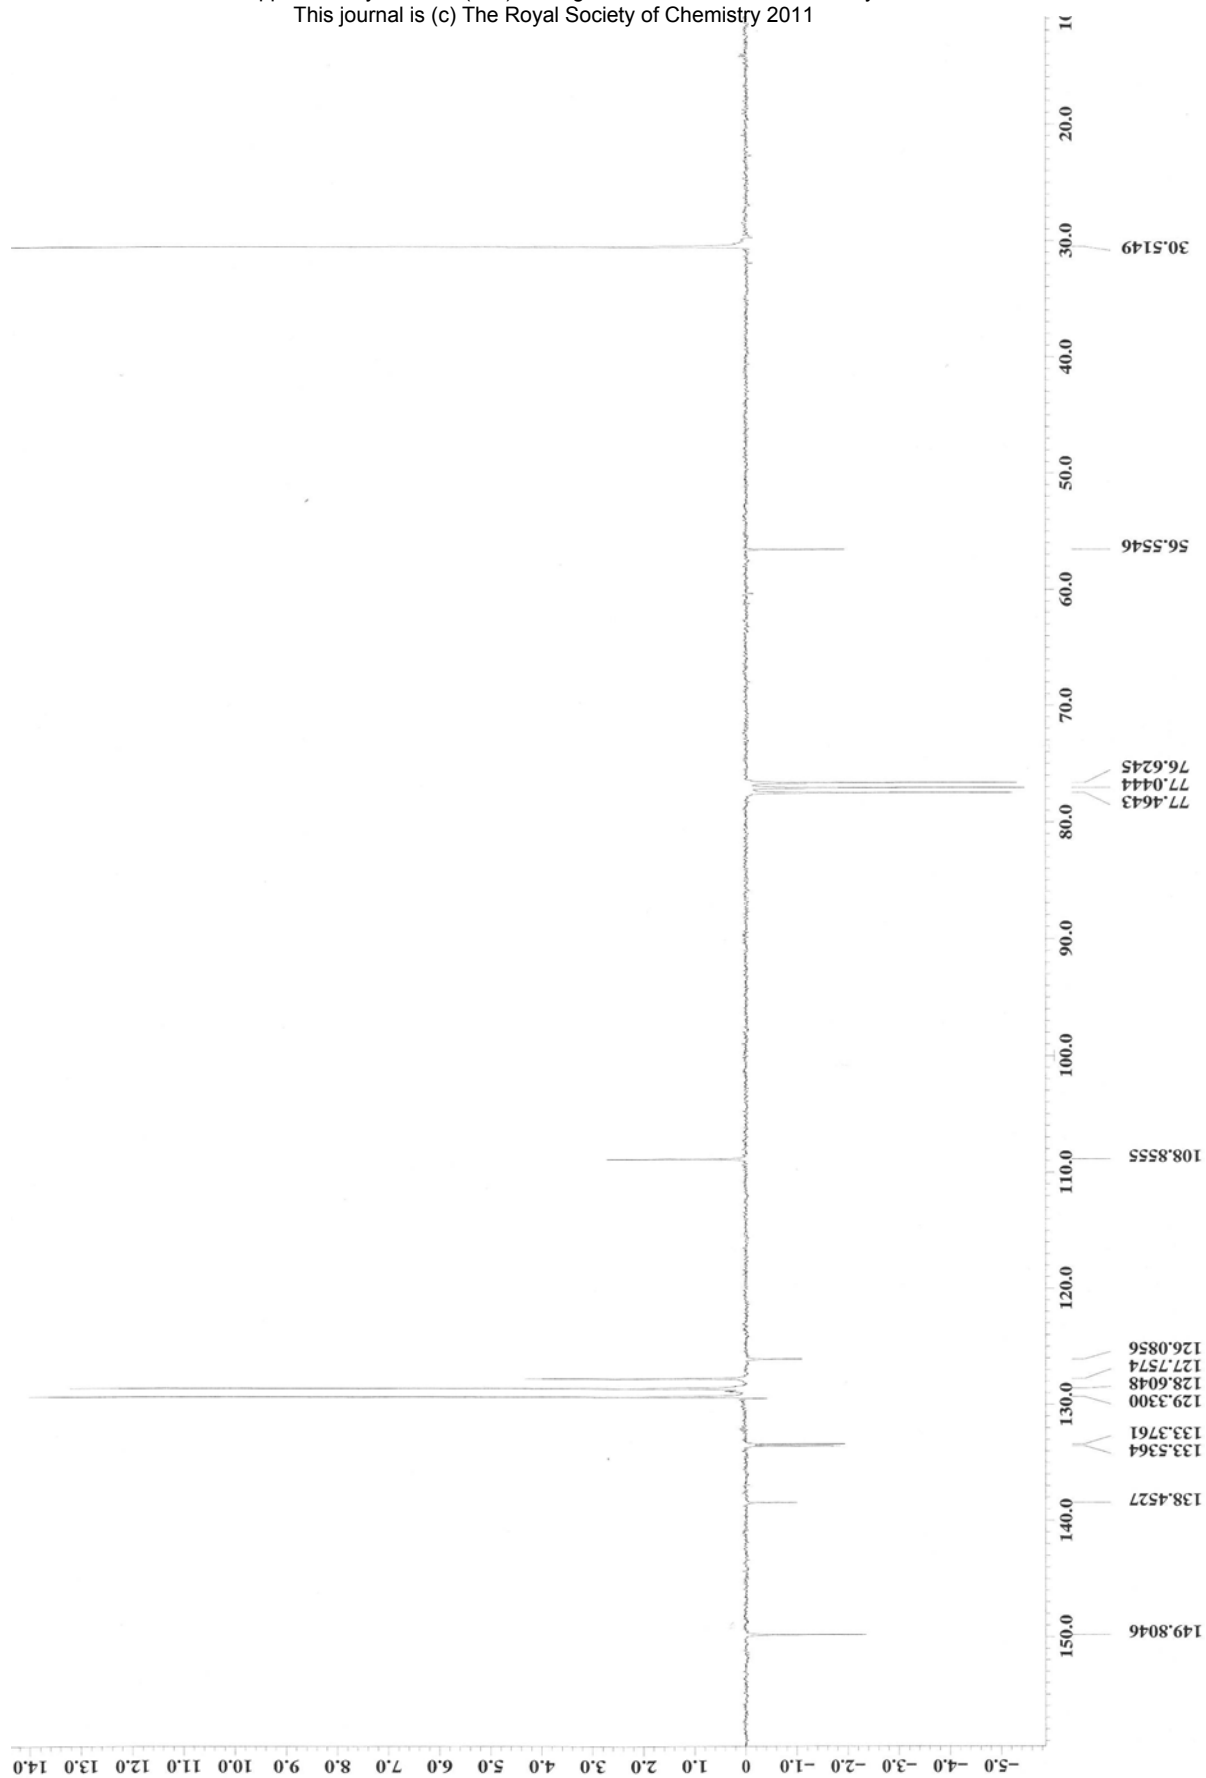

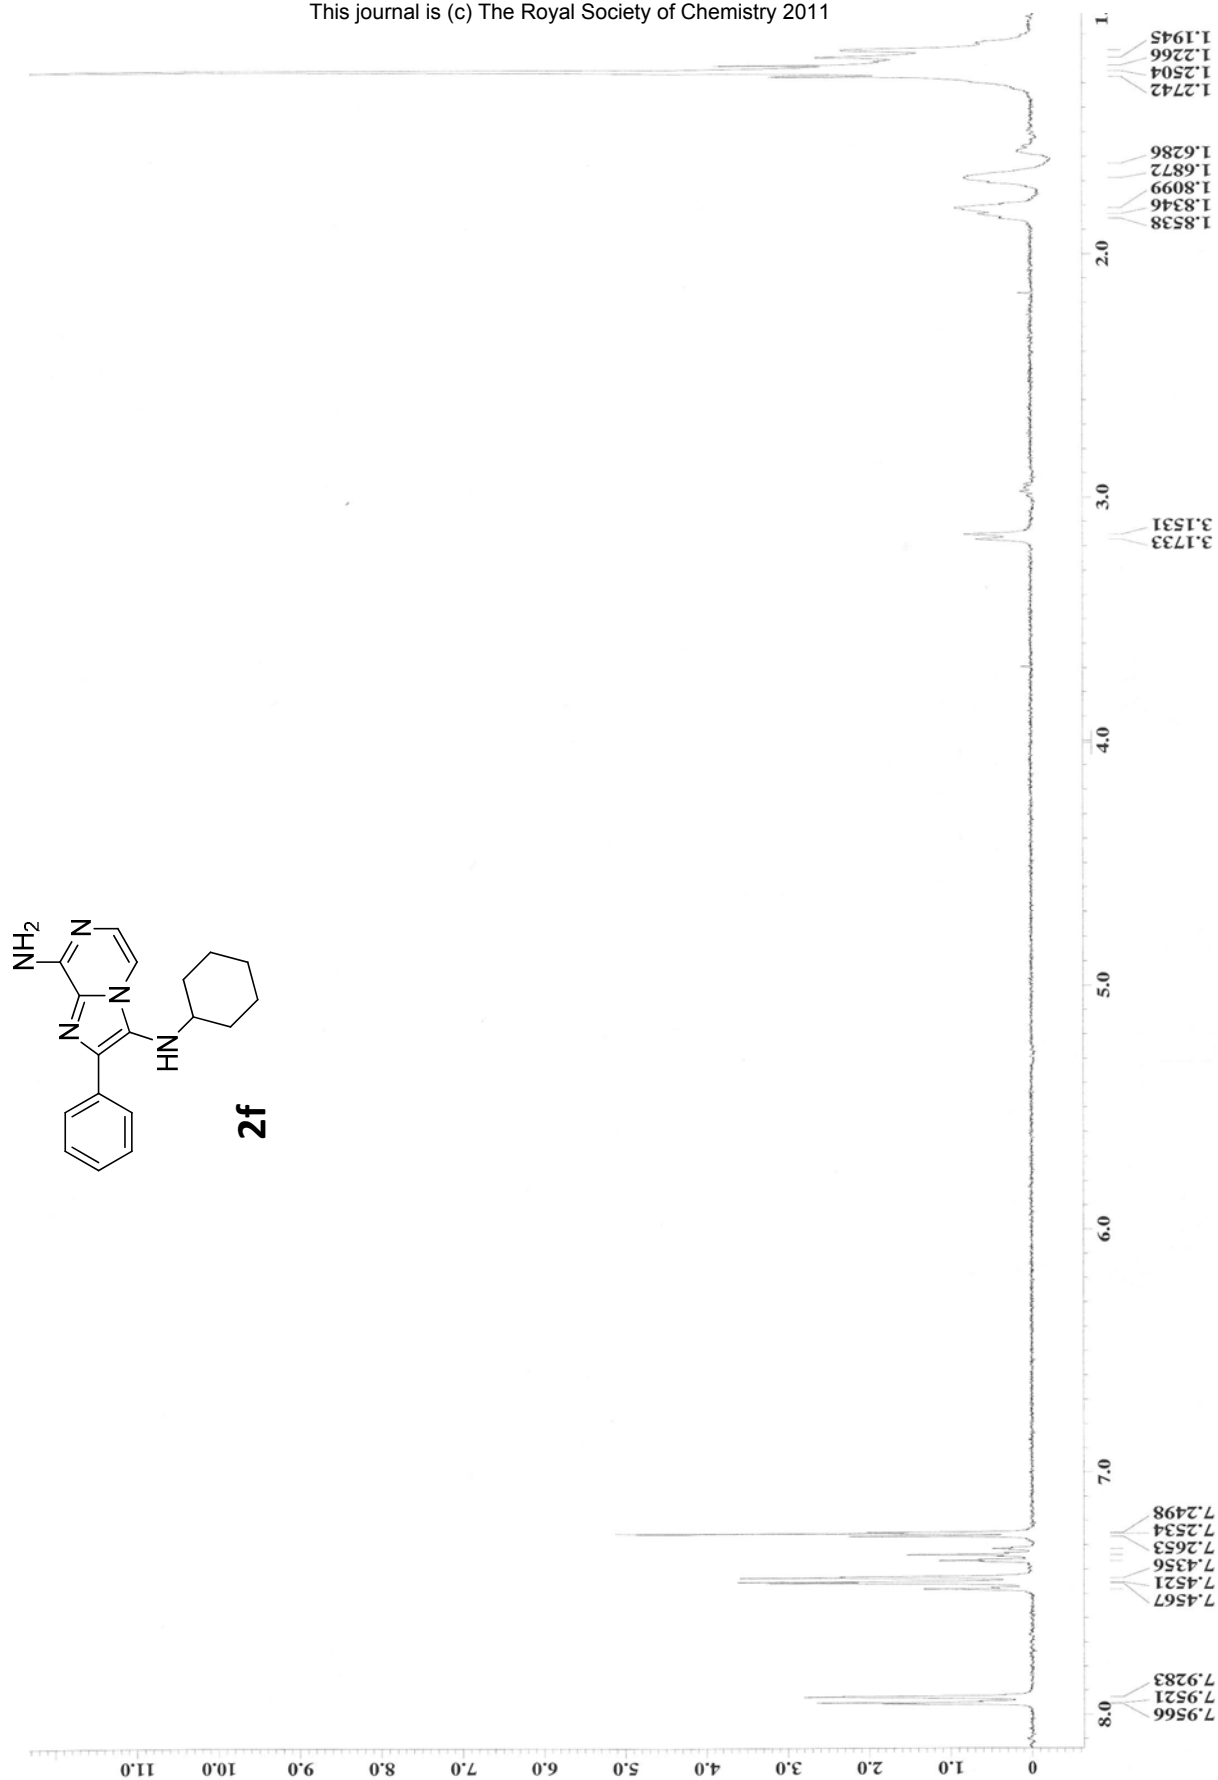

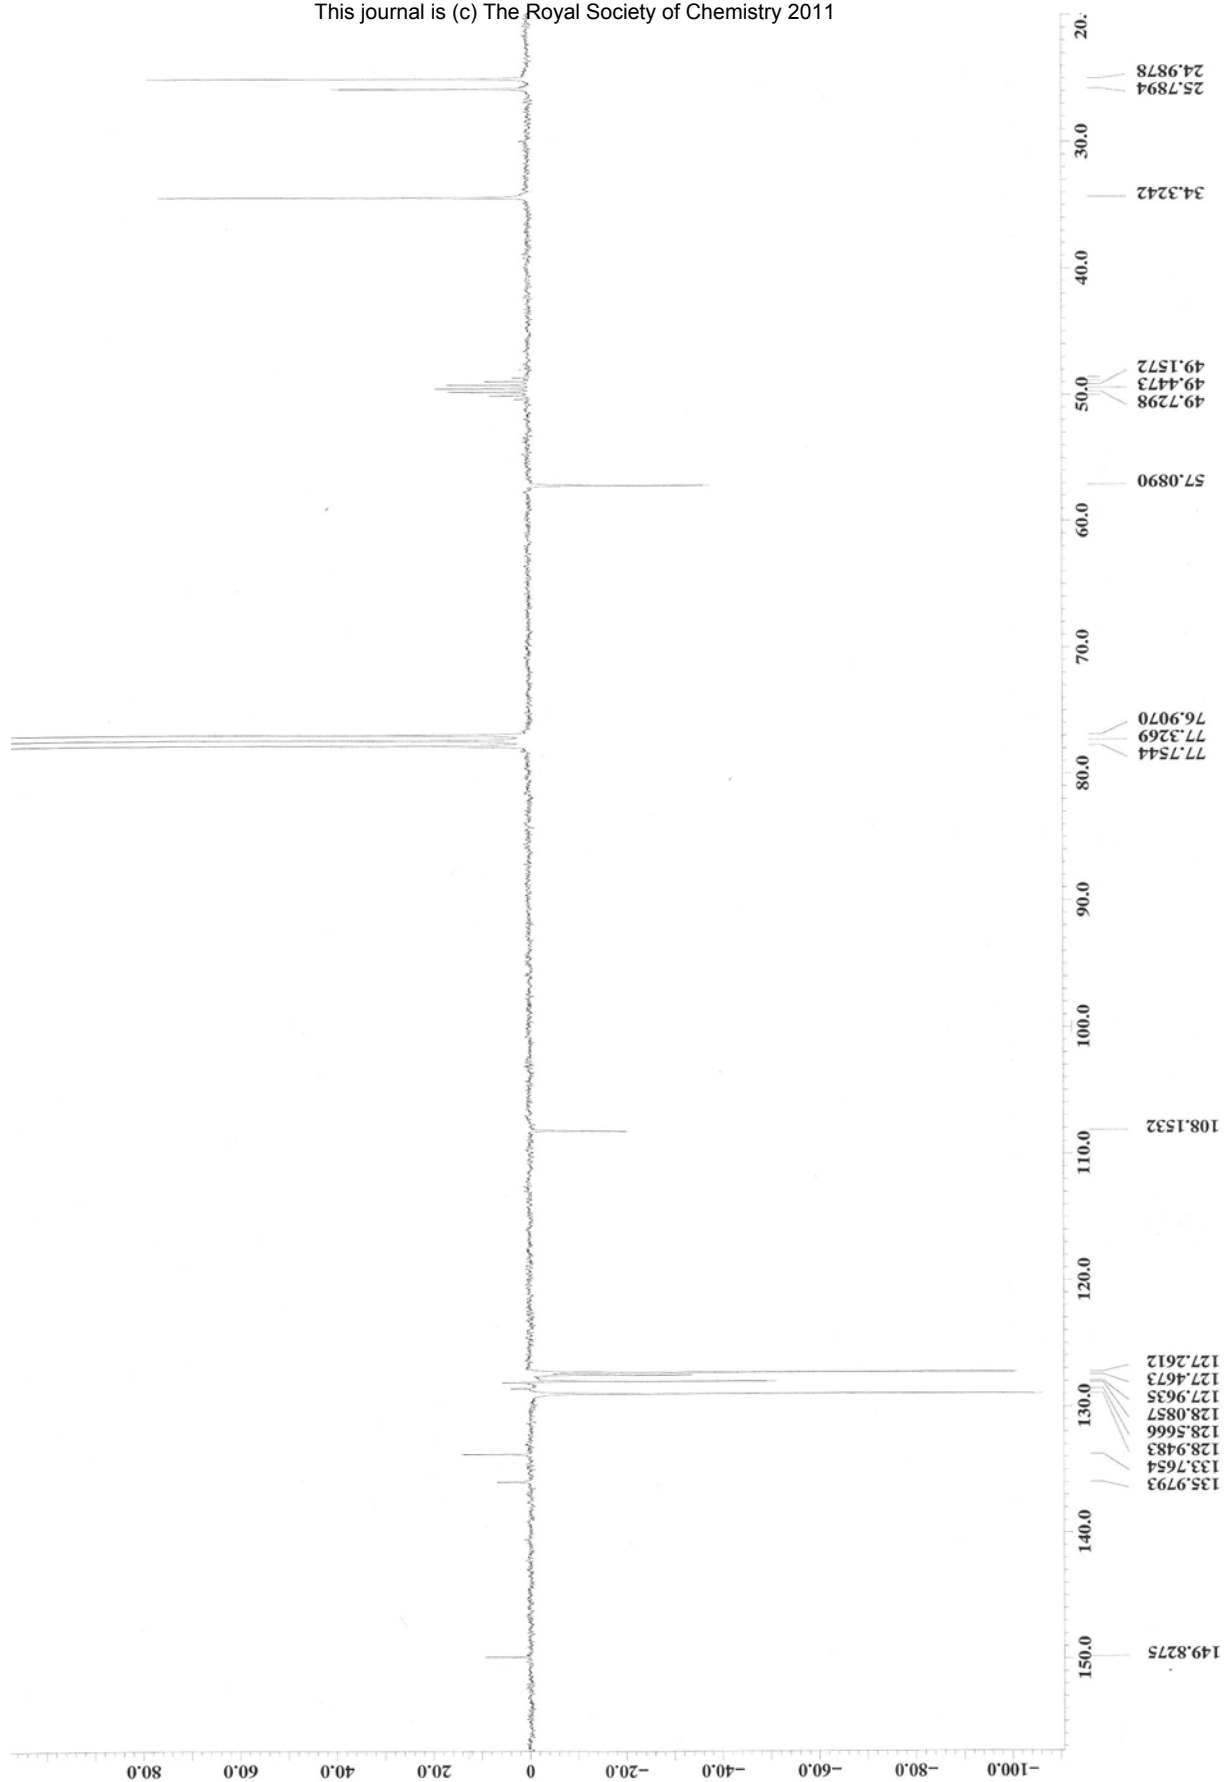



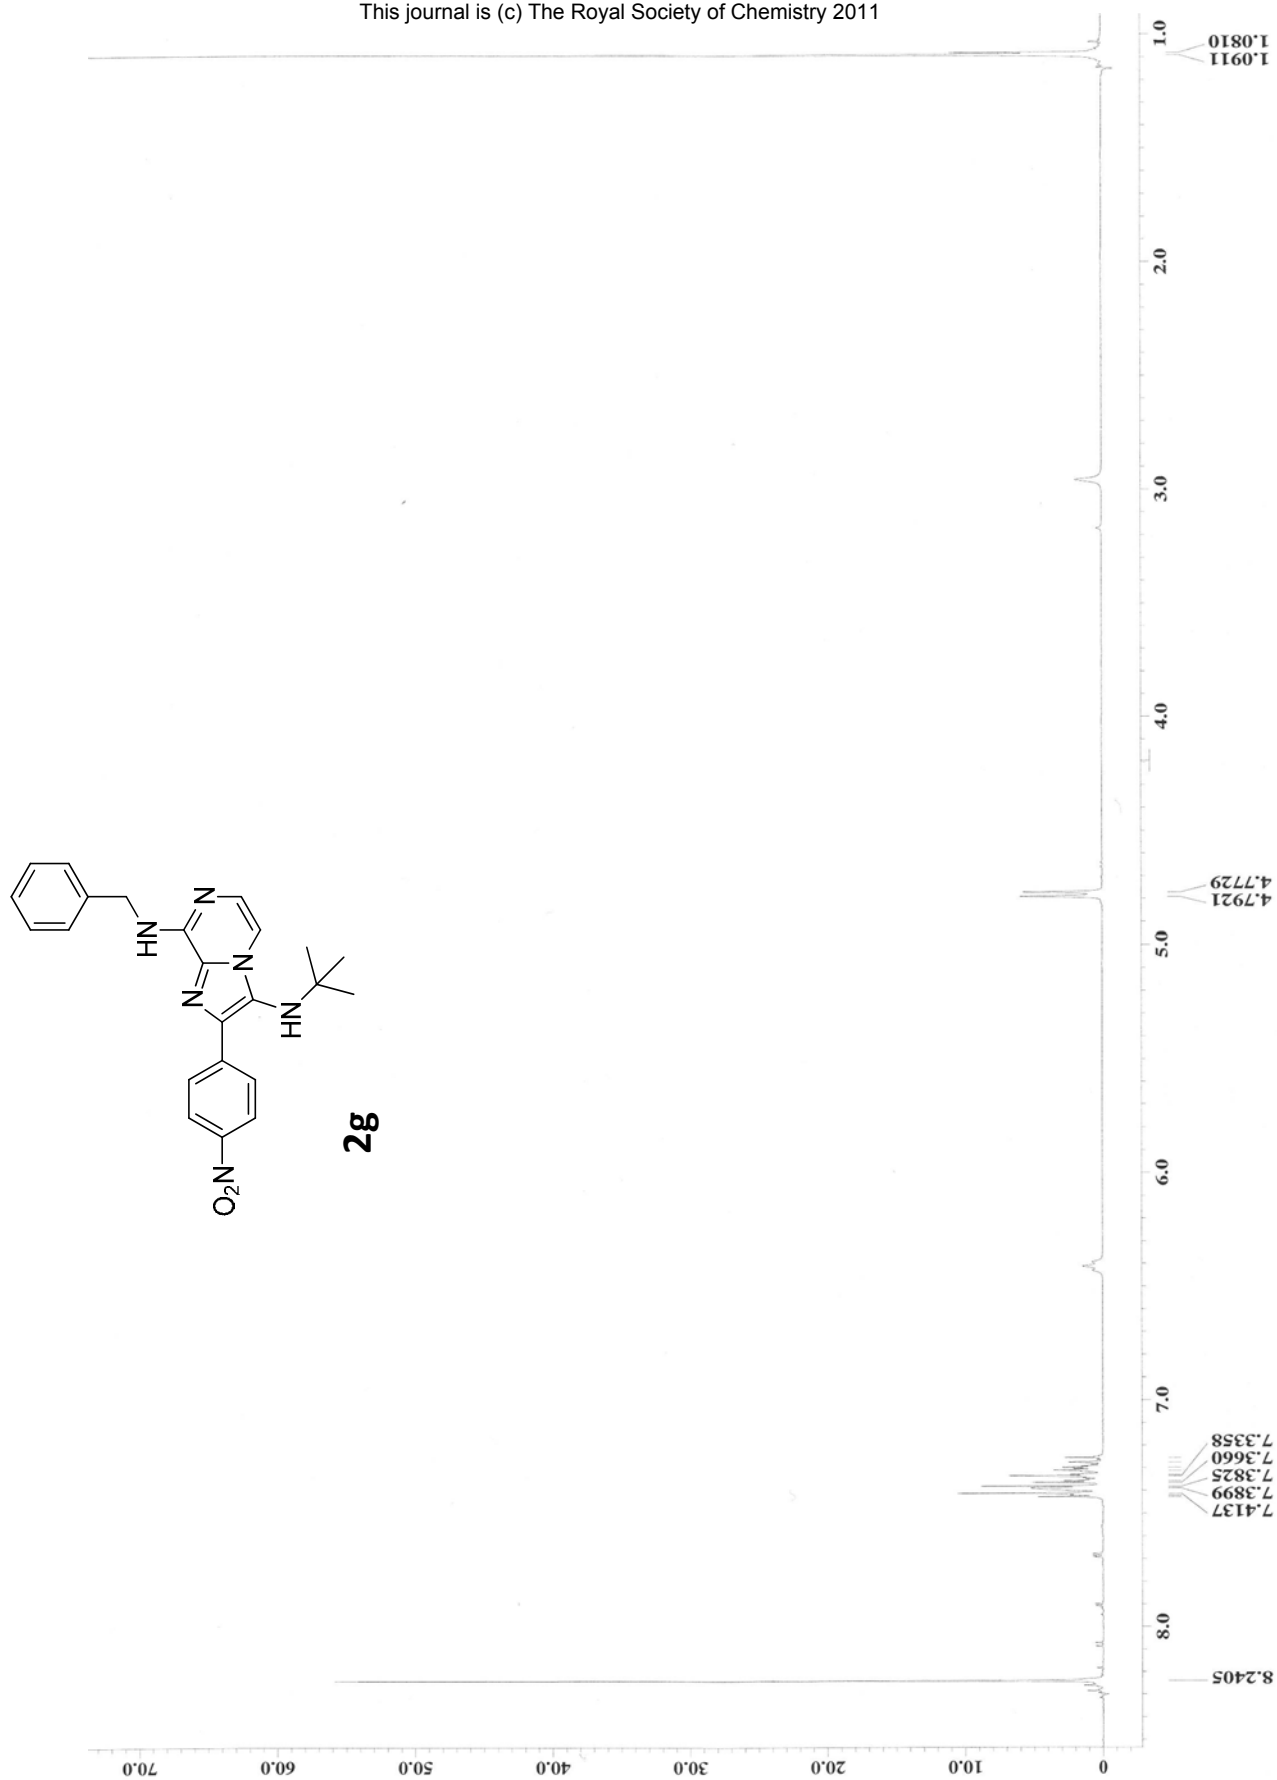

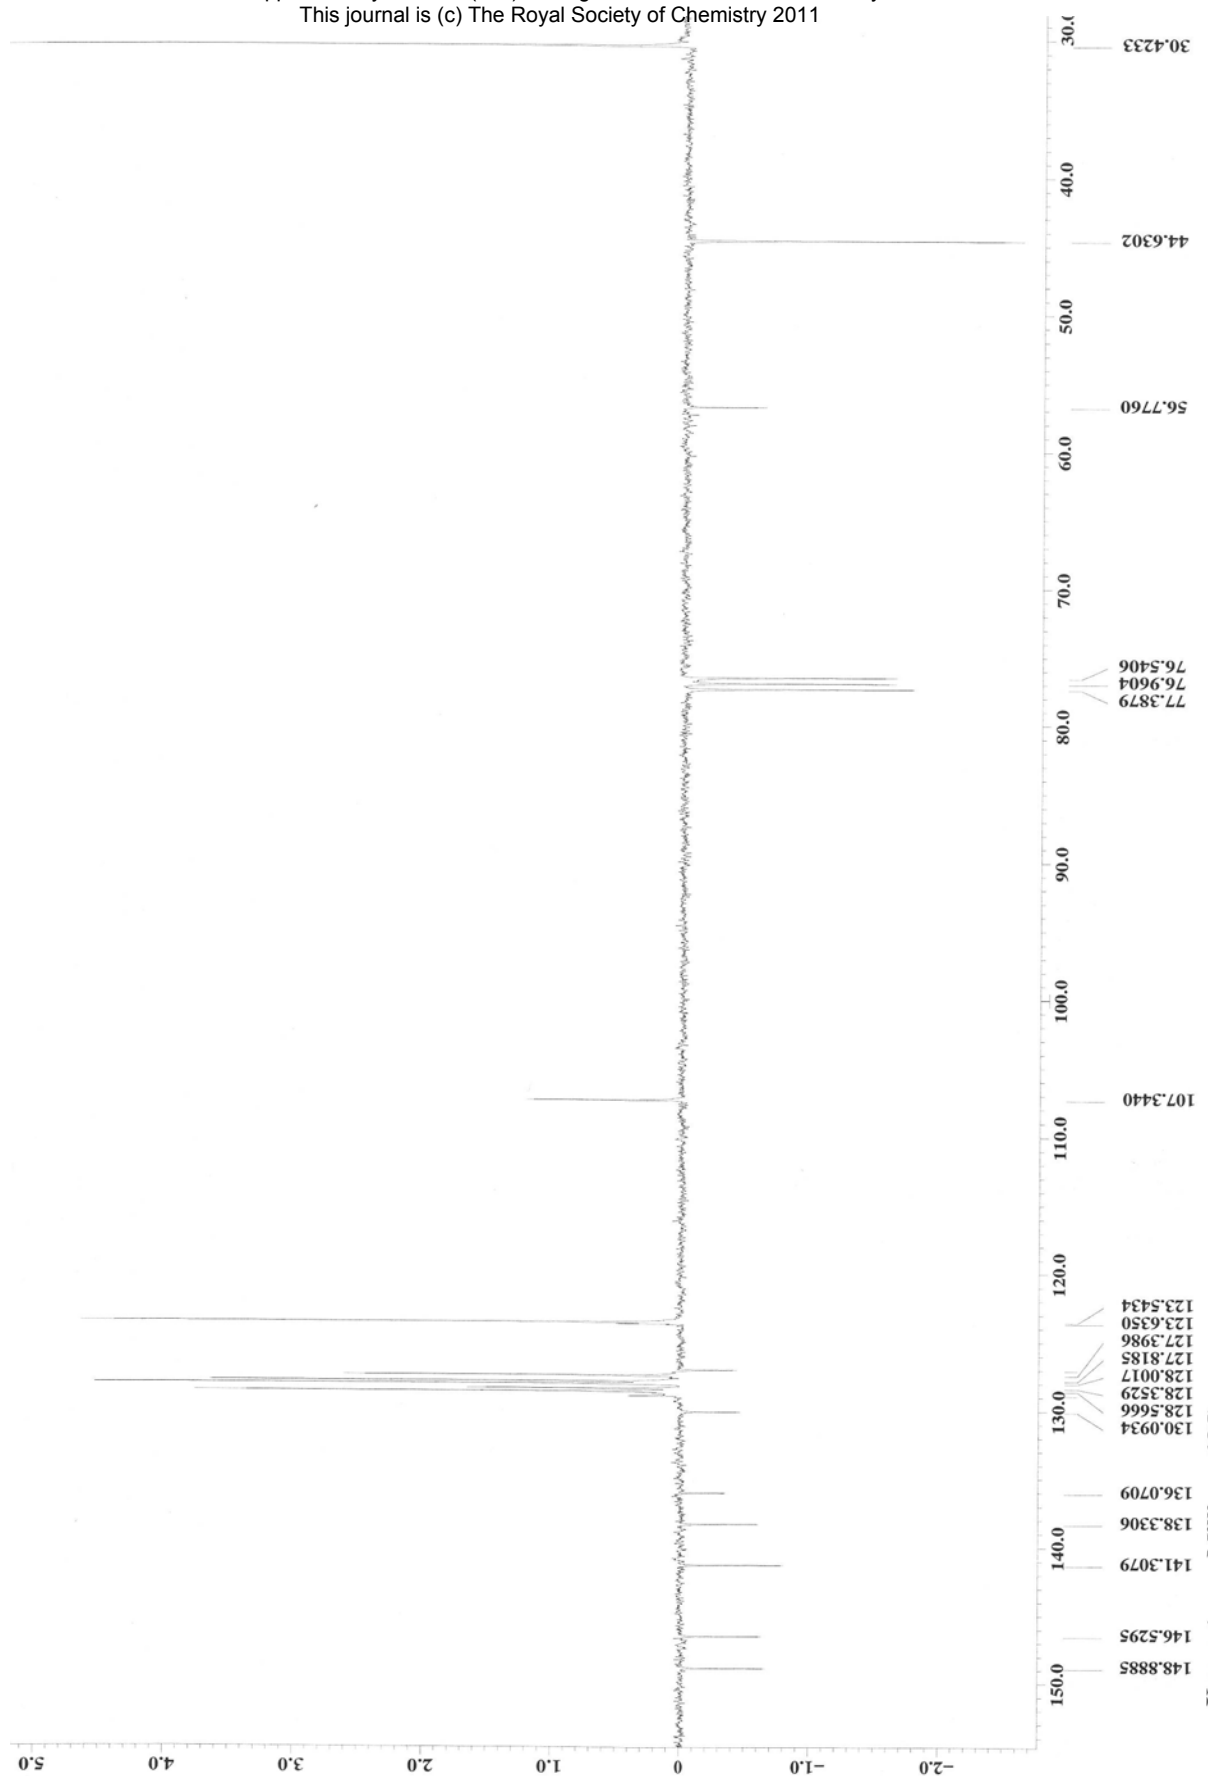

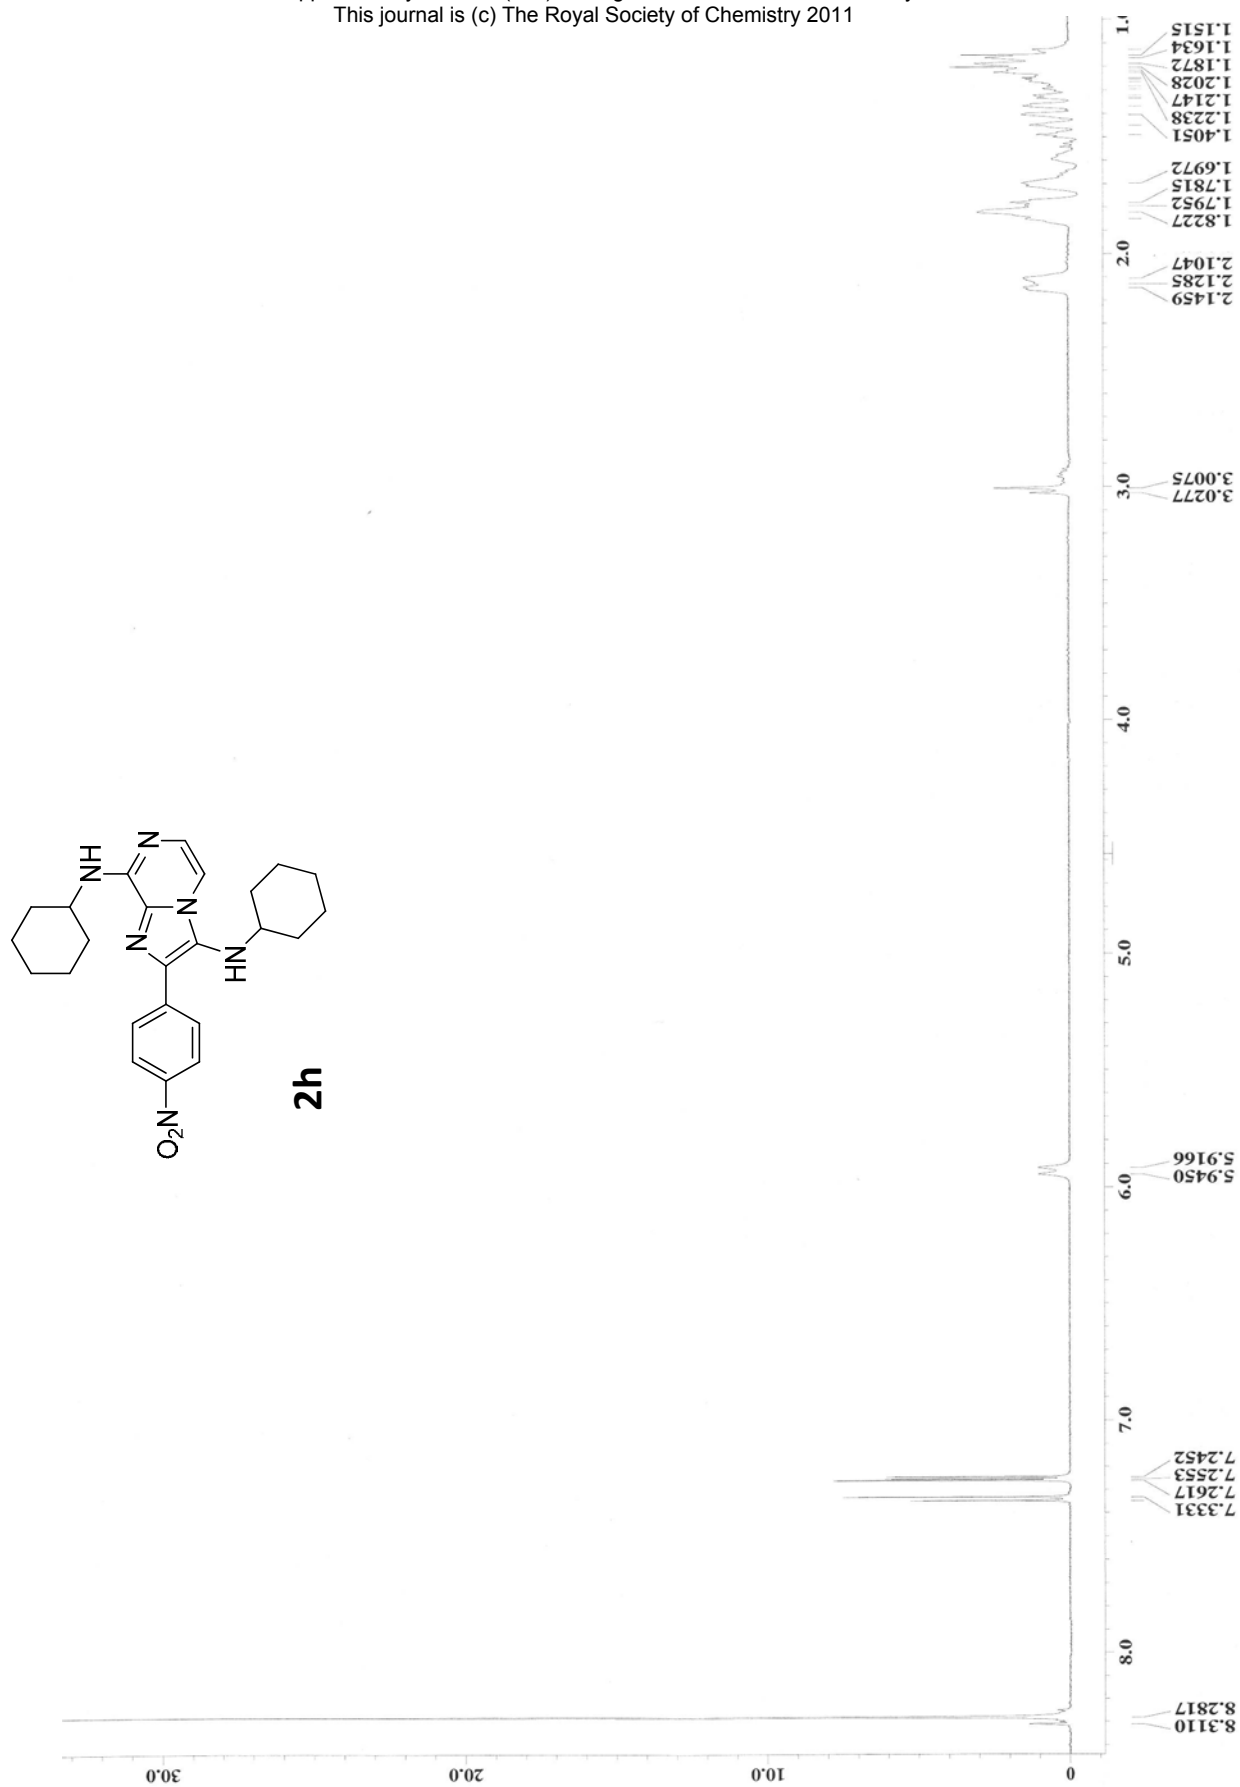

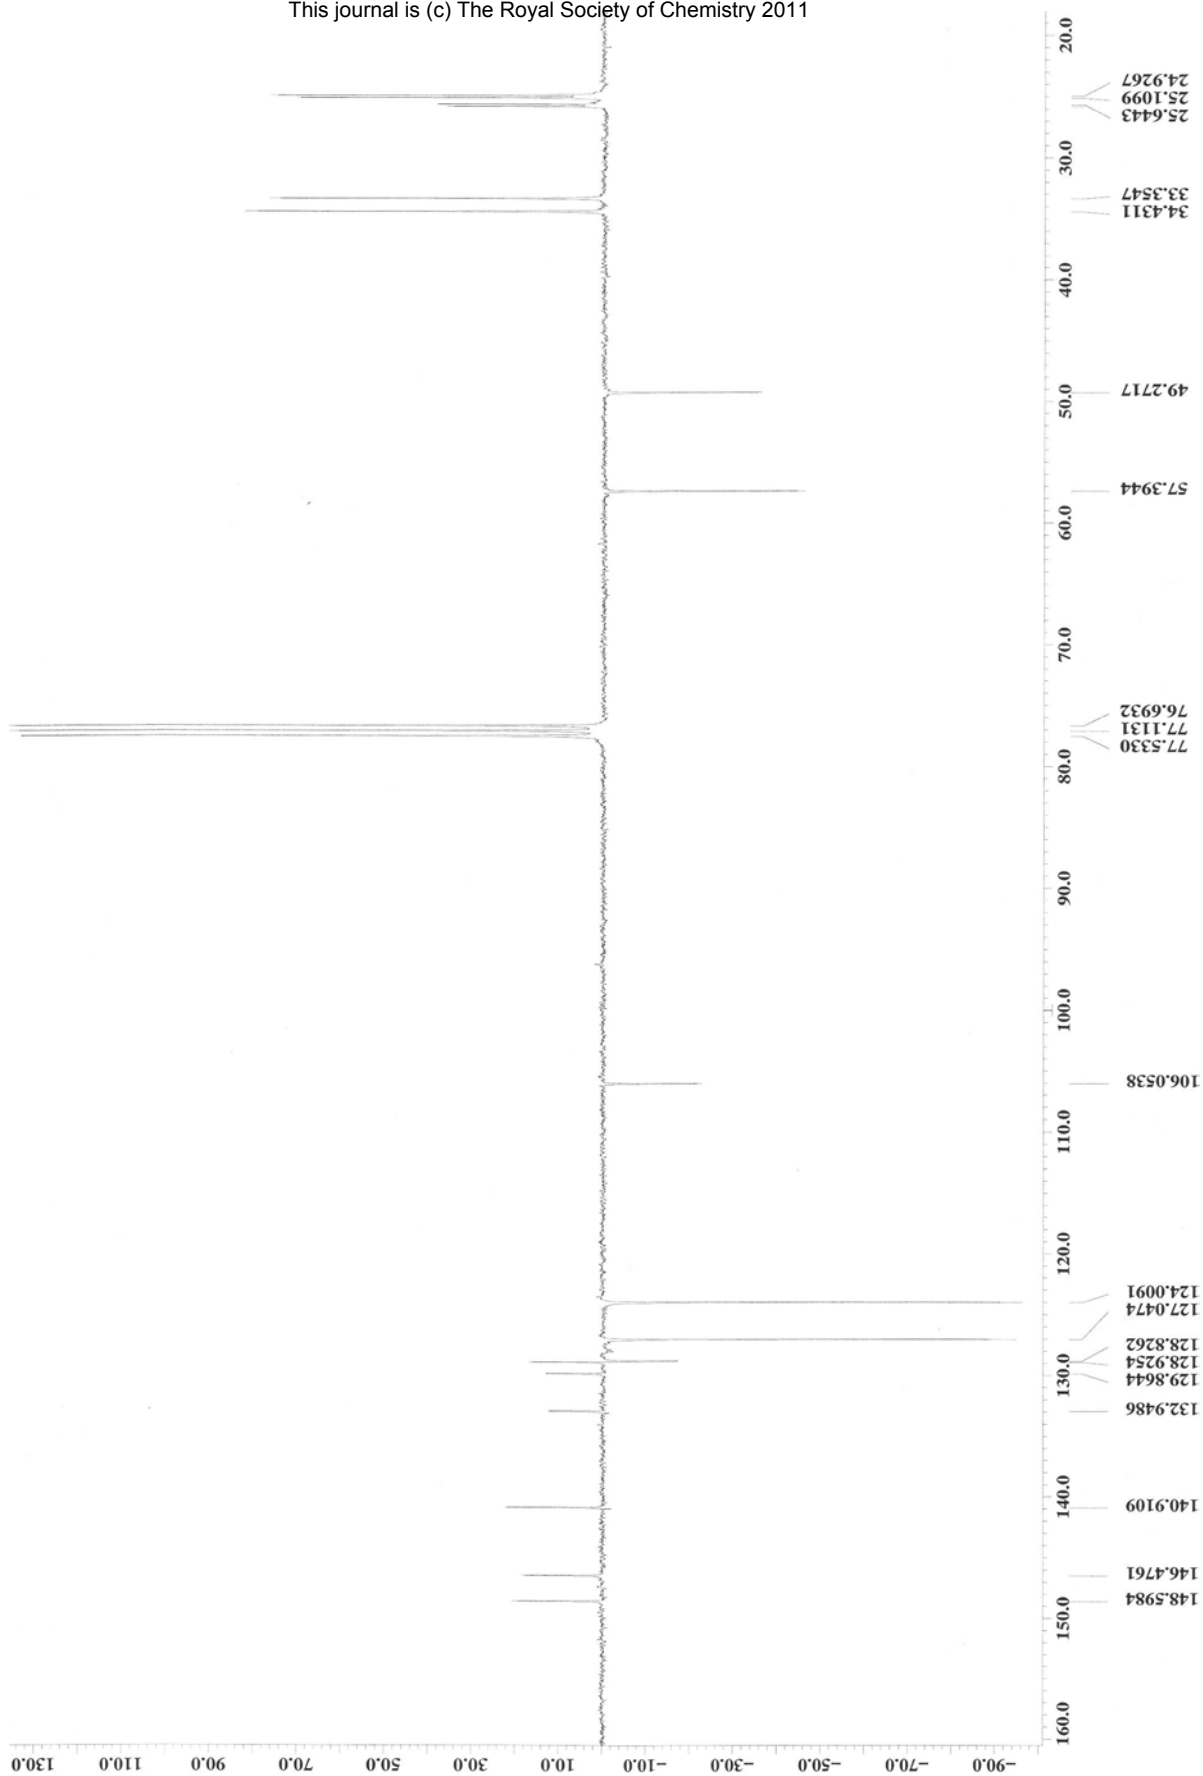

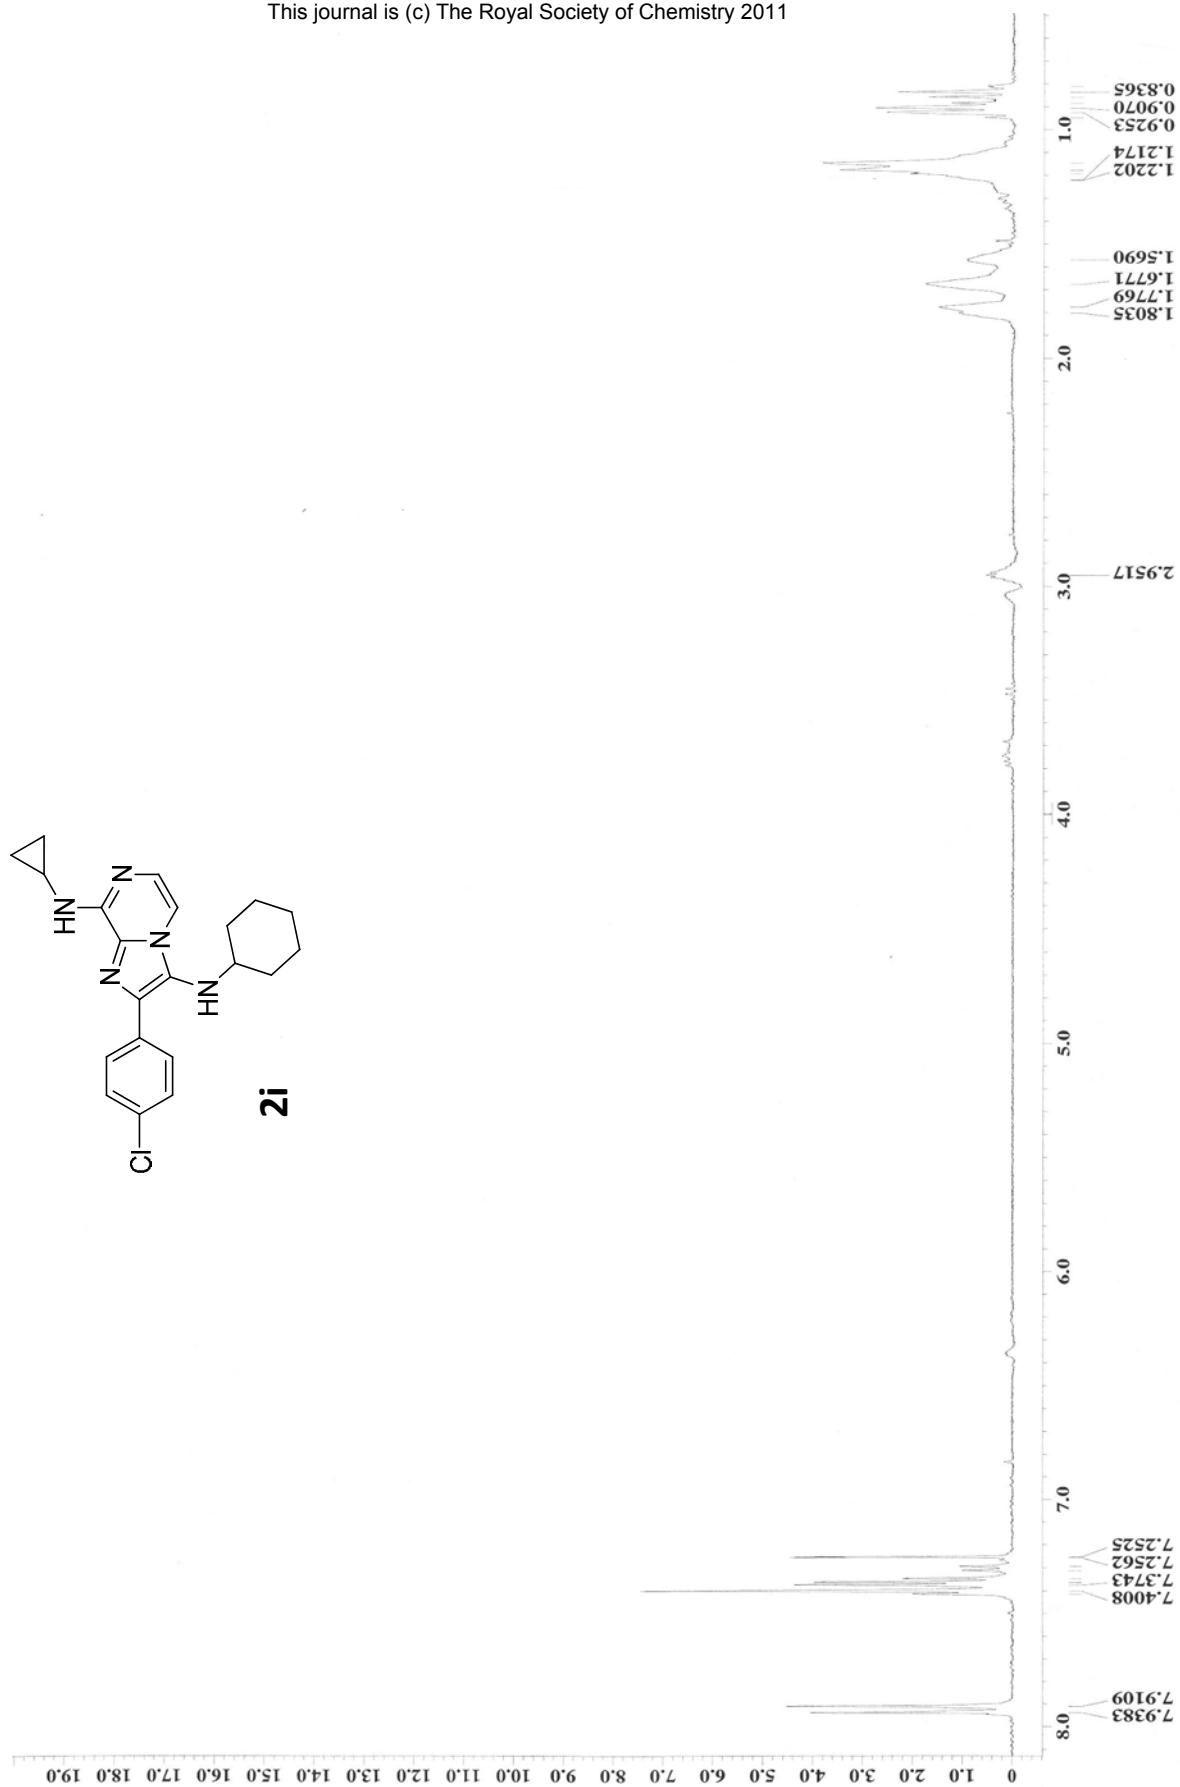

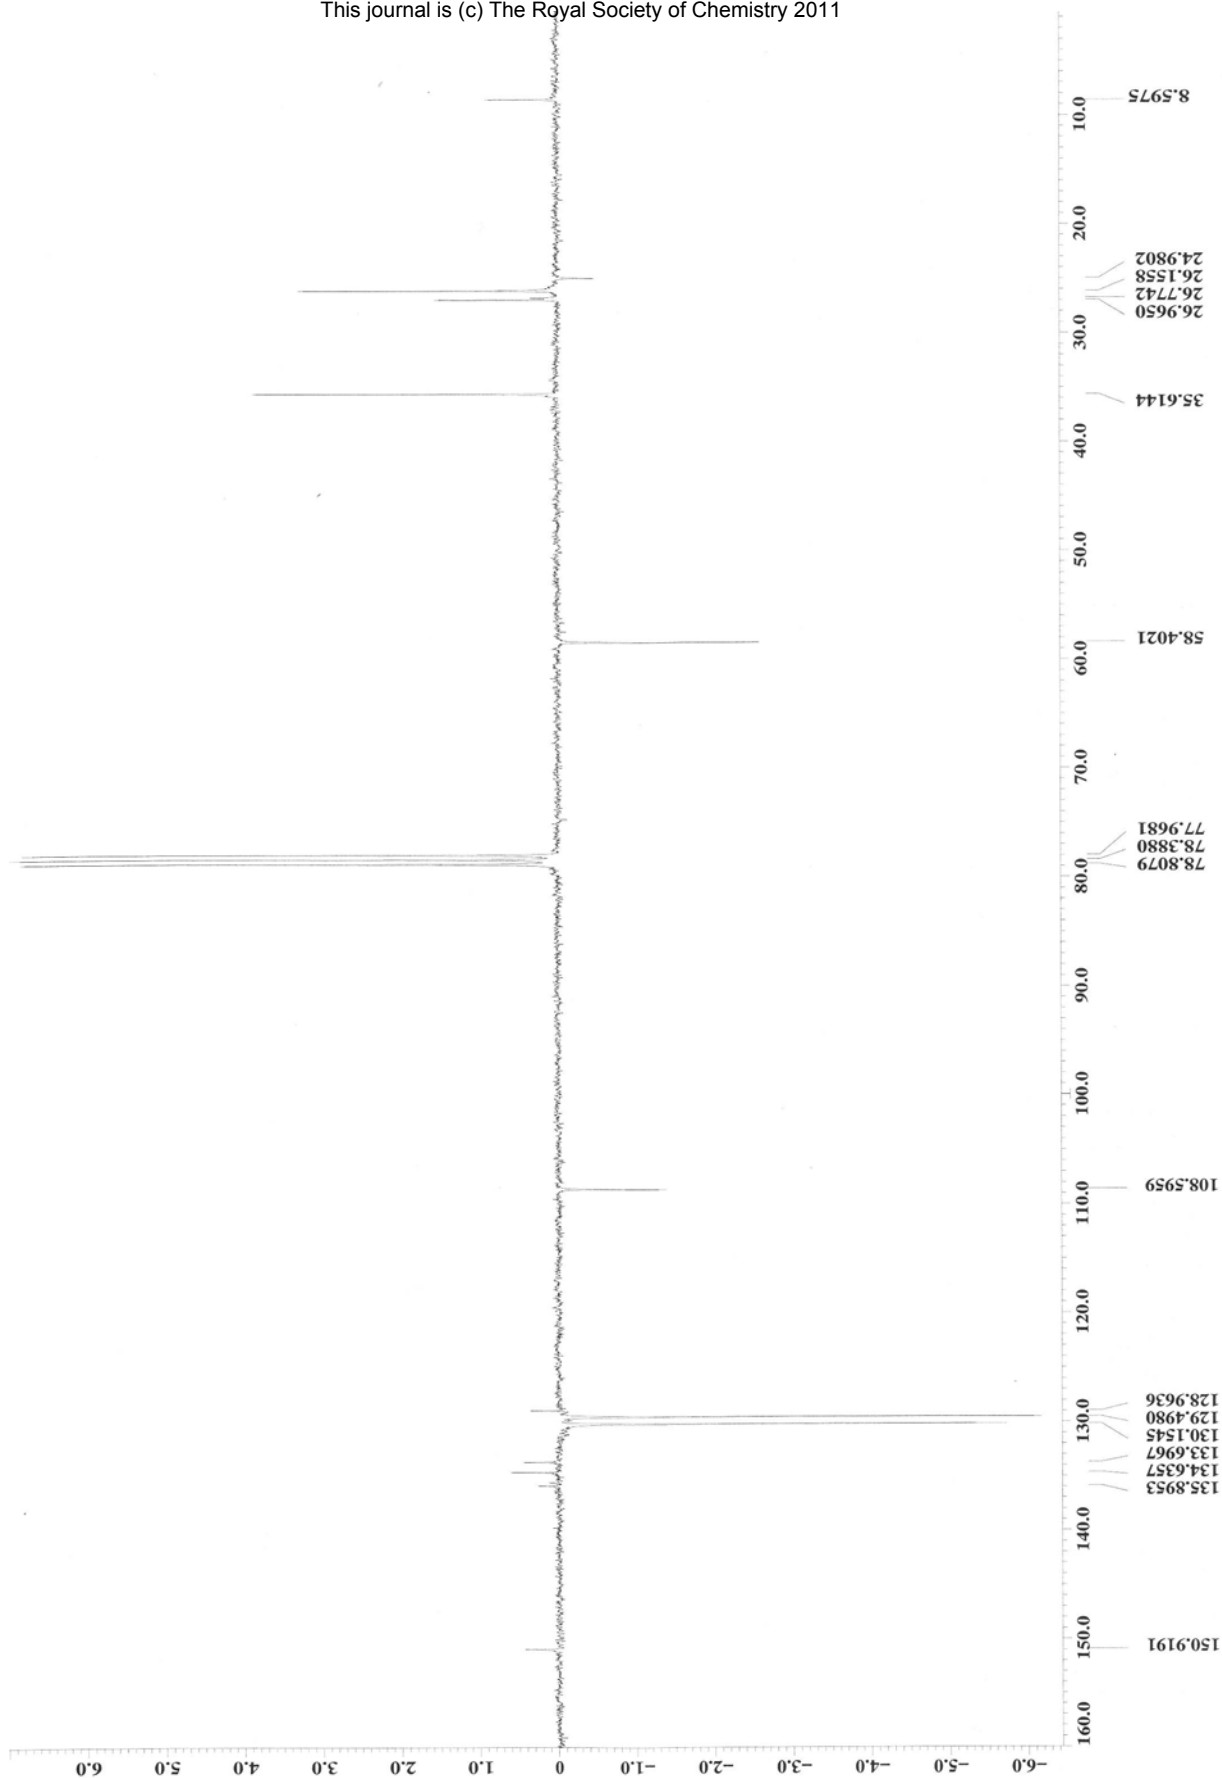

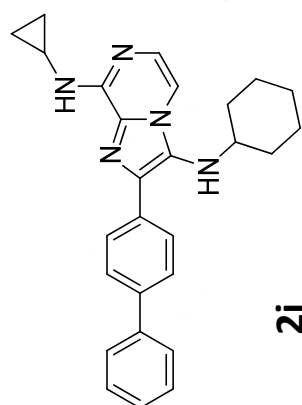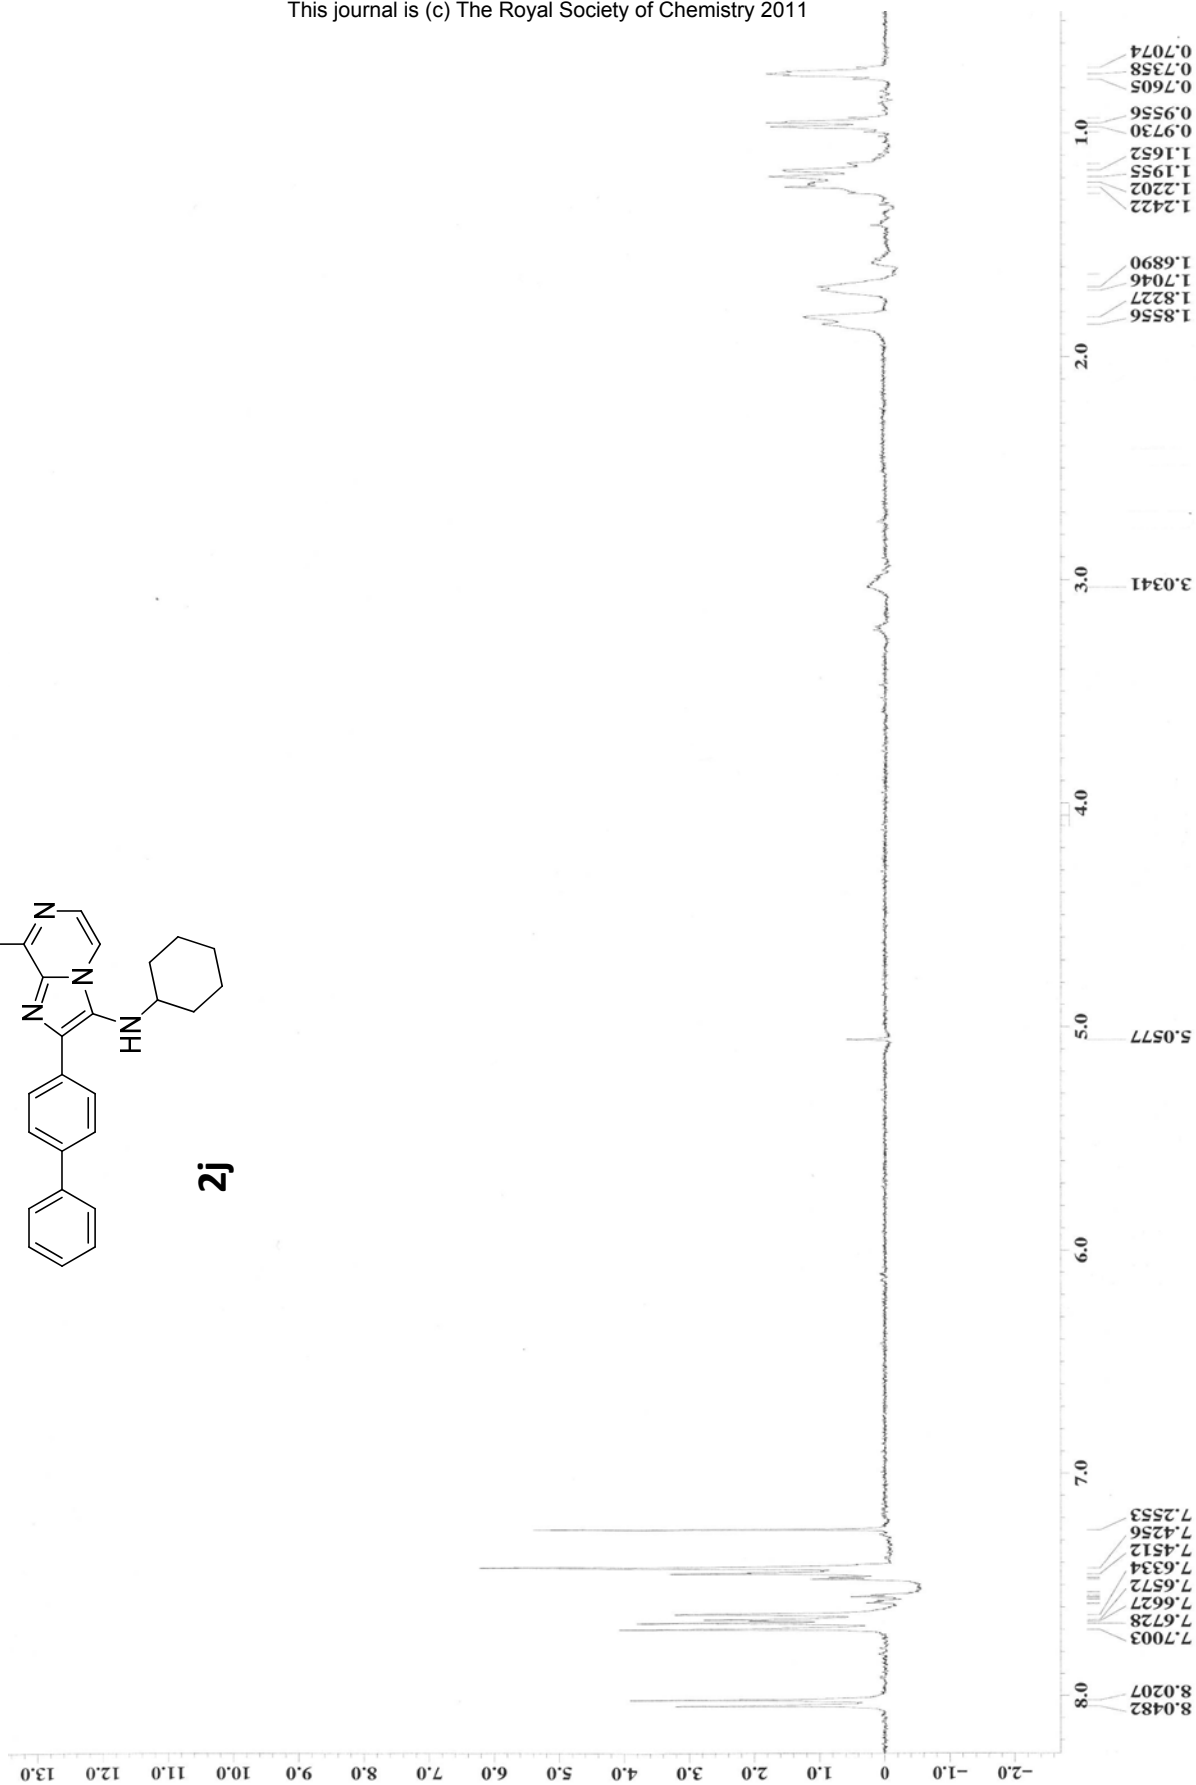

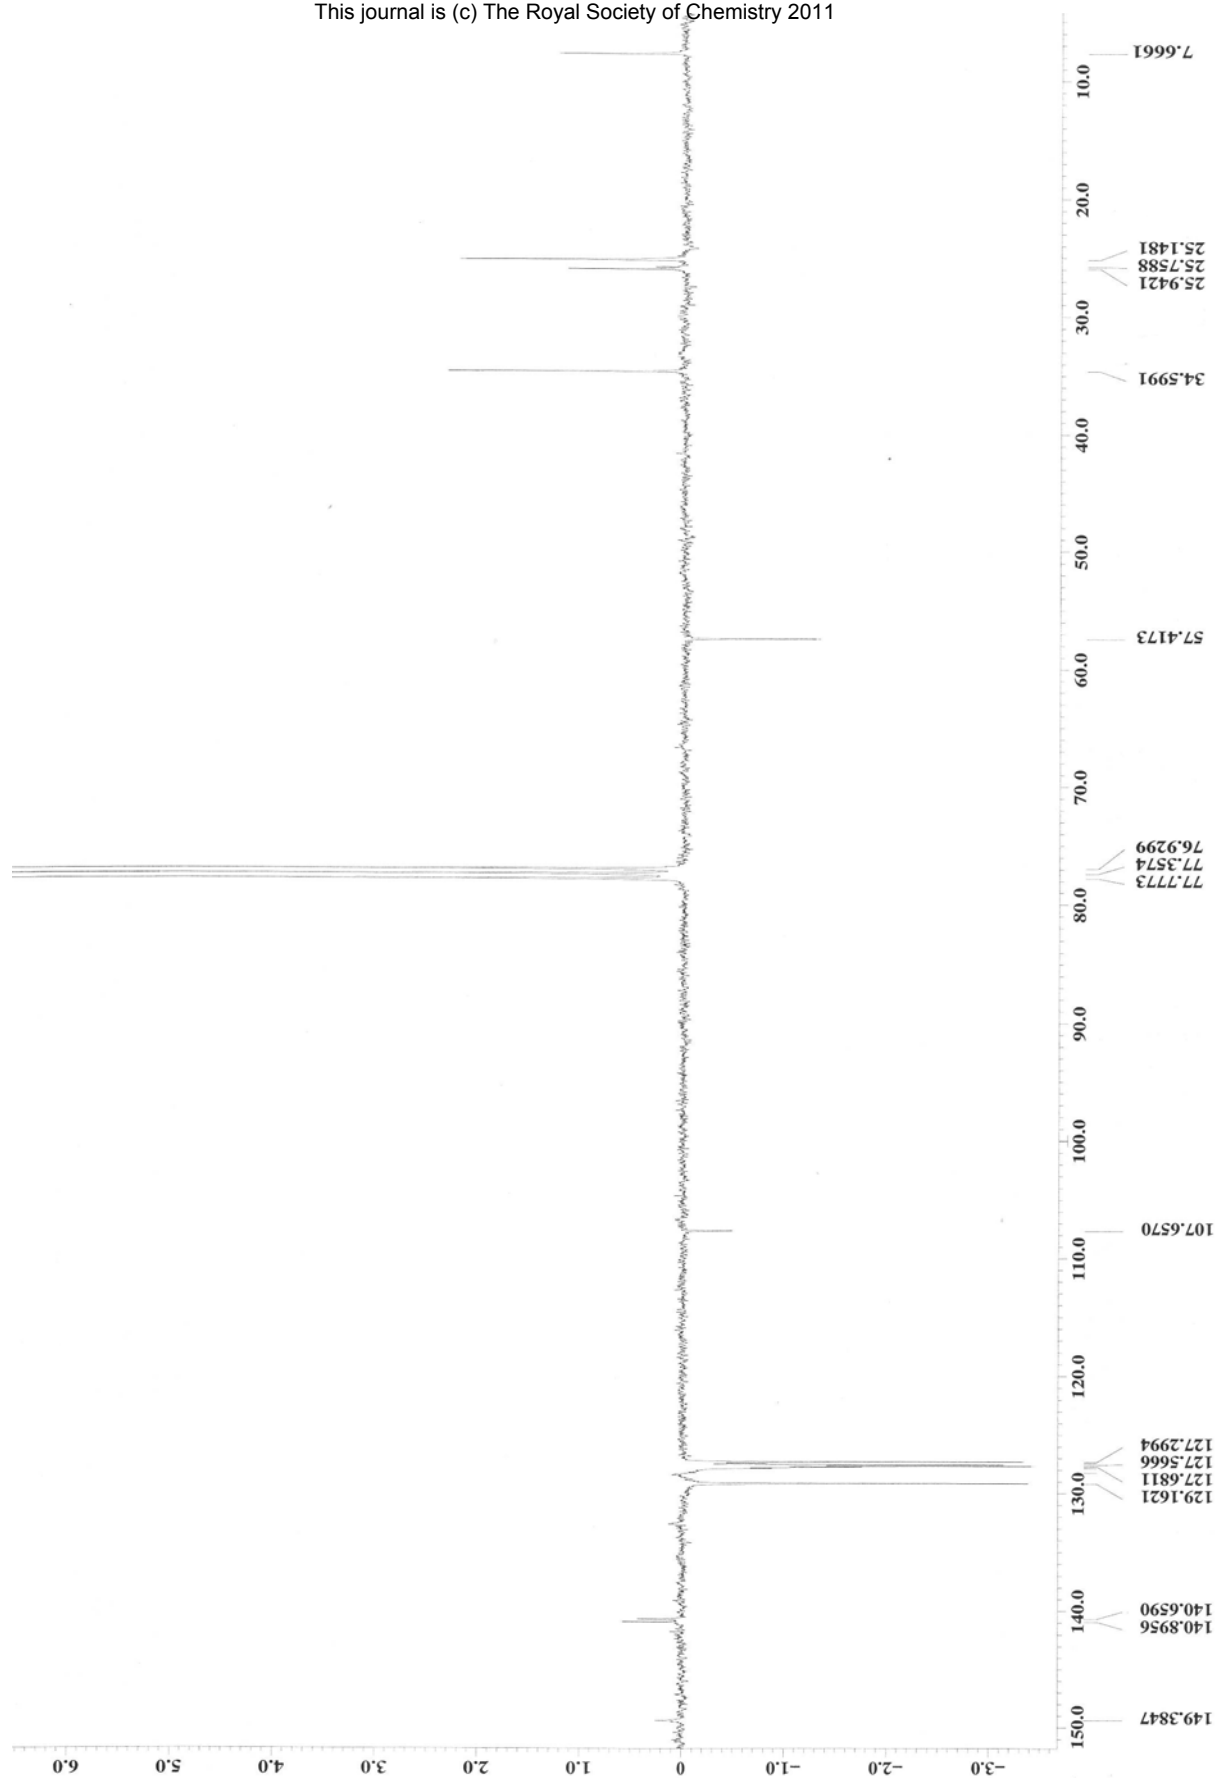



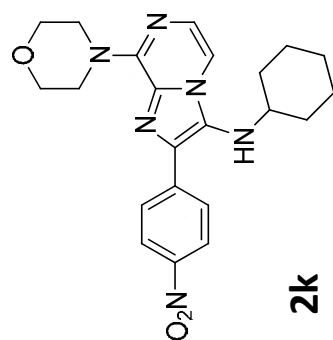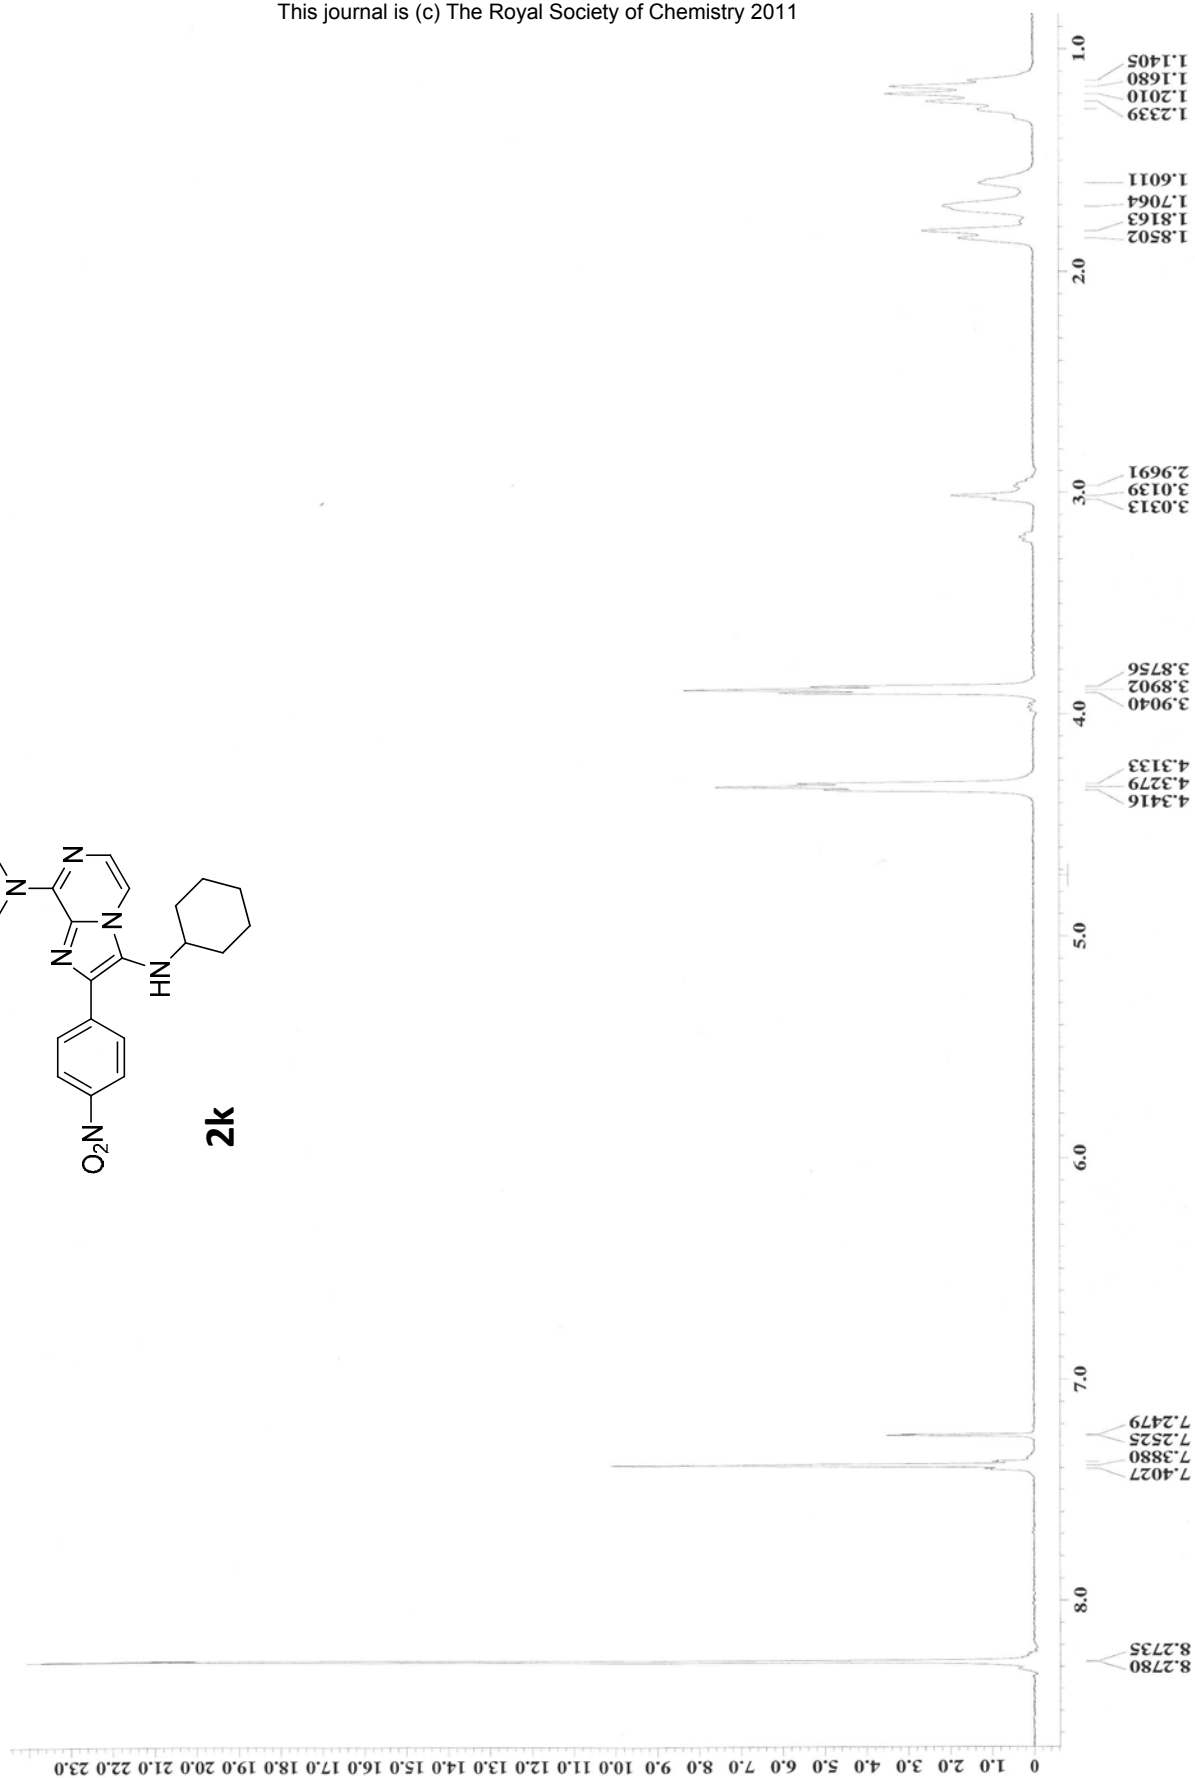

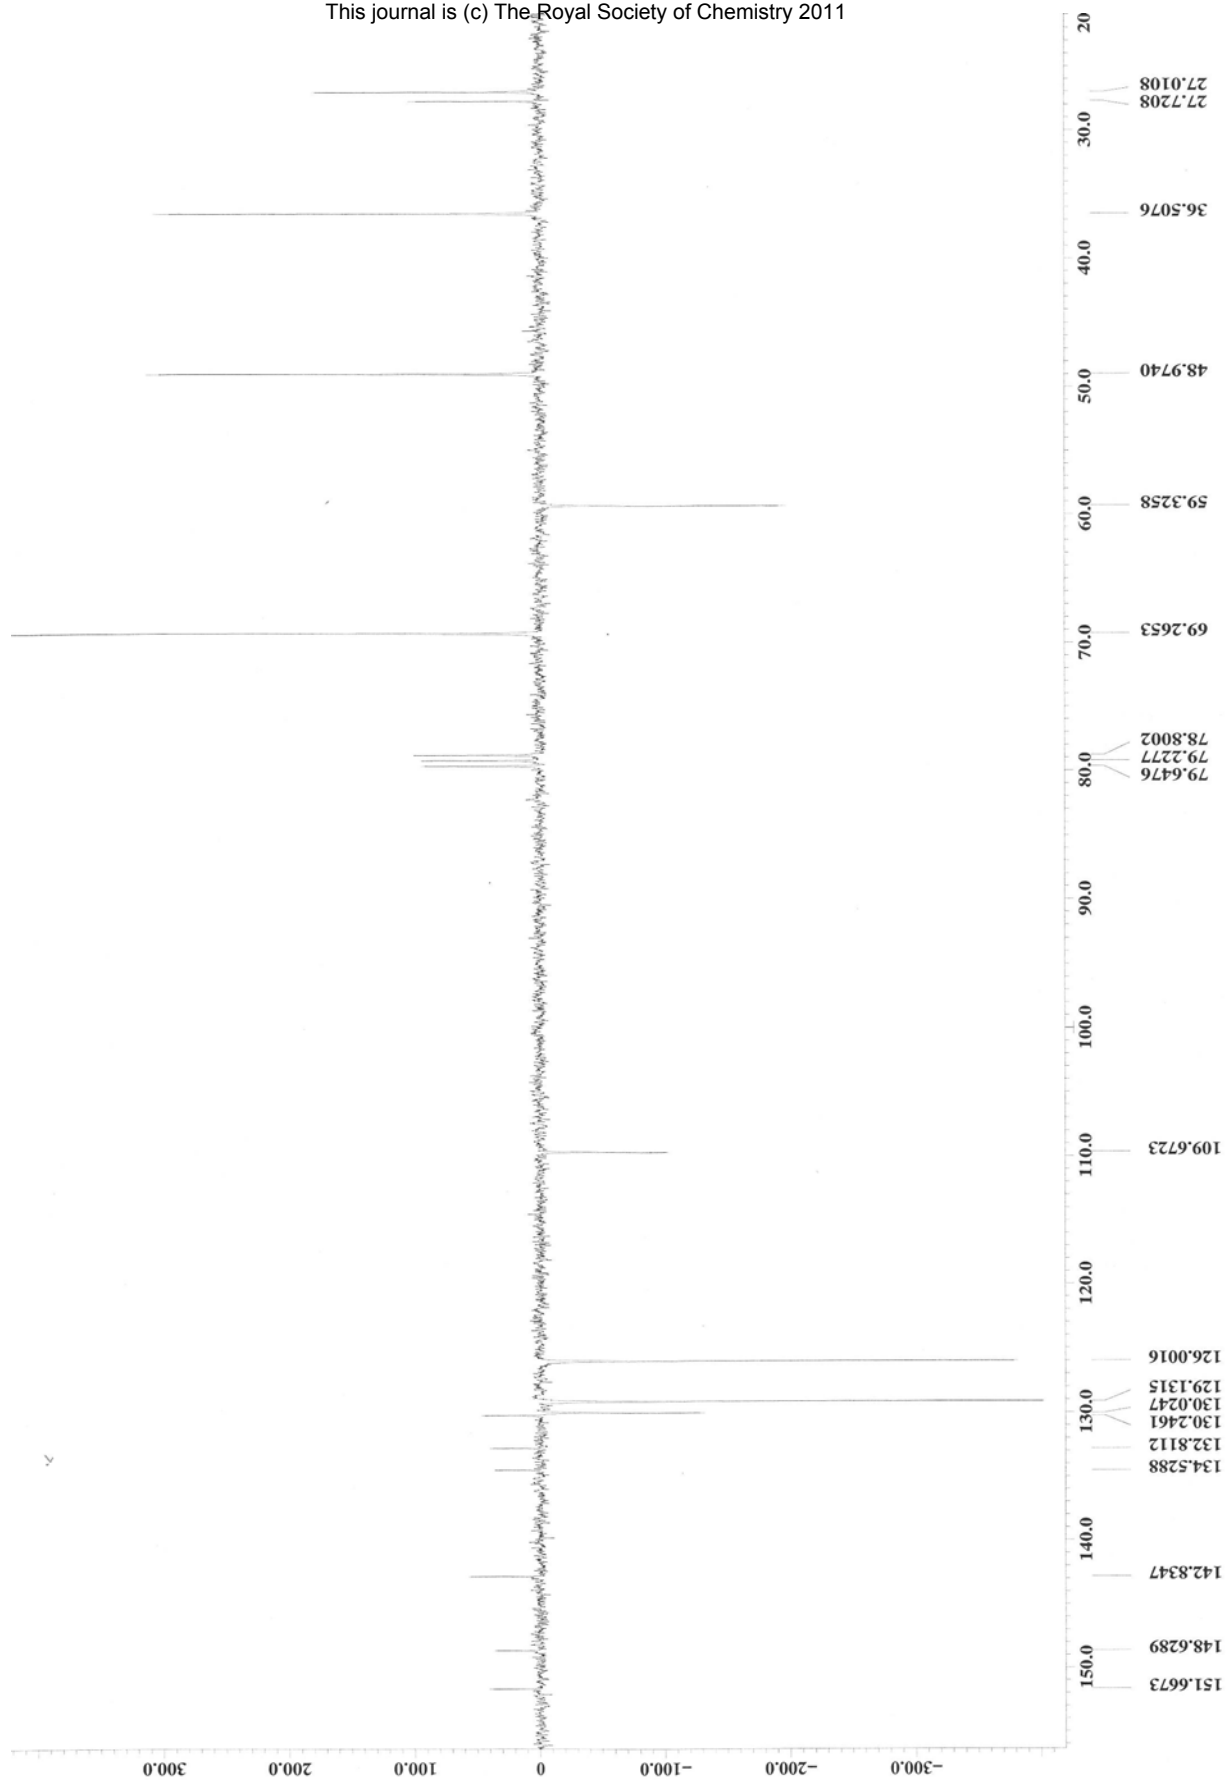

Supplement: c1ob05336a.pdf [file c1ob05336a.pdf]
